# Supplementary material for: DksA is a central regulatory switch for stress protection and virulence in Acinetobacter baumannii
Source: Research Square preprint supplement (doi:10.21203/rs.3.rs-449513/v1), 2021-04-29
Supplement: Supplementary file 2 [file 6611d07da2296ef21186396a.xlsx]

## Sheet: Supplementary Table 1
Supplementary table 1. List of genes with significant change in abundance under zinc and copper stresses in A. baumannii strain ATCC17978 detected by TraDIS. Locus tags are from ATCC 17978 (NCBI accession number: CP012004.1)
ZnSO4
locus_tag	gene_name	function	log2FC	Fold change	PValue	q.value
ACX60_01415	czcA	cation transporter (czcC?)	-3.553	11.7371	2.22e-196	6.92e-193
ACX60_17750	pgi	glucose-6-phosphate isomerase	-3.064	8.36288	2.52e-195	3.93e-192
ACX60_17760	galU	nucleotidyl transferase (GalU)	-2.705	6.52058	3.37e-162	3.5e-159
ACX60_04535	perM	permease	-2.574	5.95458	1.66e-126	1.29e-123
ACX60_17745	galE	UDP-galactose-4-epimerase	-2.695	6.47554	1.78e-120	1.11e-117
ACX60_15420	lptE	lipoprotein	-2.944	7.69542	2.64e-118	1.37e-115
ACX60_01400	ACX60_01400	cation transporter (czcI) ABUW_0265	-3.641	12.4753	5.48e-117	2.44e-114
ACX60_01410	czcB	hemolysin D	-3.669	12.7198	1.29e-108	5.04e-106
ACX60_16845	dksA	molecular chaperone DnaK	-3.128	8.74222	8.51e-101	2.95e-98
ACX60_15230	relA	GTP pyrophosphokinase	-2.654	6.2941	1.05e-100	3.27e-98
ACX60_15955	capM	glycosyl transferase	-3.106	8.60992	4.98e-88	1.41e-85
ACX60_17355	zur	Fur family transcriptional regulator	-2.717	6.57504	1.05e-85	2.73e-83
ACX60_16805	phoU	transcriptional regulator PhoU	-3.568	11.8597	4.67e-76	1.12e-73
ACX60_05950	rlpA	Rare lipoprotein A precursor	-1.548	2.92411	3.23e-70	6.73e-68
ACX60_01070	ACX60_01070	monoamine oxidase	-2.018	4.05022	1.02e-67	2e-65
ACX60_01420	czcD	cation transporter (czcD) ABUW_0269	-4.032	16.3589	1.54e-65	2.66e-63
ACX60_17765	epsL	UDP-galactose phosphate transferase	-2.123	4.35599	1.67e-59	2.74e-57
ACX60_01985	mlaE	ABC transporter permease	-1.557	2.94241	7.34e-57	1.15e-54
ACX60_01405	czcC	RND transporter	-2.807	6.99828	3.91e-53	5.54e-51
ACX60_13105	mltD	lytic murein transglycosylase	-1.26	2.39496	2.06e-48	2.68e-46
ACX60_04585	pal	peptidoglycan-binding protein	-1.414	2.66475	2.31e-46	2.88e-44
ACX60_16950	ACX60_16950	hypothetical protein	-1.615	3.06312	2.02e-45	2.42e-43
ACX60_13195	ACX60_13195	hypothetical protein	-1.651	3.14051	2.75e-45	3.18e-43
ACX60_17830	wzb	protein tyrosine phosphatase (wzb)	-4.768	27.2465	7.06e-43	7.86e-41
ACX60_13980	minC	septum site-determining protein MinC	-1.478	2.78562	4.32e-41	4.65e-39
ACX60_05345	pstA	high frequency lysogenization protein HflD	-1.478	2.78562	3.93e-40	3.95e-38
ACX60_05350	pstB	phosphate ABC transporter ATP-binding protein	-1.506	2.84021	2.78e-39	2.71e-37
ACX60_16755	hvrA	DNA-binding protein	-2.277	4.84669	6.75e-38	6.38e-36
ACX60_15585	bamB	membrane protein	-1.012	2.0167	2.5e-37	2.29e-35
ACX60_01980	mlaF	ABC transporter ATP-binding protein	-1.847	3.59751	6.61e-36	5.89e-34
ACX60_17770	lsgF	amylovoran biosynthesis protein AmsE	-2.465	5.52127	8.67e-36	7.51e-34
ACX60_15755	ACX60_15755	Sel1 repeat protein	-1.198	2.29421	1.6e-35	1.35e-33
ACX60_04605	tolQ	colicin uptake protein TolQ	-1.297	2.45717	3.68e-35	3.02e-33
ACX60_01215	kup	potassium transporter Kup	-1.08	2.11404	6.98e-35	5.58e-33
ACX60_05335	pstS	phosphonate ABC transporter substrate-binding protein	-1.281	2.43007	1.12e-34	8.72e-33
ACX60_02975	ACX60_02975	histidine kinase	-1.126	2.18253	5.1e-32	3.88e-30
ACX60_00805	ACX60_00805	peptidase M23	-1.124	2.1795	1.35e-31	9.99e-30
ACX60_09540	ACX60_09540	hypothetical protein	-1.519	2.86592	3.83e-31	2.78e-29
ACX60_05340	pstC	ABC transporter permease	-1.331	2.51577	5.34e-31	3.7e-29
ACX60_04595	tolA	gramicidin synthase	-1.24	2.36199	1.32e-30	8.97e-29
ACX60_16900	pbpG	D-alanyl-D-alanine endopeptidase	-1.109	2.15696	1.55e-30	1.03e-28
ACX60_17910	gph	phosphoglycolate phosphatase	-1.022	2.03073	3.31e-30	2.15e-28
ACX60_01995	mlaC	toluene tolerance protein	-1.327	2.5088	1.43e-27	8.94e-26
ACX60_04590	tolB	translocation protein TolB	-1.172	2.25324	1.99e-27	1.22e-25
ACX60_15605	rodZ	DNA-binding protein	-1.093	2.13317	2.57e-27	1.54e-25
ACX60_04600	tolR	biopolymer transporter TolR	-1.583	2.99592	5.41e-27	3.12e-25
ACX60_03010	cps4G	glycosyl transferase	-1.091	2.13022	1.79e-26	1.02e-24
ACX60_17695	acnD	aconitate hydratase	-1.082	2.11697	1.89e-24	9.49e-23
ACX60_15465	yibN	rhodanese	-1.049	2.0691	5.68e-23	2.81e-21
ACX60_15250	gacS	chemotaxis protein CheY (gacS)	-1.176	2.25949	1.24e-22	6.05e-21
ACX60_13985	minD	cell division inhibitor MinD	-1.086	2.12285	1.16e-21	5.4e-20
ACX60_14320	rluB	pseudouridine synthase	-1.075	2.10672	1.19e-21	5.43e-20
ACX60_00650	parE	DNA topoisomerase IV subunit B	-2.198	4.58843	1.62e-21	7.23e-20
ACX60_13200	zapA	cell division protein ZapA	-1.308	2.47598	5.2e-19	2e-17
ACX60_03520	ACX60_03520	hypothetical protein	-1.097	2.13909	1.89e-18	7.09e-17
ACX60_17740	manB	phosphomannomutase	-2.221	4.66216	4.03e-18	1.43e-16
ACX60_06605	ACX60_06605	hypothetical protein	-1.392	2.62442	6.97e-18	2.44e-16
ACX60_14340	bioA	adenosylmethionine-8-amino-7-oxononanoate aminotransferase	-1.071	2.10089	1.3e-17	4.41e-16
ACX60_14640	ACX60_14640	chemotaxis protein CheY	-1.625	3.08442	2.58e-17	8.66e-16
ACX60_01990	mlaD	mammalian cell entry protein	-1.748	3.35893	2.87e-17	9.52e-16
ACX60_16905	gacA	response regulator	-1.211	2.31498	3.4e-17	1.12e-15
ACX60_13950	algC	phosphomannomutase	-1.03	2.04202	4.67e-17	1.49e-15
ACX60_01600	ACX60_01600	hypothetical protein	-1.273	2.41664	9.06e-16	2.67e-14
ACX60_03605	mreB	rod shape-determining protein MreB	-1.192	2.28469	7.48e-14	1.99e-12
ACX60_15880	ACX60_15880	hypothetical protein	-1.142	2.20687	3.35e-13	8.71e-12
ACX60_14345	bioH	hydrolase	-1.213	2.31819	8.75e-13	2.22e-11
ACX60_10560	bioB	biotin synthase	-1.443	2.71886	1.98e-12	4.86e-11
ACX60_02860	ACX60_02860	hypothetical protein	-1.9	3.73213	2.73e-12	6.49e-11
ACX60_05395	dacA	D-alanyl-D-alanine carboxypeptidase	-1.137	2.19923	3.65e-12	8.62e-11
ACX60_10355	rmlA	nucleotidyl transferase	-1.411	2.65921	4.21e-12	9.86e-11
ACX60_14330	bioC	malonyl-CoA O-methyltransferase	-1.389	2.61897	2.52e-11	5.73e-10
ACX60_02360	ACX60_02360	hypothetical protein	-2.909	7.51097	3.98e-11	8.87e-10
ACX60_03610	mreC	rod shape-determining protein MreC	-1.285	2.43682	9.74e-10	1.99e-08
ACX60_04915	ACX60_04915	hypothetical protein	-1.081	2.1155	1.37e-09	2.75e-08
ACX60_00780	ftsQ	cell division protein FtsQ	-1.167	2.24544	1.57e-09	3.12e-08
ACX60_03675	uppP	UDP-diphosphatase	-1.019	2.02651	4.06e-09	7.91e-08
ACX60_18325	ACX60_18325	hypothetical protein	-2.05	4.14106	9.46e-09	1.8e-07
ACX60_00175	ACX60_00175	membrane protein	-1.281	2.43007	4.07e-08	7.17e-07
ACX60_17855	ampD	N-acetyl-anhydromuranmyl-L-alanine amidase	-1.093	2.13317	1.22e-07	2.08e-06
ACX60_00450	pgpA	phosphatidylglycerophosphatase	-1.136	2.19771	1.88e-07	3.12e-06
ACX60_07345	ACX60_07345	hypothetical protein	-1.179	2.2642	2.36e-07	3.85e-06
ACX60_05960	mrdB	rod shape-determining protein RodA	-1.348	2.54559	2.48e-07	4e-06
ACX60_14325	bioD	dethiobiotin synthetase	-1.118	2.17046	2.49e-07	4e-06
ACX60_03475	erfK	peptidase	-2.165	4.48466	2.18e-06	3.27e-05
ACX60_16435	ACX60_16435	hypothetical protein	-1.006	2.00834	2.52e-06	3.75e-05
ACX60_04565	sigX	RNA polymerase sigma70 factor	-1.551	2.9302	3.31e-06	4.86e-05
ACX60_15010	vacJ	VacJ family lipoprotein	-1.736	3.3311	5.2e-06	7.47e-05
ACX60_17650	ACX60_17650	hypothetical protein	-1.022	2.03073	9.57e-06	0.00013386
ACX60_17805	wbpE	aminotransferase DegT	-1.328	2.51054	0.00015322	0.0017441
ACX60_03615	mreD	rod shape-determining protein MreD	-1.051	2.07197	0.00018035	0.00202346
ACX60_01485	ftsL	cell division protein FtsL	-1.926	3.8	0.00026084	0.00281504
ACX60_03325	typA	GTP-binding protein TypA	1.546	2.92006	1.06e-71	2.35e-69
ACX60_18955	ACX60_18955	hypothetical protein	1.657	3.1536	2.56e-66	4.7e-64
ACX60_05305	dat	diaminobutyrate--2-oxoglutarate aminotransferase	1.71	3.27161	1.05e-55	1.56e-53
ACX60_05310	ddc	2,4-diaminobutyrate decarboxylase	1.333	2.51926	3.4e-49	4.62e-47
ACX60_01730	serA	3-phosphoglycerate dehydrogenase	1.254	2.38502	2.97e-40	3.09e-38
ACX60_16890	hom	homoserine dehydrogenase	1.189	2.27995	4.94e-31	3.5e-29
ACX60_00480	serB	phosphoserine phosphatase	1.291	2.44698	1.33e-28	8.46e-27
ACX60_02535	ksgA	ribosomal RNA small subunit methyltransferase A	1.098	2.14058	4.38e-27	2.58e-25
ACX60_16410	rbfA	ribosome-binding factor A	1.039	2.0548	2.8e-25	1.48e-23
ACX60_03295	oprF	membrane protein	1.485	2.79917	6.09e-22	2.88e-20
ACX60_03960	gltA	type II citrate synthase	1.244	2.36854	4.1e-21	1.8e-19
ACX60_10730	ychF	GTP-binding protein	1.098	2.14058	4.13e-20	1.72e-18
ACX60_17875	rph	ribonuclease PH	1.014	2.0195	8.08e-20	3.27e-18
ACX60_15180	ACX60_15180	hypothetical protein	1.169	2.24856	4.12e-19	1.6e-17
ACX60_00535	ACX60_00535	chemotaxis protein CheY	1.34	2.53151	3.69e-17	1.2e-15
ACX60_06300	purF	amidophosphoribosyltransferase	1.357	2.56152	2.08e-14	5.69e-13
ACX60_03160	trpA	tryptophan synthase subunit alpha	1.158	2.23148	8.1e-14	2.14e-12
csuD	ACX60_06500	protein CsuD	1.44	2.71321	2.03e-12	4.96e-11
ACX60_00530	phoR	histidine kinase	1.051	2.07197	1.05e-11	2.45e-10
ACX60_06480	csuA/B	protein CsuA/B	1.637	3.11018	4.28e-10	8.89e-09
ACX60_00770	murC	UDP-N-acetylmuramate--alanine ligase	1.975	3.93128	8.42e-09	1.61e-07
ACX60_10270	queD	6-carboxy-5,6,7,8-tetrahydropterin synthase	1.032	2.04486	1.1e-08	2.07e-07
ACX60_06630	purD	phosphoribosylamine--glycine ligase	1.079	2.11257	1.68e-08	3.17e-07
ACX60_03865	rpmA	50S ribosomal protein L27	1.561	2.95058	4.92e-07	7.75e-06
ACX60_05080	obg	GTPase obg	2.175	4.51586	2.99e-06	4.44e-05
ACX60_14155	smpB	SsrA-binding protein	1.171	2.25168	7e-06	9.92e-05
ACX60_12260	pyrC	aspartate carbamoyltransferase	1.451	2.73397	6.98e-05	0.00086054
ACX60_05915	rpsB	30S ribosomal protein S2	1.377	2.59728	7.56e-05	0.00092157
ACX60_15460	rsgA	GTPase	1.121	2.17498	0.00028335	0.00301625
ACX60_10225	pyrF	orotidine 5'-phosphate decarboxylase	1.537	2.9019	0.00045548	0.00455334
CuSO4
locus_tag	gene_name	function	logFC	fold change	PValue	q.value
ACX60_15420	lptE	lipoprotein	-2.62438	6.16617	2.02843e-91	3.14204e-88
ACX60_17760	galU	nucleotidyl transferase	-1.55916	2.94682	3.09314e-54	1.59709e-51
ACX60_17750	pgi	glucose-6-phosphate isomerase	-1.8507	3.60674	1.33646e-53	5.91481e-51
ACX60_02775	copB	copper resistance protein CopB	-2.62652	6.17536	1.97203e-49	7.63669e-47
ACX60_12140	ActP2	ATPase (copper translocating protein)	-1.67978	3.2038	8.14113e-47	2.10177e-44
ACX60_05885	sthA	pyridine nucleotide-disulfide oxidoreductase	-1.52147	2.87084	1.74402e-45	4.15612e-43
ACX60_15955	capM	glycosyl transferase	-2.30396	4.9381	8.6088e-44	1.778e-41
ACX60_17745	galE	UDP-galactose-4-epimerase	-1.76869	3.40745	1.05548e-40	1.81659e-38
ACX60_15850	purU	formyltetrahydrofolate deformylase	-1.53428	2.89644	4.47081e-40	7.28977e-38
ACX60_01255	hisF	imidazole glycerol phosphate synthase	-1.42584	2.68671	1.10625e-39	1.71359e-37
ACX60_02770	copA	copper oxidase (copA)	-3.49681	11.2887	2.26921e-37	3.34763e-35
ACX60_01305	hisH	imidazole glycerol phosphate synthase	-1.30859	2.47699	5.59822e-36	7.22637e-34
ACX60_01290	hisA	1-(5-phosphoribosyl)-5-[(5- phosphoribosylamino)methylideneamino] imidazole-4-carboxamide isomerase	-1.25984	2.39469	1.35113e-33	1.67433e-31
ACX60_16440	secG	preprotein translocase subunit SecG	-1.45937	2.74988	1.08588e-29	1.16002e-27
ACX60_13980	minC	septum site-determining protein MinC	-1.41988	2.67563	1.1385e-29	1.17569e-27
ACX60_01310	hisB	imidazoleglycerol-phosphate dehydratase	-1.25321	2.38371	4.00375e-26	3.54389e-24
ACX60_17695	acnD	aconitate hydratase	-1.14583	2.21273	7.87822e-25	6.25813e-23
ACX60_15465	yibN	rhodanese	-1.03777	2.05305	2.68376e-24	2.07857e-22
ACX60_15190	rapZ	glmZ(sRNA)-inactivating NTPase	-1.90862	3.75451	7.393e-22	5.58623e-20
ACX60_02765	ACX60_02765	hypothetical protein (copper oxidase)	-3.21035	9.25573	2.0776e-21	1.53248e-19
ACX60_13985	minD	cell division inhibitor MinD	-1.29826	2.45932	2.67125e-21	1.92454e-19
ACX60_16365	hisE	phosphoribosyl-ATP diphosphatase	-0.995546	1.99383	9.70176e-20	6.67912e-18
ACX60_14955	hisD	histidinol dehydrogenase	-1.12413	2.1797	5.87213e-18	3.87061e-16
ACX60_07890	argF	ornithine carbamoyltransferase	-1.16698	2.24541	4.05778e-14	2.32797e-12
ACX60_14640	bfmR	chemotaxis protein CheY	-1.05392	2.07616	3.0453e-12	1.42944e-10
ACX60_03265	cysI	sulfite reductase	-1.39402	2.6281	5.5464e-12	2.49025e-10
ACX60_02760	cusR	transcriptional regulator	-1.36086	2.56839	1.23314e-11	5.45752e-10
ACX60_17770	lsgF	amylovoran biosynthesis protein AmsE	-1.09233	2.13218	1.76043e-11	7.68143e-10
ACX60_03885	cysG	sirohydrochlorin ferrochelatase	-1.35527	2.55845	1.9686e-11	8.3544e-10
ACX60_02755	cusS	histidine kinase	-1.00754	2.01048	2.39461e-10	9.27313e-09
ACX60_14950	hisC	histidinol-phosphate aminotransferase	-0.966444	1.95402	4.42196e-09	1.57463e-07
ACX60_17830	wzb	protein tyrosine phosphatase (wzb)	-1.92983	3.81011	1.53259e-07	5.05103e-06
ACX60_13380	cycD	sulfate adenylyltransferase subunit 2	-1.54156	2.91109	4.06785e-07	1.28594e-05
ACX60_02360	ACX60_02360	hypothetical protein	-1.96949	3.91629	1.17026e-06	3.48603e-05
ACX60_13375	cysN	sulfate adenylyltransferase subunit 1	-1.14286	2.20819	4.48165e-06	0.000127377
ACX60_04565	sigE	RNA polymerase sigma70 factor (sigmaX)	-1.61116	3.05498	1.02217e-05	0.000280239
ACX60_02420	pssA	CDP-diacylglycerol--serine O-phosphatidyltransferase	-1.00091	2.00126	0.000489555	0.00936199
ACX60_10020	ACX60_10020	hypothetical protein	-1.43672	2.70705	0.000616393	0.0114346
ACX60_18225	ACX60_18225	hypothetical protein	-0.956824	1.94103	0.00165452	0.0261516
ACX60_05970	queF	NADPH-dependent 7-cyano-7-deazaguanine reductase	-1.02973	2.04164	0.00181714	0.0275955
ACX60_18235	ACX60_18235	hypothetical protein	-1.29137	2.44761	0.00204643	0.0306272
ACX60_18405	ACX60_18405	hypothetical protein	-1.61783	3.06913	0.00301082	0.0414556
ACX60_11490	sdaA	serine dehydratase	-1.10359	2.14889	0.0031629	0.0433569
ACX60_11655	ACX60_11655	type VI secretion protein	-0.984154	1.97815	0.00374146	0.0494199
ACX60_07595	ACX60_07595	hypothetical protein	-1.13782	2.20048	0.00389537	0.0498672
ACX60_16305	rpsO	30S ribosomal protein S15	0.965471	1.9527	0.00237506	0.0342229
ACX60_00740	pyrE	orotate phosphoribosyltransferase	1.14565	2.21246	0.00110992	0.0188931
ACX60_16425	ACX60_16425	hypothetical protein	1.12811	2.18572	0.000321931	0.00643447
ACX60_04580	ACX60_04580	hypothetical protein	1.21304	2.31826	0.000216363	0.00455981
ACX60_16920	ACX60_16920	peptidase S41	1.44301	2.71887	0.000103022	0.0023605
ACX60_02110	rplB	50S ribosomal protein L2	0.994918	1.99297	3.53875e-05	0.000877043
ACX60_03145	ACX60_03145	hypothetical protein	1.01512	2.02107	5.62206e-11	2.29173e-09
ACX60_16435	ACX60_16435	tRNA-Leu	1.34268	2.53621	1.07069e-12	5.26508e-11
ACX60_06555	ACX60_06555	mammalian cell entry protein	1.15166	2.2217	2.74104e-13	1.46409e-11
ACX60_16755	ACX60_16755	DNA-binding protein	1.65876	3.15745	6.06157e-19	4.08233e-17
ACX60_16845	dksA	molecular chaperone DnaK	1.24164	2.36468	9.59516e-21	6.75586e-19
ACX60_14885	rrmp	peptidase C13 family protein	1.30839	2.47666	2.29447e-25	1.92115e-23
ACX60_13750	betA	choline dehydrogenase	1.04802	2.06768	1.32322e-25	1.1387e-23
ACX60_03915	ACX60_03915	hypothetical protein	1.07352	2.10456	2.20612e-26	2.07108e-24
ACX60_01520	ponA	penicillin-binding protein	1.07401	2.10528	8.14442e-27	7.88482e-25
ACX60_15390	ydcR	diguanylate cyclase	1.77219	3.41572	3.20543e-29	3.20336e-27
ACX60_03745	dcaP	DcaP-like protein	2.10396	4.29887	4.71022e-30	5.21152e-28
ACX60_15200	panB	3-methyl-2-oxobutanoate hydroxymethyltransferase	2.8474	7.197	1.309e-30	1.50195e-28
ACX60_02280	rnr	ribonuclease R	1.10276	2.14765	4.73503e-33	5.64197e-31
ACX60_03910	dhaT_1	alcohol dehydrogenase	1.14296	2.20833	1.80005e-36	2.42459e-34
ACX60_15210	pcnB	poly(A) polymerase	1.37133	2.58708	4.51797e-37	6.36212e-35
ACX60_15855	kstR2_1	TetR family transcriptional regulator	1.31149	2.48197	7.4314e-42	1.35426e-39
ACX60_05845	cph2_5	histidine kinase	4.2756	19.368	7.68191e-43	1.48741e-40
ACX60_09775	ACX60_09775	membrane protein	1.482	2.79337	7.45209e-45	1.64904e-42
ACX60_05355	sohB	peptidase S49	1.97731	3.93759	3.92411e-47	1.10517e-44
ACX60_16905	sirA	response regulator	3.43056	10.782	7.97003e-49	2.46912e-46
ACX60_13270	ACX60_13270	membrane protein	2.23668	4.7131	4.00041e-49	1.37703e-46
ACX60_01360	acr1	fatty acyl-CoA reductase	1.5428	2.91359	5.99459e-60	3.71425e-57
ACX60_15250	gacS	chemotaxis protein CheY	3.34898	10.1893	3.76937e-64	2.91938e-61
ACX60_13930	ACX60_13930	hemerythrin	1.88625	3.69672	2.47449e-69	2.55532e-66
ACX60_05485	ACX60_05485	pseudogene	3.43172	10.7908	6.60871e-225	2.04738e-221

## Sheet: Supplementary Table 2
Supplementary table 2. List of genes with significant change in expression relative to untreated wild-type A. baumannii strain ATCC 17978 zinc and copper stresses detected by RNA sequencing. Locus tags are from ATCC 17978 (NCBI accession number: CP012004.1), *ES stands for early stationry phase.
		dksA vs wild-type				dksA+Cu vs wild-type						dksA+Zn vs wild-type						Wild-type +Cu vs wild-type						Wild-type +Zn vs wild-type						dksA_ES vs wild-type_ES*
Locus_tag	Gene	logFC	fold change	Padj		Locus_tag	gene	logFC	fold change	Padj		locus_tag	gene_name_EN	logFC	fold change	Padj		locus_tag	gene_name_EN	logFC	fold change	Padj		locus_tag	gene_name_EN	logFC	fold change	Padj		locus_tag	gene_name_EN	logFC	fold change	Padj
ACX60_00905	acsA	-3.16436	8.96533	6.00429e-08		ACX60_03570	ACX60_03570	-6.83731	114.35	0.0033404		ACX60_16845	dksA	-6.79601	111.122	2.41111e-08		ACX60_11815	ycsG	-5.26928	38.5666	2.87627e-09		ACX60_12085	ACX60_12085	-5.9319	61.0494	1.46516e-06		ACX60_08515	ACX60_08515	-6.83548	114.205	0.00133729
ACX60_15860	calB	-2.88648	7.39466	7.17105e-08		ACX60_11455	paaF	-6.82942	113.726	0.00466926		ACX60_14520	ygxB	-4.17745	18.0941	2.41111e-08		ACX60_06495	csuC	-6.00385	64.1709	5.58419e-08		ACX60_14520	ygxB	-2.9753	7.86418	3.42332e-06		ACX60_08500	gatA	-6.21935	74.5091	9.49205e-05
ACX60_04390	cycA	-2.81397	7.03215	7.17105e-08		ACX60_11815	ycsG	-6.54597	93.44	2.68179e-10		ACX60_04390	cycA	-2.96288	7.79678	3.10776e-08		ACX60_14705	metE	-3.84963	14.4163	7.4051e-08		ACX60_11795	bccA	-4.54575	23.3564	6.97688e-06		ACX60_04310	ACX60_04310	-6.15777	71.3959	0.00588171
ACX60_16845	dksA	-4.78916	27.6491	1.47396e-07		ACX60_11810	ybgL	-6.1307	70.0687	6.8747e-08		ACX60_13345	aceA	-4.18521	18.1917	1.84473e-07		ACX60_06490	csuB	-5.59881	48.463	7.91649e-08		ACX60_13345	aceA	-3.23493	9.41481	6.97688e-06		ACX60_08525	hcaA2	-5.78323	55.0714	0.000487478
ACX60_00945	yjcH	-4.59132	24.1059	1.57156e-07		ACX60_05790	ACX60_05790	-5.982	63.2066	6.24674e-07		ACX60_09940	glcB	-3.60081	12.1326	1.84473e-07		ACX60_06480	csuA/B	-4.19642	18.3336	1.01833e-07		ACX60_03585	pfpI	-2.49844	5.65073	6.97688e-06		ACX60_13630	padH	-5.46044	44.0306	0.0417883
ACX60_13345	aceA	-4.15891	17.8631	1.63533e-07		ACX60_11805	ACX60_11805	-5.91371	60.2842	5.58459e-07		ACX60_00935	ACX60_00935	-3.71756	13.1552	3.44076e-07		ACX60_06485	csuA	-8.48262	357.703	1.14328e-07		ACX60_11805	ACX60_11805	-4.85239	28.8879	2.01891e-05		ACX60_12385	ACX60_12385	-5.39632	42.1166	0.0479982
ACX60_05315	ACX60_05315	-6.74024	106.909	3.04593e-07		ACX60_16845	dksA	-5.77457	54.7416	6.52556e-09		ACX60_10795	btuE	-3.2008	9.1947	5.63629e-07		ACX60_03745	ropAch1	-3.08806	8.50349	1.71625e-07		ACX60_11810	ybgL	-4.1108	17.2772	2.01891e-05		ACX60_11225	ACX60_11225	-5.25123	38.0871	0.00147573
ACX60_00110	metP	-4.47811	22.2867	3.04593e-07		ACX60_11795	bccA	-5.74053	53.4654	9.68891e-08		ACX60_01060	ycaC	-3.14725	8.85964	5.63629e-07		ACX60_06500	csuD	-4.69303	25.8669	2.55742e-07		ACX60_11300	yngG	-3.43994	10.8524	2.69597e-05		ACX60_14355	otsA	-4.84259	28.6923	7.91909e-06
ACX60_04355	ydeP	-3.12799	8.74217	3.04593e-07		ACX60_09055	ACX60_09055	-5.71994	52.7075	0.0222495		ACX60_04030	ACX60_04030	-3.01087	8.06049	8.29911e-07		ACX60_17590	alr	-2.34953	5.09658	6.94873e-07		ACX60_14705	metE	-2.67065	6.36716	3.78208e-05		ACX60_07095	ACX60_07095	-4.75271	26.9592	0.00263255
ACX60_11475	paaB	-5.70845	52.2897	3.27622e-07		ACX60_11450	paaG	-5.66558	50.7587	1.57584e-05		ACX60_04165	kgtP_1	-2.49749	5.64701	1.6109e-06		ACX60_05755	ACX60_05755	-2.41681	5.33988	1.43603e-06		ACX60_14530	ACX60_14530	-3.0119	8.06626	3.98242e-05		ACX60_14660	ACX60_14660	-4.74786	26.8688	0.000102714
ACX60_05325	ipdC	-5.65578	50.415	4.75056e-07		ACX60_00600	ACX60_00600	-5.62723	49.4271	0.0279802		ACX60_03585	pfpI	-2.77228	6.83186	1.6593e-06		ACX60_11810	ybgL	-4.71904	26.3374	1.63222e-06		ACX60_11815	ycsG	-2.83134	7.11734	4.82363e-05		ACX60_14350	otsB	-4.70055	26.002	0.00235758
ACX60_11485	paaN	-5.32908	40.1987	4.75056e-07		ACX60_10680	gltJ	-5.60018	48.5088	7.08025e-08		ACX60_10605	yyaM	-4.12593	17.4594	1.7755e-06		ACX60_11795	bccA	-4.42769	21.5212	3.17398e-06		ACX60_10605	yyaM	-3.01223	8.06811	0.000105078		ACX60_06410	ACX60_06410	-4.6502	25.1101	0.0011913
ACX60_02305	ACX60_02305	-2.70125	6.50364	4.75056e-07		ACX60_10645	ACX60_10645	-5.45748	43.9405	2.7103e-09		ACX60_04875	ACX60_04875	-4.17969	18.1223	2.42509e-06		ACX60_17785	ACX60_17785	-2.56745	5.92761	3.8948e-06		ACX60_00385	hutH	-2.14657	4.42773	0.000105078		ACX60_16845	dksA	-4.61545	24.5126	3.93483e-07
ACX60_11815	ycsG	-3.8135	14.0597	6.12366e-07		ACX60_11800	ybgK	-5.42386	42.9284	7.81264e-06		ACX60_14975	raiA	-3.26929	9.6417	2.42509e-06		ACX60_17325	atpH	-2.68965	6.45156	4.05724e-06		ACX60_17720	dld	-3.13108	8.76092	0.000122218		ACX60_12125	ACX60_12125	-4.52684	23.0523	0.0162748
ACX60_10685	gltI	-3.23352	9.40558	6.12366e-07		ACX60_10715	metQ3	-5.25364	38.1506	0.000408321		ACX60_10800	msrB	-2.83348	7.12792	2.57879e-06		ACX60_09895	prlC	-2.13014	4.37761	4.24942e-06		ACX60_17885	ACX60_17885	-3.50875	11.3826	0.000124438		ACX60_11240	ACX60_11240	-4.47358	22.2169	0.0055523
ACX60_02260	ACX60_02260	-3.06489	8.36805	6.12366e-07		ACX60_11445	paaH	-5.19981	36.7535	2.82905e-05		ACX60_17995	ACX60_17995	-2.83693	7.14499	2.90812e-06		ACX60_11805	ACX60_11805	-5.07655	33.7437	4.86236e-06		ACX60_14710	ACX60_14710	-2.55081	5.85962	0.000178867		ACX60_12050	ACX60_12050	-4.39192	20.9942	0.00321104
ACX60_14520	ygxB	-3.13266	8.77052	6.46096e-07		ACX60_05325	ipdC	-5.09855	34.2623	3.50232e-07		ACX60_16605	ACX60_16605	-2.79484	6.93952	4.55877e-06		ACX60_06455	gltS	-3.85676	14.4878	4.86473e-06		ACX60_09940	glcB	-2.14473	4.42209	0.00018056		ACX60_00910	yddQ	-4.33809	20.2253	0.00393114
ACX60_09235	scoA	-3.99058	15.8959	7.4572e-07		ACX60_15375	ACX60_15375	-5.0224	32.5006	0.00309481		ACX60_00110	metP	-3.52013	11.4727	5.3852e-06		ACX60_12085	ACX60_11810	-4.95163	30.945	5.59823e-06		ACX60_11360	alr	-2.31397	4.97249	0.000212835		ACX60_08510	ACX60_08510	-4.27701	19.3869	0.0103079
ACX60_11300	yngG	-4.33827	20.2278	1.27841e-06		ACX60_17885	ACX60_17885	-4.99829	31.9621	8.92507e-07		ACX60_12230	gst	-3.07886	8.44949	5.94025e-06		ACX60_17780	ACX60_17780	-2.59929	6.05987	6.2385e-06		ACX60_02260	ACX60_02260	-1.98535	3.95959	0.000260442		ACX60_08505	ACX60_08505	-4.18286	18.1621	0.00187671
ACX60_04030	ACX60_04030	-2.8278	7.09991	1.31092e-06		ACX60_11470	paaC	-4.98734	31.7205	2.06132e-06		ACX60_16565	fadA	-2.2947	4.90651	5.94025e-06		ACX60_17300	ACX60_17300	-2.84913	7.20566	6.25217e-06		ACX60_01970	srmB	-1.68934	3.2251	0.000277923		ACX60_06425	ygiW	-4.13798	17.6058	0.0252354
ACX60_13835	ggt	-3.35397	10.2246	1.36268e-06		ACX60_07370	ACX60_07370	-4.91754	30.2223	7.44698e-08		ACX60_04355	ydeP	-2.50619	5.68116	5.95542e-06		ACX60_12915	ydcW	-3.22976	9.3811	9.35481e-06		ACX60_08645	cpo	-2.13644	4.39676	0.000296427		ACX60_14525	ACX60_14525	-4.13277	17.5424	4.74368e-07
ACX60_16335	pap	-2.04	4.11247	1.98918e-06		ACX60_07365	ACX60_07365	-4.82656	28.3753	0.00207195		ACX60_00905	acsA	-2.12348	4.35743	6.06718e-06		ACX60_16425	rimP	-1.99731	3.99255	1.17789e-05		ACX60_11800	ybgK	-4.00713	16.0792	0.000327505		ACX60_11220	ACX60_11220	-4.05918	16.67	0.000321661
ACX60_10465	putA	-3.38632	10.4564	2.02457e-06		ACX60_17555	acs-2	-4.79318	27.7262	0.0003666		ACX60_10495	yceI	-2.58423	5.99697	6.94319e-06		ACX60_17330	atpF	-2.78528	6.89371	1.36052e-05		ACX60_06150	ACX60_06150	-1.62723	3.0892	0.000327505		ACX60_07370	ACX60_07370	-4.05632	16.637	4.93885e-06
ACX60_11470	paaC	-5.40223	42.2895	2.32398e-06		ACX60_11410	ACX60_11410	-4.7682	27.2502	0.000471846		ACX60_15860	calB	-1.99429	3.98419	7.42992e-06		ACX60_09880	gsiA	-1.93775	3.83107	1.40411e-05		ACX60_05470	cstA	-1.56221	2.95307	0.000391508		ACX60_00260	ACX60_00260	-3.79354	13.8665	9.49205e-05
ACX60_00950	actP	-4.27226	19.3231	2.32398e-06		ACX60_13835	ggt	-4.7147	26.2582	7.17806e-09		ACX60_03400	yegP	-3.25219	9.52814	7.65212e-06		ACX60_00155	ppc	-2.31479	4.97533	1.52922e-05		ACX60_12255	ACX60_12255	-2.03255	4.09129	0.000526215		ACX60_04030	ACX60_04030	-3.77993	13.7364	7.04306e-08
ACX60_00935	ACX60_00935	-3.0428	8.24089	2.48782e-06		ACX60_11465	paaD	-4.69877	25.9699	0.000189792		ACX60_12225	ACX60_12225	-3.19783	9.17575	7.94411e-06		ACX60_15860	calB	-1.7833	3.44213	1.99775e-05		ACX60_05950	rlpA	-2.01758	4.04905	0.000526215		ACX60_04070	acnR	-3.71763	13.1558	0.0312848
ACX60_17545	paaF	-2.93122	7.62757	2.48782e-06		ACX60_12685	ACX60_12685	-4.64546	25.0278	0.0497714		ACX60_11205	katE	-2.78853	6.90923	8.81073e-06		ACX60_06925	ACX60_06925	-2.36349	5.14612	3.64593e-05		ACX60_05755	ACX60_05755	-1.61193	3.0566	0.000603386		ACX60_06415	ACX60_06415	-3.70836	13.0716	0.000360039
ACX60_01220	ACX60_01220	-3.09709	8.55693	2.78192e-06		ACX60_11260	ropAch1	-4.63765	24.8927	0.000169523		ACX60_03080	acd	-2.04556	4.12834	9.3389e-06		ACX60_17885	ACX60_05800	-3.66194	12.6576	4.13837e-05		ACX60_11205	katE	-2.01726	4.04814	0.000722066		ACX60_11205	katE	-3.61521	12.2543	4.90711e-07
ACX60_15695	pta	-2.92979	7.62001	2.78192e-06		ACX60_05315	ACX60_05315	-4.62324	24.6452	2.08417e-06		ACX60_03875	Z012_04555	-2.10406	4.29917	9.3487e-06		ACX60_10645	ACX60_10645	-2.50565	5.67906	4.3679e-05		ACX60_06570	ygeA	-2.67793	6.39936	0.000776483		ACX60_01700	lifO	-3.55616	11.7628	0.000247659
ACX60_15175	MA20_29420	-3.21605	9.29241	2.8966e-06		ACX60_11285	mccB	-4.59893	24.2336	1.30214e-06		ACX60_03685	qor	-2.3336	5.04061	1.28615e-05		ACX60_15665	gapN	-2.30671	4.94754	4.3679e-05		ACX60_11080	yghU	-1.70478	3.25978	0.000857497		ACX60_09420	ACX60_09420	-3.51847	11.4595	3.23992e-05
ACX60_12915	ydcW	-3.54321	11.6577	3.58718e-06		ACX60_00950	actP	-4.59326	24.1384	2.9474e-07		ACX60_10645	ACX60_10645	-2.87502	7.33614	1.41606e-05		ACX60_13820	ACX60_13820	-2.04485	4.12629	4.60353e-05		ACX60_04250	mltF	-2.2428	4.73315	0.000892042		ACX60_04355	ydeP	-3.46462	11.0396	1.2216e-07
ACX60_11440	pcaF	-5.55569	47.0359	3.77776e-06		ACX60_17565	mmsA	-4.49544	22.556	2.2895e-06		ACX60_10685	gltI	-2.48828	5.61108	1.6503e-05		ACX60_00415	murI	-2.30652	4.94687	4.91703e-05		ACX60_09895	prlC	-1.50184	2.83203	0.000892042		ACX60_17155	ACX60_17155	-3.4448	10.889	1.2216e-07
ACX60_17885	ACX60_17885	-4.62418	24.6613	3.79199e-06		ACX60_02455	ACX60_02455	-4.45205	21.8877	0.00945179		ACX60_00695	hpf	-3.29337	9.80402	1.76064e-05		ACX60_11800	ybgK	-4.63279	24.809	5.2616e-05		ACX60_11450	paaG	-3.1068	8.61472	0.000930379		ACX60_01715	ACX60_01715	-3.43914	10.8464	0.000148413
ACX60_11810	ybgL	-4.41327	21.3073	3.79199e-06		ACX60_11460	paaE	-4.4069	21.2133	0.00035946		ACX60_01050	gabD	-1.9817	3.94958	1.7638e-05		ACX60_13835	ggt	-2.41847	5.34603	5.35885e-05		ACX60_13835	ggt	-2.02254	4.06299	0.000930569		ACX60_09100	ACX60_09100	-3.39585	10.5258	0.0477857
ACX60_01060	ycaC	-2.53072	5.7786	3.79199e-06		ACX60_00945	yjcH	-4.39862	21.092	5.60394e-08		ACX60_12315	tas	-2.35432	5.11352	1.96983e-05		ACX60_08195	cydB	-2.3615	5.13904	6.44608e-05		ACX60_12225	ACX60_12225	-2.22457	4.67371	0.000977287		ACX60_14470	ACX60_14470	-3.36052	10.2711	0.000105187
ACX60_09240	scoB	-4.00863	16.096	3.94807e-06		ACX60_11280	ivd	-4.35726	20.4958	3.8676e-06		ACX60_02850	ACX60_02850	-2.35106	5.102	1.9834e-05		ACX60_17585	ACX60_17585	-2.7271	6.62121	6.62539e-05		ACX60_01060	ycaC	-1.69737	3.2431	0.000982554		ACX60_08530	ACX60_08530	-3.34872	10.1874	0.00173143
ACX60_17155	ACX60_17155	-2.49575	5.64021	3.94807e-06		ACX60_11475	paaB	-4.33856	20.2319	1.42986e-06		ACX60_15665	gapN	-2.5121	5.7045	2.03258e-05		ACX60_15695	pta	-2.2184	4.65376	6.62539e-05		ACX60_04875	ACX60_04875	-2.49201	5.62562	0.0010669		ACX60_17565	mmsA	-3.34609	10.1689	4.97373e-05
ACX60_03585	pfpI	-2.40215	5.28592	3.94807e-06		ACX60_01045	gabT	-4.31344	19.8827	1.74772e-05		ACX60_00865	ACX60_00865	-2.68788	6.44367	2.03293e-05		ACX60_13765	mmuM	-3.86864	14.6075	8.29572e-05		ACX60_00390	proY	-2.13908	4.40481	0.0012241		ACX60_08520	antA	-3.32338	10.0101	0.0179965
ACX60_11435	paaK	-3.82725	14.1944	4.40664e-06		ACX60_11485	paaN	-4.2759	19.372	1.31105e-06		ACX60_14270	ygaU	-2.94975	7.72613	2.42545e-05		ACX60_18330	ACX60_18330	-2.01877	4.05238	8.89581e-05		ACX60_06970	VY92_01935	-2.03288	4.0922	0.00149895		ACX60_12995	dadA2	-3.29692	9.82813	0.000105645
ACX60_09580	ybhF	-3.01013	8.05638	4.71919e-06		ACX60_11295	mccA	-4.26657	19.2472	7.24005e-06		ACX60_17375	ACX60_17375	-2.22293	4.66841	3.00514e-05		ACX60_00525	ACX60_00525	-2.11469	4.33097	9.9777e-05		ACX60_15665	gapN	-1.82415	3.54099	0.00149895		ACX60_00905	acsA	-3.29124	9.78956	5.31658e-08
ACX60_17560	mmsB	-3.76332	13.5791	5.52938e-06		ACX60_18390	NA	-4.25264	19.0621	8.67181e-05		ACX60_01220	ACX60_01220	-2.57272	5.94932	3.06095e-05		ACX60_13360	citN	-1.62007	3.0739	0.000178296		ACX60_15695	pta	-1.81942	3.52939	0.00149895		ACX60_18155	ACX60_18155	-3.28852	9.77111	0.00888921
ACX60_01740	ACX60_01740	-2.99761	7.98673	6.3889e-06		ACX60_18380	NA	-4.21226	18.5361	0.00917608		ACX60_17125	ytfL	-1.79546	3.47125	3.48503e-05		ACX60_17315	atpG	-2.51547	5.71783	0.00018171		ACX60_05185	icd	-1.53616	2.90021	0.00149895		ACX60_16585	ACX60_16585	-3.27964	9.71112	1.37948e-05
ACX60_03080	acd	-2.05075	4.14321	6.86632e-06		ACX60_11265	cmoA	-4.19263	18.2855	0.0218221		ACX60_07870	MA20_32330	-2.5879	6.01221	3.48738e-05		ACX60_18435	ACX60_18435	-3.15503	8.90756	0.000182242		ACX60_00110	metP	-2.18083	4.53415	0.00151128		ACX60_17560	mmsB	-3.23785	9.4339	1.82047e-05
ACX60_11450	paaG	-6.21735	74.4063	7.45985e-06		ACX60_09410	acoA	-4.05506	16.6225	0.00271518		ACX60_02075	yjgR	-2.38274	5.21527	3.6622e-05		ACX60_17690	ACX60_17690	-2.00253	4.00701	0.000192036		ACX60_11475	paaB	-2.31188	4.96528	0.00152242		ACX60_05500	ACX60_05500	-3.17006	9.00081	0.0405598
ACX60_03400	yegP	-3.14299	8.83351	7.45985e-06		ACX60_02255	ACX60_02255	-4.02322	16.2596	0.000599564		ACX60_10765	Z012_06190	-2.29368	4.90304	3.73399e-05		ACX60_11130	cjaA	-3.88283	14.7519	0.000193606		ACX60_09385	bdhA	-1.64184	3.12063	0.00152242		ACX60_05875	fadE	-3.162	8.95068	4.93885e-06
ACX60_12255	ACX60_12255	-2.68899	6.44863	7.49306e-06		ACX60_17690	ACX60_17690	-4.00726	16.0808	1.03753e-08		ACX60_01340	ACX60_01340	-2.21739	4.65052	3.87296e-05		ACX60_01950	hemF	-2.96906	7.83025	0.000194289		ACX60_09250	atoB	-2.1428	4.41619	0.00165999		ACX60_11200	ACX60_11200	-3.1508	8.88151	0.00137363
ACX60_01045	gabT	-4.77298	27.3407	8.746e-06		ACX60_10675	gltK	-4.00363	16.0403	1.76295e-05		ACX60_15265	hyi	-2.10668	4.30698	3.95645e-05		ACX60_06935	araJ	-2.5618	5.90442	0.000266296		ACX60_00960	ACX60_00960	-1.51279	2.85361	0.00165999		ACX60_08675	ACX60_08675	-3.14868	8.86843	0.00849985
ACX60_05875	fadE	-2.84962	7.20812	8.746e-06		ACX60_11290	liuC	-3.91405	15.0746	3.24626e-05		ACX60_15695	pta	-2.37163	5.17526	4.43064e-05		ACX60_13385	ACX60_13385	-1.7437	3.34894	0.000276		ACX60_14270	ygaU	-2.11994	4.34677	0.00167229		ACX60_01060	ycaC	-3.09225	8.52827	5.23699e-07
ACX60_14020	ate	-2.18349	4.54252	8.746e-06		ACX60_05330	aroP	-3.88647	14.7892	0.000234463		ACX60_07290	ACX60_07290	-2.25421	4.77072	4.43064e-05		ACX60_03910	ACX60_03910	-1.59644	3.02397	0.000300822		ACX60_00935	ACX60_00935	-1.83722	3.5732	0.00167229		ACX60_15175	ACX60_15175	-3.08726	8.49883	5.90444e-06
ACX60_11285	mccB	-4.18579	18.199	9.55136e-06		ACX60_09405	acoB	-3.88205	14.7439	0.00405367		ACX60_11390	srpA	-1.90373	3.7418	4.43064e-05		ACX60_00110	metP	-2.3581	5.12696	0.000310019		ACX60_09845	rraA	-1.58581	3.00176	0.00167229		ACX60_07070	dhaT	-3.08621	8.49262	0.000142206
ACX60_17565	mmsA	-4.05259	16.594	9.84564e-06		ACX60_06485	csuA	-3.87438	14.6658	7.81264e-06		ACX60_12335	hisZ	-2.17521	4.51652	4.46173e-05		ACX60_17770	lsgF	-2.46439	5.51893	0.000345498		ACX60_00395	hutI	-2.17485	4.51538	0.00188876		ACX60_14975	raiA	-3.0379	8.21292	5.8088e-06
ACX60_17690	ACX60_17690	-2.5548	5.87584	1.07379e-05		ACX60_17560	mmsB	-3.87257	14.6474	2.47639e-06		ACX60_03630	ACX60_03630	-2.94987	7.72677	4.65302e-05		ACX60_14710	ACX60_14710	-2.20946	4.62501	0.000345498		ACX60_02845	yajQ	-1.6656	3.17245	0.00188876		ACX60_15330	acnA	-3.0357	8.20043	5.26201e-06
ACX60_07055	aldA	-3.2227	9.33532	1.11334e-05		ACX60_11270	acsf	-3.8629	14.5495	2.17687e-05		ACX60_04245	ACX60_04245	-3.06488	8.36801	5.30139e-05		ACX60_10925	tauB	-1.81029	3.50713	0.000351893		ACX60_11445	paaH	-3.14968	8.87461	0.0018958		ACX60_14520	ygxB	-3.00621	8.0345	1.81125e-06
ACX60_07370	ACX60_07370	-3.53278	11.5737	1.1756e-05		ACX60_06490	csuB	-3.8431	14.3512	1.33786e-06		ACX60_05185	icd	-1.94061	3.83868	5.55492e-05		ACX60_15485	ACX60_15485	-2.8017	6.97261	0.000352003		ACX60_01045	gabT	-2.6294	6.18767	0.00202583		ACX60_09235	scoA	-2.99402	7.96692	7.91909e-06
ACX60_11205	katE	-2.65286	6.28915	1.20946e-05		ACX60_11480	paaA	-3.83163	14.2375	0.000178919		ACX60_16330	ACX60_16330	-2.9831	7.90683	5.85525e-05		ACX60_11360	alr	-2.03497	4.09815	0.000355265		ACX60_04030	ACX60_04030	-1.5787	2.98701	0.00219859		ACX60_06830	acs-2	-2.99393	7.96643	0.000454316
ACX60_11310	MA20_35585	-3.27047	9.6496	1.34277e-05		ACX60_17430	ACX60_17430	-3.8218	14.1409	0.000372779		ACX60_05470	cstA	-1.72574	3.30751	5.85525e-05		ACX60_06055	yfhL	-3.29664	9.82624	0.000361201		ACX60_06600	dctA	-1.61119	3.05504	0.00236992		ACX60_11210	ACX60_11210	-2.99299	7.96122	0.000242783
ACX60_15690	ackA	-2.57323	5.95142	1.34277e-05		ACX60_09750	alkM	-3.81071	14.0326	0.0199283		ACX60_09845	rraA	-2.11672	4.33707	5.91215e-05		ACX60_05850	rsmE	-3.63635	12.4351	0.000390225		ACX60_12915	ydcW	-1.91659	3.77531	0.00286909		ACX60_14780	ACX60_14780	-2.97695	7.87318	0.00406875
ACX60_17550	mmgC	-2.24696	4.74681	1.43712e-05		ACX60_00110	metP	-3.78541	13.7887	4.53456e-07		ACX60_17620	ACX60_17620	-2.21408	4.63986	6.0821e-05		ACX60_02910	tgt	-2.54368	5.83073	0.000398985		ACX60_17735	lldP	-3.4109	10.6361	0.00317295		ACX60_15710	ACX60_15710	-2.96209	7.79255	0.0227391
ACX60_11465	paaD	-8.36847	330.493	1.52515e-05		ACX60_02260	ACX60_02260	-3.72265	13.2017	1.1426e-08		ACX60_02985	ilvE	-2.03643	4.10228	6.12103e-05		ACX60_16560	fadB	-1.79145	3.46162	0.000403798		ACX60_05790	ACX60_05790	-2.6824	6.41922	0.00345246		ACX60_09240	scoB	-2.93728	7.65964	2.1302e-05
ACX60_11295	mccA	-4.27656	19.3809	1.52515e-05		ACX60_01060	ycaC	-3.69304	12.9334	9.16558e-09		ACX60_07220	ACX60_07220	-2.56397	5.91331	6.30501e-05		ACX60_15675	gntT	-2.21801	4.6525	0.000503688		ACX60_11460	paaE	-3.09606	8.55079	0.00440069		ACX60_06400	ACX60_06400	-2.93011	7.62169	0.00140951
ACX60_09940	glcB	-2.41325	5.32674	1.52704e-05		ACX60_17545	paaF	-3.67173	12.7439	7.08025e-08		ACX60_01780	parA	-2.16284	4.47796	6.32209e-05		ACX60_03960	gltA	-1.89649	3.72305	0.000626755		ACX60_13250	gdhA	-1.66057	3.16142	0.00440069		ACX60_17555	acs-2	-2.89182	7.42206	0.0013622
ACX60_16155	ACX60_16155	-2.05125	4.14465	1.55315e-05		ACX60_11435	paaK	-3.66547	12.6887	3.66322e-06		ACX60_17405	Z012_04450	-1.84859	3.60148	6.94864e-05		ACX60_14600	nuoF	-2.27425	4.83746	0.000626896		ACX60_11435	paaK	-2.04156	4.1169	0.00515657		ACX60_12985	ACX60_12985	-2.89035	7.41452	0.00562488
ACX60_15665	gapN	-2.5007	5.6596	1.73664e-05		ACX60_12915	ydcW	-3.66385	12.6745	1.30449e-06		ACX60_00155	ppc	-2.08163	4.23285	7.27049e-05		ACX60_04235	slt_1	-2.52447	5.75363	0.000659889		ACX60_11440	pcaF	-2.34253	5.07192	0.00538396		ACX60_08540	C1-hpah	-2.8817	7.37017	0.0178366
ACX60_05135	ACX60_05135	-2.34911	5.09509	1.73664e-05		ACX60_11300	yngG	-3.66067	12.6465	2.9037e-06		ACX60_00950	actP	-3.06827	8.38765	0.00010058		ACX60_00945	yjcH	-2.06672	4.18933	0.000662404		ACX60_05315	ACX60_05315	-2.18951	4.5615	0.00584638		ACX60_12255	ACX60_12255	-2.86112	7.26581	5.90444e-06
ACX60_00045	ACX60_00045	-2.32054	4.99519	1.73664e-05		ACX60_09480	ACX60_09480	-3.646	12.5186	0.000271614		ACX60_01345	ACX60_01345	-2.03856	4.10836	0.000101479		ACX60_16650	ACX60_16650	-2.76036	6.77565	0.000666769		ACX60_17190	cysK	-1.53166	2.89118	0.00602435		ACX60_02305	ACX60_02305	-2.83997	7.16007	3.93483e-07
ACX60_11445	paaH	-5.58976	48.16	1.75967e-05		ACX60_10465	putA	-3.61613	12.262	2.30103e-07		ACX60_14020	ate	-1.81982	3.53038	0.000101936		ACX60_11140	glnP7	-3.97775	15.7552	0.000708473		ACX60_15450	ACX60_15450	-1.75213	3.36856	0.00620315		ACX60_08815	ACX60_08815	-2.81765	7.05015	0.041951
ACX60_11805	ACX60_11805	-4.39761	21.0772	1.99381e-05		ACX60_18370	ACX60_18370	-3.60897	12.2013	0.00124018		ACX60_12255	ACX60_12255	-2.18926	4.56073	0.000102229		ACX60_03945	ACX60_03945	-1.92	3.78424	0.000708473		ACX60_17725	lldD	-2.83497	7.13529	0.00700885		ACX60_14420	ACX60_14420	-2.81405	7.03257	0.0487441
ACX60_17405	ACX60_17405	-1.97816	3.9399	2.13957e-05		ACX60_00385	hutH	-3.60216	12.1439	1.08304e-08		ACX60_16335	pap	-1.50392	2.83612	0.000102229		ACX60_17320	atpA	-1.92804	3.80537	0.000730324		ACX60_11465	paaD	-2.5912	6.02599	0.00714515		ACX60_05720	xdhA	-2.80821	7.00413	0.000409518
ACX60_01050	gabD	-1.89432	3.71747	2.27802e-05		ACX60_16075	MA20_23190	-3.59747	12.1045	2.66004e-07		ACX60_03650	ACX60_03650	-2.17086	4.50292	0.000103127		ACX60_11125	cjaA	-2.67072	6.36748	0.00076449		ACX60_13555	mro	-1.78389	3.44353	0.00723528		ACX60_11280	ivd	-2.79517	6.94114	0.000724643
ACX60_03190	lsfA	-1.9374	3.83015	3.12423e-05		ACX60_06390	mmsA	-3.57916	11.9518	0.00543301		ACX60_08645	cpo	-2.18579	4.54974	0.00010459		ACX60_17305	atpC	-2.74817	6.71865	0.000853346		ACX60_11295	mccA	-2.37735	5.19583	0.00781598		ACX60_09470	osmB	-2.7941	6.93597	0.0157511
ACX60_05185	icd	-1.99118	3.97562	3.33938e-05		ACX60_07120	ACX60_07120	-3.57324	11.9029	0.0256241		ACX60_03725	ACX60_03725	-1.89267	3.71321	0.00010459		ACX60_01890	ACX60_01890	-2.08358	4.23859	0.000857023		ACX60_03960	gltA	-1.54775	2.92361	0.00806772		ACX60_08535	ACX60_08535	-2.75388	6.74528	0.00544273
ACX60_04165	kgtP_1	-1.84548	3.59373	3.66161e-05		ACX60_16945	holC	-3.56661	11.8483	0.0117619		ACX60_01620	spoT	-1.86573	3.64453	0.00010459		ACX60_17310	atpD	-2.00175	4.00486	0.000857023		ACX60_01355	ychM	-1.58683	3.00389	0.00918951		ACX60_14115	ACX60_14115	-2.73653	6.66465	0.041951
ACX60_08265	ACX60_08265	-1.95747	3.88379	3.74569e-05		ACX60_10685	gltI	-3.56541	11.8385	3.9774e-08		ACX60_18755	tniA	-1.82359	3.5396	0.000110891		ACX60_05280	ACX60_05280	-1.86387	3.63983	0.000857023		ACX60_15315	ACX60_15315	-1.57667	2.9828	0.00918951		ACX60_13625	sauU	-2.72703	6.62091	0.0407661
ACX60_14800	add	-3.63288	12.4053	3.95186e-05		ACX60_15710	ACX60_15710	-3.53443	11.587	0.00837706		ACX60_17190	cysK	-2.12706	4.36825	0.000113333		ACX60_10930	tauA	-1.72644	3.30911	0.000917542		ACX60_03305	rtcB	-1.60392	3.03968	0.00920657		ACX60_02460	ACX60_02460	-2.69993	6.49771	0.00156959
ACX60_10675	gltK	-3.78582	13.7926	4.0254e-05		ACX60_08080	fruK	-3.53216	11.5687	0.00080998		ACX60_11075	yfcF	-2.39543	5.26133	0.000115294		ACX60_05005	ACX60_05005	-2.49812	5.64949	0.00095157		ACX60_05325	ipdC	-2.21733	4.65033	0.00925286		ACX60_06395	gabP	-2.68918	6.44946	0.00190765
ACX60_03360	namA	-1.71056	3.27287	4.10023e-05		ACX60_17720	dld	-3.52775	11.5335	6.93619e-06		ACX60_02305	ACX60_02305	-1.72689	3.31013	0.000124344		ACX60_04810	ACX60_04810	-1.84136	3.58349	0.000974967		ACX60_05330	aroP	-2.48074	5.58185	0.00930092		ACX60_06085	ACX60_06085	-2.64432	6.25199	0.0190847
ACX60_11795	bccA	-3.52111	11.4805	4.17596e-05		ACX60_03745	ropAch1	-3.52711	11.5283	1.71882e-08		ACX60_00525	ACX60_00525	-2.09972	4.28625	0.000130252		ACX60_18430	ACX60_18430	-2.90795	7.50553	0.00100827		ACX60_14110	yeaW	-1.81843	3.52698	0.0102958		ACX60_03400	yegP	-2.63384	6.20677	7.80521e-05
ACX60_16605	ACX60_16605	-2.24855	4.75204	4.42099e-05		ACX60_03650	ACX60_03650	-3.50295	11.3369	7.28204e-08		ACX60_14470	ACX60_14470	-3.17205	9.01328	0.000150225		ACX60_14595	nuoG	-1.66357	3.16799	0.00110864		ACX60_11285	mccB	-2.19094	4.56604	0.0103766		ACX60_06655	ACX60_06655	-2.63265	6.20164	0.000806459
ACX60_01770	sodC	-1.96018	3.89111	4.50591e-05		ACX60_06405	ACX60_06405	-3.49694	11.2897	0.0402096		ACX60_04425	etfA	-2.14021	4.40826	0.000150315		ACX60_13410	rubB	-2.10484	4.30151	0.00114641		ACX60_00400	hutG	-2.04456	4.12547	0.0106654		ACX60_05140	ACX60_05140	-2.61535	6.1277	0.000517248
ACX60_11290	liuC	-3.96786	15.6475	4.60248e-05		ACX60_04310	ACX60_04310	-3.49574	11.2803	0.0377598		ACX60_09895	prlC	-1.61792	3.06931	0.000176562		ACX60_17790	ACX60_17790	-1.79303	3.46542	0.00122074		ACX60_12055	cspV	-1.97895	3.94206	0.0106654		ACX60_10605	yyaM	-2.59069	6.02386	0.000244077
ACX60_02980	glnE	-1.87134	3.65872	4.62786e-05		ACX60_18365	dotC	-3.4744	11.1147	0.000274515		ACX60_01335	ygfH	-2.18003	4.53163	0.000196756		ACX60_03015	fmt	-2.25729	4.78093	0.00127329		ACX60_02400	ACX60_02400	-1.65947	3.159	0.0112072		ACX60_11365	pobA	-2.57737	5.96851	0.00151351
ACX60_05770	dtpT	-1.70246	3.25455	4.63866e-05		ACX60_02250	ACX60_02250	-3.46385	11.0337	0.000111189		ACX60_03205	yhjE	-1.5207	2.86929	0.000196756		ACX60_18990	ACX60_18990	-1.96135	3.89427	0.00137828		ACX60_10610	ACX60_10610	-1.90714	3.75065	0.0119444		ACX60_05945	ACX60_05945	-2.56272	5.90822	2.63245e-05
ACX60_14305	yciO	-2.5284	5.76932	4.76495e-05		ACX60_17550	mmgC	-3.44704	10.9059	3.35815e-08		ACX60_00945	yjcH	-2.38821	5.23508	0.000213609		ACX60_18335	ACX60_18335	-2.40504	5.29652	0.00145535		ACX60_04125	ACX60_04125	-2.48167	5.58543	0.0121375		ACX60_09575	ybhS	-2.53623	5.80073	0.00562488
ACX60_03685	qor	-2.03091	4.08662	4.76495e-05		ACX60_05190	ACX60_05190	-3.42337	10.7285	0.00683198		ACX60_13340	nlpE	-2.4269	5.37738	0.000218908		ACX60_14565	nuoM	-2.30489	4.9413	0.00147002		ACX60_11425	paaY	-1.83328	3.56346	0.0139324		ACX60_02700	ACX60_02700	-2.52352	5.74983	0.00255069
ACX60_05790	ACX60_05790	-3.96113	15.5747	4.79367e-05		ACX60_04390	cycA	-3.41874	10.6941	4.45141e-10		ACX60_02750	pacS	-1.58428	2.99859	0.000218908		ACX60_04505	ycaI	-1.58708	3.0044	0.00158598		ACX60_00260	ACX60_00260	-2.39652	5.2653	0.0148802		ACX60_17535	ACX60_17535	-2.51729	5.72505	0.00209196
ACX60_10680	gltJ	-2.85062	7.21312	5.27348e-05		ACX60_16625	ompW	-3.41147	10.6403	4.45529e-05		ACX60_01740	ACX60_01740	-2.28814	4.88425	0.000222993		ACX60_02880	yneE	-2.34107	5.0668	0.00161105		ACX60_17445	pltP	-1.59993	3.03129	0.0151584		ACX60_14795	ACX60_14795	-2.50898	5.69216	0.00526991
ACX60_14525	ACX60_14525	-2.61236	6.11505	5.34865e-05		ACX60_01950	hemF	-3.40068	10.561	2.13198e-05		ACX60_11080	yghU	-1.86186	3.63477	0.000223672		ACX60_18345	ACX60_18345	-2.51526	5.71702	0.00162398		ACX60_03460	ecnB	-2.86301	7.27534	0.0163455		ACX60_14785	gcdH	-2.50831	5.68953	7.27391e-07
ACX60_11850	ACX60_11850	-2.12974	4.37637	6.05637e-05		ACX60_06570	ygeA	-3.38735	10.4639	2.99267e-05		ACX60_01800	ACX60_01800	-1.68857	3.22336	0.000225623		ACX60_18205		-1.51991	2.86773	0.00163853		ACX60_03330	mscL	-1.8693	3.65354	0.0167789		ACX60_05130	ACX60_05130	-2.50603	5.68054	2.24928e-05
ACX60_07070	dhaT	-3.29206	9.79511	6.17664e-05		ACX60_00285	ACX60_00285	-3.38404	10.4399	9.9995e-06		ACX60_03330	mscL	-2.83203	7.12076	0.000228637		ACX60_00395	hutI	-2.04941	4.13935	0.00169537		ACX60_10890	ycaC	-1.93823	3.83236	0.0169717		ACX60_13740	betI	-2.47601	5.56358	0.000381102
ACX60_00255	ACX60_00255	-1.83929	3.57834	6.17664e-05		ACX60_14520	ygxB	-3.35321	10.2192	6.33188e-08		ACX60_05045	ycdB	-1.5786	2.98681	0.0002436		ACX60_07305	smvA	-2.30156	4.9299	0.00177489		ACX60_17585	ACX60_17585	-1.62262	3.07935	0.017658		ACX60_09415	lipA	-2.46579	5.52428	0.000519717
ACX60_11210	ACX60_11210	-3.33513	10.0919	6.57854e-05		ACX60_08735	fadD	-3.35243	10.2137	0.0373988		ACX60_11815	ycsG	-2.2732	4.83395	0.000244689		ACX60_15700	fumA	-1.88599	3.69607	0.00178714		ACX60_17880	desA3	-1.55672	2.94184	0.017658		ACX60_02400	ACX60_02400	-2.46473	5.52022	0.00019778
ACX60_03280	ACX60_03280	-3.00968	8.05384	6.75464e-05		ACX60_00935	ACX60_00935	-3.34583	10.167	1.99332e-07		ACX60_00250	ACX60_00250	-2.24617	4.74422	0.000254399		ACX60_00965	ACX60_00965	-2.15825	4.46374	0.00192696		ACX60_03400	yegP	-1.52559	2.87904	0.0182043		ACX60_09530	ACX60_09530	-2.44287	5.43724	0.000309801
ACX60_06400	ACX60_06400	-3.95735	15.5339	7.04099e-05		ACX60_04045	ACX60_04045	-3.34355	10.151	0.00028119		ACX60_03720	hflC	-1.71263	3.27758	0.000255403		ACX60_15450	ACX60_15450	-1.83135	3.5587	0.00210985		ACX60_06655	ACX60_06655	-1.93834	3.83263	0.018722		ACX60_06000	ACX60_06000	-2.43266	5.39889	0.00901123
ACX60_18925	ACX60_18925	-1.93798	3.83168	7.76325e-05		ACX60_06925	ACX60_06925	-3.33854	10.1158	1.99332e-07		ACX60_06150	ACX60_06150	-1.56556	2.95992	0.000269546		ACX60_10955	ACX60_10955	-2.178	4.52525	0.00249433		ACX60_10405	ACX60_10405	-2.04158	4.11697	0.0204817		ACX60_05145	ACX60_05145	-2.42811	5.38188	0.000385217
ACX60_05470	cstA	-1.65074	3.13995	7.96116e-05		ACX60_00390	proY	-3.32507	10.0218	1.56089e-06		ACX60_03745	ropAch1	-1.80623	3.49726	0.000280327		ACX60_16915	pilR	-1.55097	2.93015	0.00251365		ACX60_12805	fcs	-1.63883	3.11413	0.0225763		ACX60_17885	ACX60_17885	-2.42371	5.3655	0.0128804
ACX60_06170	ACX60_06170	-2.98332	7.90802	8.5013e-05		ACX60_18870	ACX60_18870	-3.31704	9.96619	1.63144e-06		ACX60_09385	bdhA	-1.83956	3.57901	0.00028424		ACX60_17195	ACX60_17195	-2.79487	6.93966	0.00254333		ACX60_11565	queH	-1.64166	3.12025	0.0228931		ACX60_03385	ACX60_03385	-2.42029	5.35278	0.000429067
ACX60_10645	ACX60_10645	-2.33579	5.04828	8.5013e-05		ACX60_06600	dctA	-3.30631	9.89231	8.6521e-08		ACX60_01770	sodC	-1.67608	3.19559	0.000309441		ACX60_14585	nuoI	-2.82735	7.0977	0.0025526		ACX60_11290	liuC	-2.03126	4.08761	0.0232537		ACX60_00695	hpf	-2.41994	5.35148	0.000476577
ACX60_17880	desA3	-2.65639	6.30455	9.02052e-05		ACX60_09285	kgtP	-3.29463	9.81259	0.0164144		ACX60_09765	hupB	-2.10601	4.30498	0.000318683		ACX60_00410	gph	-2.49991	5.6565	0.00283267		ACX60_12050	ACX60_12050	-2.8784	7.35333	0.0250605		ACX60_09580	ybhF	-2.39673	5.26609	0.000117989
ACX60_15995	ACX60_15995	-1.85615	3.62039	9.5187e-05		ACX60_15380	ACX60_15380	-3.29149	9.79125	2.30103e-07		ACX60_13835	ggt	-2.08942	4.25577	0.00032911		ACX60_14610	nuoC	-1.84151	3.58385	0.00283322		ACX60_03690	hchA	-1.59375	3.01833	0.0274362		ACX60_07870	ACX60_07870	-2.38839	5.23572	0.000101649
ACX60_11280	ivd	-3.43343	10.8035	0.000101246		ACX60_05360	ACX60_05360	-3.29052	9.78466	7.46864e-08		ACX60_05875	fadE	-2.08346	4.23823	0.000338597		ACX60_13245	ACX60_13245	-2.63694	6.22012	0.00288782		ACX60_07055	aldA	-1.51592	2.85982	0.0279141		ACX60_06585	ACX60_06585	-2.37506	5.18757	0.0186954
ACX60_18035	estA	-2.16475	4.48387	0.000101246		ACX60_12050	ACX60_12050	-3.28633	9.75624	0.00597903		ACX60_11360	alr	-2.05355	4.15128	0.000353495		ACX60_03915	ACX60_03915	-1.5195	2.86691	0.00289724		ACX60_05800	ACX60_05800	-3.64199	12.4839	0.0312764		ACX60_03280	ACX60_03280	-2.37409	5.18407	0.000881612
ACX60_15330	acnA	-2.2394	4.722	0.000104687		ACX60_14735	yxeP_1	-3.26717	9.62759	0.000190939		ACX60_01860	ACX60_01860	-1.79452	3.469	0.000362921		ACX60_15945	MA20_22020	-1.70718	3.26523	0.00293918		ACX60_04245	ACX60_04245	-1.51762	2.86318	0.0317959		ACX60_02250	ACX60_02250	-2.37216	5.17717	0.00321333
ACX60_02750	pacS	-1.65461	3.14837	0.000108332		ACX60_18920	ACX60_18920	-3.24808	9.50098	0.000562041		ACX60_08050	gdhB	-1.68646	3.21866	0.000372444		ACX60_18415	ACX60_18415	-2.57784	5.97047	0.0032259		ACX60_00105	ACX60_00105	-1.66788	3.17748	0.0350665		ACX60_16645	ACX60_16645	-2.35671	5.12202	0.000937712
ACX60_16285	cbpA	-1.76269	3.3933	0.000110514		ACX60_07055	aldA	-3.24265	9.46533	4.19935e-06		ACX60_16285	cbpA	-1.59176	3.01417	0.000380461		ACX60_17775	ACX60_17775	-2.19946	4.59308	0.00330554		ACX60_14470	ACX60_14470	-1.74646	3.35535	0.0370568		ACX60_05135	ACX60_05135	-2.35559	5.11804	2.61444e-05
ACX60_10800	msrB	-1.97408	3.92879	0.000112648		ACX60_08480	ACX60_08480	-3.24177	9.45956	0.00815207		ACX60_01865	ACX60_01865	-1.85759	3.62403	0.000386155		ACX60_14590	nuoH	-2.1879	4.55641	0.00342698		ACX60_09850	yraR	-1.55372	2.93574	0.0441315		ACX60_13790	ACX60_13790	-2.3507	5.10071	0.000724643
ACX60_01715	ACX60_01715	-3.43252	10.7967	0.000113446		ACX60_18925	ACX60_18925	-3.24024	9.44949	4.16556e-08		ACX60_17290	btuE	-2.27175	4.82908	0.000392097		ACX60_12895	cycA	-2.09938	4.28524	0.00346897		ACX60_09400	acoC	-1.63356	3.10278	0.0460728		ACX60_14735	yxeP_1	-2.34839	5.09257	0.00380419
ACX60_15670	gntK	-2.76795	6.81138	0.000118134		ACX60_12325	ACX60_12325	-3.23475	9.41365	4.87755e-06		ACX60_15670	gntK	-2.47211	5.54855	0.000430087		ACX60_01335	ygfH	-1.60877	3.04992	0.00356295		ACX60_11470	paaC	-1.79167	3.46215	0.0466544		ACX60_01855	ACX60_01855	-2.33019	5.02873	0.0450179
ACX60_00865	ACX60_00865	-2.23913	4.72114	0.00013618		ACX60_01430	ACX60_01430	-3.22223	9.33231	6.63745e-05		ACX60_16560	fadB	-1.77268	3.41687	0.000432792		ACX60_09885	oppC	-1.80447	3.49302	0.00369794		ACX60_05005	ACX60_05005	-1.50952	2.84716	0.0466544		ACX60_06390	mmsA	-2.32145	4.99836	0.041951
ACX60_00345	fahA	-2.55498	5.87659	0.000149292		ACX60_00400	hutG	-3.21943	9.31419	6.35477e-05		ACX60_00705	ACX60_00705	-2.0171	4.04769	0.000437203		ACX60_08200	cydA	-2.23659	4.71283	0.00389963		ACX60_10670	gltL	-1.60569	3.04342	0.0484996		ACX60_03585	pfpI	-2.3144	4.97398	1.08973e-05
ACX60_03875	ACX60_03875	-1.6374	3.11105	0.000149292		ACX60_17880	desA3	-3.21298	9.27265	7.70057e-06		ACX60_00255	ACX60_00255	-1.55909	2.94668	0.00044369		ACX60_05420	ACX60_05420	-1.68333	3.21169	0.00399214		ACX60_04120	ACX60_04120	-3.25892	9.57268	0.048857		ACX60_00945	yjcH	-2.30552	4.94346	0.000229715
ACX60_15675	gntT	-2.45886	5.4978	0.000151929		ACX60_10955	ACX60_10955	-3.18833	9.11552	4.18429e-05		ACX60_13355	ytfL	-1.56455	2.95784	0.00044888		ACX60_06505	csuE	-2.94799	7.71671	0.00401636		ACX60_14300	yfcM	-1.78441	3.44477	0.048857		ACX60_09245	atoE	-2.28931	4.88823	0.000336364
ACX60_00155	ppc	-1.91883	3.78115	0.000163254		ACX60_15670	gntK	-3.16905	8.99452	1.39109e-05		ACX60_08285	clpA	-1.57315	2.97554	0.000449941		ACX60_14570	nuoL	-1.99199	3.97786	0.00402282		ACX60_06780	yvbT	4.86971	29.2368	4.08862e-09		ACX60_10610	ACX60_10610	-2.27821	4.85075	0.00147252
ACX60_01620	spoT	-1.753	3.3706	0.000184189		ACX60_00395	hutI	-3.12472	8.72235	1.09812e-05		ACX60_14305	yciO	-2.06661	4.18901	0.000458681		ACX60_17335	atpE	-2.25934	4.78773	0.00411746		ACX60_14785	gcdH	3.07007	8.39812	4.33606e-08		ACX60_08395	pcaK	-2.27754	4.84852	0.0218341
ACX60_14785	gcdH	-1.58536	3.00082	0.000186028		ACX60_15175	MA20_29420	-3.12193	8.70553	1.59934e-06		ACX60_10770	purT	-1.60007	3.03159	0.000462059		ACX60_11300	yngG	-1.8971	3.72463	0.00420586		ACX60_01025	azlC	4.7125	26.2182	1.46516e-06		ACX60_12830	hcaG	-2.27067	4.82546	0.00713761
ACX60_15655	ACX60_15655	-2.51207	5.70439	0.000186535		ACX60_06055	yfhL	-3.11496	8.66353	0.000303178		ACX60_14525	ACX60_14525	-2.15716	4.46037	0.000464045		ACX60_16500	yrrK	-2.42833	5.38269	0.00428981		ACX60_10570	ACX60_10570	5.98968	63.5439	1.46516e-06		ACX60_07785	moaA	-2.25019	4.75745	0.000377103
ACX60_15945	MA20_22020	-2.2483	4.75122	0.000187729		ACX60_10670	gltL	-3.10478	8.60264	0.000187348		ACX60_13230	lon	-2.30063	4.92672	0.000478065		ACX60_17845	fkpB	-1.7486	3.36031	0.00433203		ACX60_13160	czcD_1	5.65472	50.3781	1.649e-06		ACX60_15655	ACX60_15655	-2.23477	4.70688	0.000625586
ACX60_00725	ACX60_00725	-1.6295	3.09406	0.000191286		ACX60_07870	MA20_32330	-3.10316	8.59299	1.14156e-06		ACX60_03705	prpF	-1.5079	2.84395	0.000509515		ACX60_00455	thiL	-2.1966	4.58397	0.00442535		ACX60_04270	dhbF	3.94115	15.3605	1.66962e-06		ACX60_11310	ACX60_11310	-2.22743	4.68299	0.000806459
ACX60_11200	ACX60_11200	-4.26655	19.2468	0.000192158		ACX60_11440	pcaF	-3.09993	8.5738	0.000269514		ACX60_08235	pldA	-2.39685	5.26653	0.000536226		ACX60_10680	gltJ	-1.81261	3.51276	0.00443652		ACX60_00880	xenB	3.99522	15.9471	3.42332e-06		ACX60_01390	ACX60_01390	-2.2237	4.67091	0.0130897
ACX60_04175	glpD	-1.86825	3.65089	0.000192158		ACX60_18405	NA	-3.08628	8.49305	0.031551		ACX60_04420	etfB	-2.38181	5.2119	0.000536226		ACX60_12230	gst	-1.58459	2.99922	0.00466694		ACX60_03750	eptA	2.78048	6.87083	6.97688e-06		ACX60_07205	ACX60_07205	-2.21094	4.62975	0.00594011
ACX60_10795	btuE	-1.81915	3.52872	0.000196814		ACX60_12255	ACX60_12255	-3.08203	8.46802	4.53906e-07		ACX60_16015	leuB	-1.71659	3.2866	0.000536226		ACX60_05450	ACX60_05450	-1.96	3.89062	0.00471175		ACX60_17935	ssuA	4.05389	16.6089	6.97688e-06		ACX60_12030	ACX60_12030	-2.20322	4.60507	0.000591558
ACX60_08470	ACX60_08470	-1.87282	3.66247	0.000208591		ACX60_02305	ACX60_02305	-3.07011	8.39836	1.77614e-08		ACX60_16940	pepA	-2.09254	4.26499	0.00056438		ACX60_14580	nuoJ	-1.71539	3.28385	0.00472639		ACX60_09515	yafE	3.97974	15.7769	2.01891e-05		ACX60_17550	mmgC	-2.20288	4.60397	1.85677e-05
ACX60_12230	gst	-2.18019	4.53214	0.000215649		ACX60_09400	acoC	-3.0573	8.32412	0.000242182		ACX60_17690	ACX60_17690	-1.7978	3.47689	0.000590346		ACX60_08940	ACX60_08940	-2.36387	5.1475	0.00482658		ACX60_17415	yqjI	4.16193	17.9005	2.01891e-05		ACX60_16605	ACX60_16605	-2.19246	4.57084	8.9688e-05
ACX60_11460	paaE	-4.65665	25.2227	0.000215918		ACX60_05440	yfeH	-3.05451	8.30807	3.3568e-05		ACX60_05765	pepP	-1.55946	2.94744	0.000610401		ACX60_07725	accC	-2.14389	4.41951	0.00482658		ACX60_10920	tauC	2.91452	7.53976	2.69597e-05		ACX60_12805	fcs	-2.18776	4.55598	0.0018712
ACX60_17720	dld	-2.70871	6.53736	0.000215918		ACX60_15695	pta	-3.04021	8.22613	5.52845e-07		ACX60_12285	cinA	-2.06041	4.17106	0.000615358		ACX60_13830	ACX60_13830	-2.04739	4.13358	0.00498206		ACX60_04450	ACX60_04450	4.1914	18.27	3.66554e-05		ACX60_12155	benA	-2.17969	4.53056	0.0171102
ACX60_17995	ACX60_17995	-1.86852	3.65157	0.000237821		ACX60_18760	ACX60_18760	-3.03864	8.21717	1.39432e-06		ACX60_11810	ybgL	-2.70013	6.4986	0.000702234		ACX60_00950	actP	-1.96717	3.91001	0.00510643		ACX60_12220	ahpF	3.06487	8.36793	3.78208e-05		ACX60_14900	yrdA	-2.17951	4.53	0.045592
ACX60_10670	gltL	-3.08959	8.51255	0.000240385		ACX60_00905	acsA	-3.0283	8.15845	9.19168e-09		ACX60_07370	ACX60_07370	-2.40181	5.28466	0.000705701		ACX60_07645	ACX60_07645	-2.05627	4.1591	0.00517491		ACX60_05895	yhjX_2	3.93686	15.3148	3.78208e-05		ACX60_12150	benM	-2.17784	4.52476	0.0140916
ACX60_02250	ACX60_02250	-3.22304	9.33752	0.000241558		ACX60_02670	NA	-3.02098	8.11718	0.0016653		ACX60_17545	paaF	-1.7829	3.44117	0.000718071		ACX60_11295	mccA	-2.29473	4.90663	0.005178		ACX60_10930	tauA	2.3895	5.23976	6.44722e-05		ACX60_14020	ate	-2.15357	4.44928	1.85677e-05
ACX60_10495	yceI	-1.831	3.55783	0.0002584		ACX60_03205	yhjE	-2.9989	7.9939	7.24446e-09		ACX60_11935	uspA	-1.50057	2.82955	0.000796675		ACX60_17340	atpB	-1.71547	3.28404	0.00535205		ACX60_04905	cysP	3.07648	8.43556	6.44722e-05		ACX60_16640	ACX60_16640	-2.1404	4.40884	0.0121251
ACX60_11270	acsf	-3.095	8.5445	0.000273414		ACX60_01300	ACX60_01300	-2.9489	7.72162	1.08809e-05		ACX60_15690	ackA	-1.78653	3.44984	0.000829768		ACX60_13490	atsA	-2.24024	4.72477	0.00562572		ACX60_00920	sfnG	2.0325	4.09114	0.000105078		ACX60_02750	pacS	-2.13335	4.38736	7.65612e-06
ACX60_11480	paaA	-3.87585	14.6808	0.0003033		ACX60_00755	ACX60_00755	-2.94612	7.70675	0.0170484		ACX60_14250	ACX60_14250	-2.32442	5.00863	0.000897885		ACX60_01820	argD	-1.61892	3.07146	0.00562572		ACX60_10915	tauD	2.36056	5.13569	0.000105078		ACX60_13500	ACX60_13500	-2.13271	4.3854	0.0474546
ACX60_05145	ACX60_05145	-2.37898	5.20168	0.000310684		ACX60_00420	ACX60_00420	-2.93557	7.6506	0.0218702		ACX60_09660	mtlD	-1.67639	3.19628	0.000900386		ACX60_00350	aroP	-1.7531	3.37082	0.00576593		ACX60_06020	mexE	4.00657	16.073	0.000105078		ACX60_11285	mccB	-2.11882	4.34337	0.00610011
ACX60_04545	ACX60_04545	-1.94006	3.83721	0.000310684		ACX60_02460	ACX60_02460	-2.92159	7.57678	0.000175351		ACX60_13045	ACX60_13045	-1.98085	3.94726	0.00090742		ACX60_01940	ACX60_01940	-1.86128	3.63329	0.00598415		ACX60_08600	catB	1.97274	3.92513	0.000105854		ACX60_08420	quiC	-2.10298	4.29597	0.0154849
ACX60_02400	ACX60_02400	-2.36894	5.16563	0.000336741		ACX60_17100	fadD	-2.9213	7.57527	4.64023e-08		ACX60_03460	ecnB	-3.77415	13.6814	0.000922466		ACX60_18985	ACX60_18985	-1.69853	3.24571	0.00600201		ACX60_10925	tauB	2.15617	4.45729	0.000105854		ACX60_05575	yhhW	-2.1026	4.29484	0.00500145
ACX60_03650	ACX60_03650	-1.91641	3.77483	0.000337629		ACX60_18625	ACX60_18625	-2.88623	7.39337	0.0364641		ACX60_17615	ACX60_17615	-1.69818	3.2449	0.000946351		ACX60_11565	queH	-1.80791	3.50134	0.00609998		ACX60_00980	ACX60_00980	2.5011	5.66118	0.000123184		ACX60_00280	yfdC	-2.10178	4.29239	0.0267151
ACX60_00695	hpf	-2.46065	5.50466	0.000338256		ACX60_18755	tniA	-2.88057	7.36442	8.22858e-08		ACX60_15450	ACX60_15450	-1.97588	3.93367	0.00096723		ACX60_12055	cspV	-1.99548	3.98748	0.00664684		ACX60_11750	ACX60_11750	3.558	11.7778	0.000189689		ACX60_06825	mmgC	-2.10006	4.28728	0.00152763
ACX60_05330	aroP	-3.69474	12.9487	0.000343722		ACX60_08470	ACX60_08470	-2.87141	7.3178	7.43253e-07		ACX60_06400	ACX60_06400	-3.06617	8.37549	0.00100836		ACX60_06525	ACX60_06525	-2.31866	4.98868	0.0067077		ACX60_10845	ahpF	2.65221	6.28628	0.000256072		ACX60_02475	atuA	-2.08758	4.25036	0.00747698
ACX60_03210	yqfA	-1.67111	3.1846	0.00037968		ACX60_17735	lldP	-2.8697	7.30914	0.00367146		ACX60_02375	ybeZ	-1.67891	3.20185	0.00102199		ACX60_13930	ACX60_13930	-1.96822	3.91286	0.006845		ACX60_01125	ACX60_01125	1.73126	3.32018	0.000296427		ACX60_06570	ygeA	-2.07557	4.21511	0.00247845
ACX60_00390	proY	-2.18922	4.56059	0.000390129		ACX60_13825	immA	-2.86304	7.27547	0.00970585		ACX60_03095	ACX60_03095	-1.90413	3.74283	0.00107154		ACX60_17570	ACX60_17570	-1.91229	3.76407	0.00694201		ACX60_10855	ACX60_10855	5.32196	40.001	0.000319359		ACX60_11260	ropAch1	-2.07146	4.2031	0.0182157
ACX60_06175	pepD	-2.1425	4.41528	0.000402781		ACX60_00250	ACX60_00250	-2.86087	7.26454	6.70812e-06		ACX60_10465	putA	-1.898	3.72695	0.00108518		ACX60_13115	ACX60_13115	-2.22445	4.67332	0.00747664		ACX60_01405	czcC	2.10111	4.2904	0.000327505		ACX60_06260	ACX60_06260	-2.063	4.17855	0.0258754
ACX60_05140	ACX60_05140	-2.56118	5.90191	0.000412544		ACX60_09415	lipA	-2.84471	7.18364	0.000476691		ACX60_13555	mro	-2.00516	4.01433	0.00111262		ACX60_05790	ACX60_05790	-2.21712	4.64963	0.00787911		ACX60_00875	arsR	4.19548	18.3216	0.000327505		ACX60_16060	katG	-2.05812	4.16442	0.000162903
ACX60_03705	prpF	-1.51256	2.85316	0.000428693		ACX60_08265	ACX60_08265	-2.84432	7.18169	1.23429e-07		ACX60_15315	ACX60_15315	-1.84995	3.60487	0.00122518		ACX60_13405	rubA	-2.54981	5.85559	0.00791792		ACX60_02335	MA20_23245	2.32315	5.00423	0.000380069		ACX60_11290	liuC	-2.05724	4.16188	0.00968854
ACX60_00385	hutH	-1.70248	3.2546	0.000447976		ACX60_08205	ACX60_08205	-2.83506	7.13571	0.000495935		ACX60_06600	dctA	-1.60501	3.04199	0.00122777		ACX60_12905	argD	-1.99849	3.9958	0.00881088		ACX60_14855	ACX60_14855	2.38436	5.22114	0.000495001		ACX60_04175	glpD	-2.05188	4.14646	0.000102714
ACX60_14110	yeaW	-2.42095	5.35523	0.000481054		ACX60_04030	ACX60_04030	-2.81813	7.05248	3.2305e-07		ACX60_05775	glnA	-2.03728	4.1047	0.001279		ACX60_01240	aqpZ	-1.92558	3.79888	0.0090788		ACX60_11135	glnQ	2.43739	5.41662	0.000562829		ACX60_15690	ackA	-2.05121	4.14452	0.000232574
ACX60_17555	acs-2	-4.25294	19.0662	0.000509283		ACX60_10765	ACX60_10765	-2.8125	7.02499	8.95974e-07		ACX60_17885	ACX60_17885	-2.59575	6.04503	0.00129277		ACX60_04895	cysT	-2.31063	4.961	0.00941304		ACX60_18950	ACX60_18950	2.04257	4.1198	0.000604671		ACX60_16285	cbpA	-2.04219	4.11869	2.93857e-05
ACX60_00285	ACX60_00285	-2.31287	4.96871	0.000516942		ACX60_12230	gst	-2.80761	7.00124	4.86185e-06		ACX60_04805	ACX60_04805	-1.89205	3.71163	0.00129277		ACX60_18370	ACX60_18370	-2.67285	6.37687	0.00963442		ACX60_10870	arsR	5.26324	38.4054	0.000638604		ACX60_12140	ACX60_12140	-2.04141	4.11648	0.000108701
ACX60_12315	tas	-1.70125	3.25183	0.000581396		ACX60_17155	ACX60_17155	-2.80368	6.98218	3.07459e-07		ACX60_08470	ACX60_08470	-1.59717	3.0255	0.00129758		ACX60_17720	dld	-1.76706	3.40359	0.00963442		ACX60_00185	ACX60_00185	2.14172	4.41289	0.00073486		ACX60_05475	ybdD	-2.03832	4.10766	0.0219554
ACX60_16645	ACX60_16645	-2.41892	5.3477	0.000604374		ACX60_02985	ilvE	-2.79906	6.95988	3.2305e-07		ACX60_17840	fkpA	-1.66803	3.1778	0.00133131		ACX60_18315	ACX60_18315	-2.92619	7.60101	0.00992962		ACX60_18140	guaD	1.81097	3.50879	0.00104152		ACX60_00270	yliI	-2.03516	4.09868	0.00111174
ACX60_04875	ACX60_04875	-2.37776	5.1973	0.000644083		ACX60_15675	gntT	-2.77746	6.85644	2.20762e-05		ACX60_00385	hutH	-1.51756	2.86305	0.00136176		ACX60_16940	pepA	-1.5077	2.84356	0.00992962		ACX60_03085	ACX60_03085	2.16228	4.47623	0.00113064		ACX60_07105	ACX60_07105	-2.02969	4.08316	0.0118527
ACX60_12755	choD	-1.87774	3.675	0.000644974		ACX60_15945	MA20_22020	-2.7708	6.82488	1.01689e-05		ACX60_04335	ydgI	-1.78488	3.44589	0.00136244		ACX60_15670	gntK	-1.67901	3.20209	0.0104584		ACX60_10850	ACX60_10850	4.66636	25.3931	0.00113777		ACX60_05325	ipdC	-2.02578	4.07212	0.0083464
ACX60_04550	ACX60_04550	-1.57257	2.97433	0.000644974		ACX60_09885	oppC	-2.75592	6.75485	3.29795e-05		ACX60_14640	ACX60_14640	-2.15367	4.44958	0.00136353		ACX60_14605	nuoE	-1.68656	3.21889	0.010569		ACX60_04895	cysT	2.5822	5.98854	0.00143477		ACX60_07055	aldA	-2.02513	4.07028	0.00152763
ACX60_07870	MA20_32330	-1.92849	3.80658	0.000665047		ACX60_03585	pfpI	-2.74894	6.72225	2.45158e-07		ACX60_05825	ybgI	-1.79604	3.47266	0.00142977		ACX60_12665	ACX60_12665	-2.08575	4.24497	0.010789		ACX60_01910	ACX60_01910	1.90294	3.73974	0.00145697		ACX60_10795	btuE	-2.02276	4.06361	9.49205e-05
ACX60_14355	otsA	-2.98966	7.94284	0.000667377		ACX60_02980	glnE	-2.7361	6.66266	1.23429e-07		ACX60_16255	gspG	-1.67714	3.19794	0.00149381		ACX60_05960	mrdB	-1.52723	2.88232	0.0108455		ACX60_11145	papP	3.1737	9.0236	0.00149895		ACX60_04875	ACX60_04875	-2.00654	4.01818	0.00296108
ACX60_07105	ACX60_07105	-2.98626	7.92417	0.000727901		ACX60_05945	ACX60_05945	-2.72365	6.60541	7.12305e-06		ACX60_02640	ACX60_02640	-1.77031	3.41128	0.00170862		ACX60_10890	ycaC	-1.91766	3.77809	0.0109053		ACX60_10695	ACX60_10695	2.36411	5.14834	0.00165999		ACX60_05790	ACX60_05790	-1.99802	3.99451	0.014211
ACX60_08645	cpo	-1.76733	3.40424	0.000790641		ACX60_16080	gst	-2.71133	6.54923	2.91164e-06		ACX60_10610	ACX60_10610	-2.21069	4.62896	0.00173291		ACX60_00345	fahA	-1.57632	2.98208	0.0111548		ACX60_00970	ACX60_00970	1.67317	3.18915	0.00173758		ACX60_11820	ACX60_11820	-1.99015	3.97278	2.20788e-05
ACX60_05360	ACX60_05360	-1.66914	3.18025	0.000807025		ACX60_18385	NA	-2.70966	6.54168	0.0112876		ACX60_15330	acnA	-1.6923	3.23172	0.00173874		ACX60_15800	lgt	-2.32085	4.99627	0.0111564		ACX60_17280	nepI	2.82384	7.08045	0.00180466		ACX60_10800	msrB	-1.98432	3.95677	0.000160042
ACX60_14350	otsB	-5.18622	36.409	0.000815235		ACX60_04340	ACX60_04340	-2.70207	6.50734	0.033799		ACX60_09455	moxR	-1.56574	2.96029	0.00176676		ACX60_01835	astB	-1.94894	3.86092	0.0118513		ACX60_06025	ACX60_06025	1.94869	3.86023	0.00195962		ACX60_00955	ACX60_00955	-1.98411	3.95617	0.000384382
ACX60_00525	ACX60_00525	-1.72265	3.30042	0.000845066		ACX60_01035	gabP	-2.69765	6.48744	0.0184854		ACX60_15160	yfcG	-1.55296	2.93419	0.00184032		ACX60_00925	msuE	-2.09965	4.28604	0.0119356		ACX60_07985	hslR	1.56846	2.96588	0.00212766		ACX60_09660	mtlD	-1.98208	3.95063	0.000177831
ACX60_02985	ilvE	-1.5481	2.92432	0.000848065		ACX60_07070	dhaT	-2.69586	6.47938	0.000304408		ACX60_03930	rpoD	-1.63535	3.10663	0.00186317		ACX60_11960	ACX60_11960	-1.85801	3.62508	0.012565		ACX60_11140	glnP7	2.71096	6.54756	0.00219859		ACX60_04455	ACX60_04455	-1.97761	3.9384	0.0186112
ACX60_02075	yjgR	-1.72187	3.29864	0.000941657		ACX60_03070	psiE	-2.69483	6.47478	0.00233197		ACX60_17585	ACX60_17585	-1.93528	3.82452	0.00191659		ACX60_14945	pabB	-1.78969	3.45741	0.0125905		ACX60_03765	ACX60_03765	3.50098	11.3214	0.00219859		ACX60_06385	bioA2	-1.97052	3.9191	0.00562488
ACX60_00280	yfdC	-3.43874	10.8433	0.000964783		ACX60_17725	lldD	-2.68774	6.44304	0.00422785		ACX60_07165	ybdG	-1.68357	3.21221	0.00192547		ACX60_02920	ACX60_02920	-1.92741	3.80371	0.0126171		ACX60_04900	ACX60_04900	2.66283	6.33274	0.00255258		ACX60_00865	ACX60_00865	-1.96059	3.89221	0.000625586
ACX60_14940	ACX60_14940	-1.74699	3.35657	0.000985662		ACX60_14250	ACX60_14250	-2.68613	6.43587	0.000111189		ACX60_04055	ACX60_04055	-1.7799	3.43401	0.00200972		ACX60_01945	aroE	-1.78457	3.44515	0.0127137		ACX60_17275	ACX60_17275	1.6501	3.13856	0.00272662		ACX60_09870	ACX60_09870	-1.9569	3.88226	0.011045
ACX60_09410	acoA	-4.64534	25.0257	0.00112461		ACX60_15665	gapN	-2.67594	6.39055	2.9037e-06		ACX60_04810	ACX60_04810	-1.65832	3.15649	0.00207507		ACX60_10280	gspJ	-2.08245	4.23526	0.0127955		ACX60_01475	sbp	2.58669	6.00717	0.00286909		ACX60_00525	ACX60_00525	-1.95664	3.88157	0.000296696
ACX60_11800	ybgK	-3.1613	8.94634	0.00115695		ACX60_04545	ACX60_04545	-2.67026	6.36544	3.18417e-06		ACX60_02340	rbn	-1.52195	2.87179	0.00221051		ACX60_03510	sanA	-1.85815	3.62542	0.0127955		ACX60_05205	ACX60_05205	2.37003	5.1695	0.00303058		ACX60_00285	ACX60_00285	-1.95546	3.87839	0.00277493
ACX60_09200	ACX60_09200	-2.04823	4.13598	0.00116623		ACX60_03400	yegP	-2.66995	6.36409	2.25897e-05		ACX60_07795	moaE	-1.62376	3.08177	0.00231122		ACX60_01005	ACX60_01005	-1.62527	3.08499	0.0127955		ACX60_17410	ACX60_17410	2.5428	5.82719	0.00345246		ACX60_13585	cjaB	-1.94371	3.84694	0.000881612
ACX60_09405	acoB	-4.8212	28.27	0.00123113		ACX60_06670	gcs2	-2.6494	6.27405	6.49499e-06		ACX60_04160	ACX60_04160	-1.60049	3.03247	0.00231122		ACX60_01360	acr1	-1.52574	2.87934	0.0130117		ACX60_01030	sinR	2.09644	4.27652	0.00402743		ACX60_05315	ACX60_05315	-1.94021	3.83761	0.00618797
ACX60_01345	ACX60_01345	-1.56994	2.96892	0.00126975		ACX60_11415	NA	-2.64608	6.25964	0.00519805		ACX60_12305	yhfA	-1.53747	2.90284	0.00232779		ACX60_10405	ACX60_10405	-2.05119	4.14448	0.0134201		ACX60_05460	kamA	1.59954	3.03047	0.00417095		ACX60_10685	gltI	-1.9371	3.82934	0.000296733
ACX60_05130	ACX60_05130	-1.6551	3.14945	0.00138654		ACX60_11235	ACX60_11235	-2.63604	6.21623	0.015593		ACX60_11150	yjdJ	-2.08866	4.25353	0.0025893		ACX60_14615	nuoB	-2.03185	4.0893	0.0135463		ACX60_01610	bfd	2.05848	4.16546	0.00509261		ACX60_06175	pepD	-1.93606	3.82659	0.00164141
ACX60_05945	ACX60_05945	-1.7104	3.27251	0.00152062		ACX60_05240	ACX60_05240	-2.62323	6.16126	0.000401229		ACX60_16525	alkB	-2.35568	5.11835	0.00261377		ACX60_02250		-1.95285	3.8714	0.0135526		ACX60_11745	hxlR	1.81777	3.52535	0.00536599		ACX60_04265	ACX60_04265	-1.93081	3.8127	0.00702262
ACX60_04810	ACX60_04810	-1.7118	3.2757	0.00173753		ACX60_01835	astB	-2.60376	6.07868	0.000803484		ACX60_16645	ACX60_16645	-2.05081	4.14339	0.00262552		ACX60_14395	birA	-1.68703	3.21994	0.0137227		ACX60_01810	mmuP	1.71472	3.28232	0.00538396		ACX60_08055	ACX60_08055	-1.92316	3.79253	7.80521e-05
ACX60_00560	yjiN	-1.57277	2.97476	0.00184266		ACX60_02075	yjgR	-2.60224	6.07228	3.88795e-06		ACX60_05055	blc	-1.6823	3.20939	0.00264023		ACX60_15425	holA	-1.84802	3.60005	0.0139738		ACX60_16010	ACX60_16010	1.52009	2.86808	0.00583294		ACX60_17545	paaF	-1.91996	3.78411	0.000246767
ACX60_10890	ycaC	-2.39449	5.2579	0.00184503		ACX60_03425	ACX60_03425	-2.58825	6.0137	0.0320555		ACX60_12290	clpB	-1.50589	2.83999	0.0027257		ACX60_17345	atpI	-1.92902	3.80796	0.0140459		ACX60_00925	msuE	2.19117	4.56677	0.00583294		ACX60_00725	ACX60_00725	-1.91731	3.77717	3.40731e-05
ACX60_14830	argJ	-1.67875	3.20149	0.00188643		ACX60_04550	ACX60_04550	-2.58641	6.00602	8.00185e-07		ACX60_14645	nrdA	-1.77932	3.43264	0.00273131		ACX60_05775	glnA	-1.50186	2.83208	0.0149881		ACX60_15410	ACX60_15410	1.63345	3.10253	0.00593493		ACX60_09250	atoB	-1.91447	3.76976	0.0014704
ACX60_16585	ACX60_16585	-1.91715	3.77675	0.00197485		ACX60_06385	bioA2	-2.58137	5.98509	0.00102809		ACX60_11300	yngG	-1.98675	3.96344	0.00275907		ACX60_14250	ACX60_14250	-1.6355	3.10695	0.0150056		ACX60_06380	ACX60_06380	1.79634	3.47337	0.00641195		ACX60_13555	mro	-1.91032	3.75892	0.00186787
ACX60_16330	ACX60_16330	-2.03633	4.102	0.00197895		ACX60_07820	ydeK	-2.57793	5.97081	0.0371216		ACX60_10680	gltJ	-1.90378	3.74191	0.00308753		ACX60_11285	mccB	-1.85899	3.62755	0.0156556		ACX60_00220	ACX60_00220	1.97425	3.92923	0.00745566		ACX60_13345	aceA	-1.90031	3.73292	0.000969502
ACX60_09850	yraR	-2.27046	4.82478	0.00206659		ACX60_03725	ACX60_03725	-2.57367	5.95322	7.67848e-07		ACX60_14530	ACX60_14530	-1.77536	3.42324	0.00310885		ACX60_11570	MA20_05250	-1.68711	3.22011	0.0157746		ACX60_08135	argD	1.67288	3.1885	0.00795713		ACX60_04185	ACX60_04185	-1.88311	3.6887	0.00286373
ACX60_11075	yfcF	-1.76324	3.39459	0.00209683		ACX60_00525	ACX60_00525	-2.57332	5.95179	4.16268e-06		ACX60_15945	MA20_22020	-1.63758	3.11143	0.00338919		ACX60_15910	ACX60_15910	-2.01518	4.04231	0.0167579		ACX60_17940	ssuA	2.80699	6.99822	0.00795713		ACX60_00935	ACX60_00935	-1.87357	3.66439	0.000645282
ACX60_09250	atoB	-1.93124	3.81383	0.00225955		ACX60_01840	astE	-2.57299	5.9504	0.0159797		ACX60_16900	pbpG	-1.61504	3.06321	0.00338919		ACX60_00400	hutG	-1.71721	3.288	0.0193269		ACX60_10865	arsB	4.0433	16.4874	0.00835891		ACX60_13835	ggt	-1.8659	3.64494	0.000940351
ACX60_00270	yliI	-1.90358	3.74139	0.00231864		ACX60_15655	ACX60_15655	-2.56243	5.90703	0.0001163		ACX60_06655	ACX60_06655	-2.14164	4.41263	0.00340953		ACX60_00340	maiA	-2.20475	4.60993	0.0193286		ACX60_18505	ACX60_18505	1.71891	3.29188	0.00920657		ACX60_11295	mccA	-1.86476	3.64208	0.0180629
ACX60_00955	ACX60_00955	-1.59222	3.01512	0.00235444		ACX60_04210	ACX60_04210	-2.56093	5.90087	1.7069e-07		ACX60_15720	clpP	-1.64603	3.1297	0.00348583		ACX60_16750	gspN	-1.85416	3.61541	0.0193286		ACX60_16535	pgsA	1.69278	3.23279	0.0114927		ACX60_05070	ACX60_05070	-1.84983	3.60457	0.00140951
ACX60_08295	aroF	-1.59925	3.02986	0.00240708		ACX60_11850	ACX60_11850	-2.55915	5.89358	3.31987e-06		ACX60_12325	ACX60_12325	-1.75059	3.36495	0.00354257		ACX60_05860	ahcY	-1.57592	2.98125	0.0193286		ACX60_17710	csiR_1	1.61094	3.05452	0.011925		ACX60_04055	ACX60_04055	-1.84759	3.59898	0.00138229
ACX60_11360	alr	-1.64497	3.1274	0.00244698		ACX60_13820	ACX60_13820	-2.54798	5.84813	1.31105e-06		ACX60_11220	ACX60_11220	-3.08765	8.50108	0.00360532		ACX60_14735	yxeP_1	-1.89595	3.72168	0.0197396		ACX60_16610	ACX60_16610	2.50202	5.66479	0.0132185		ACX60_08285	clpA	-1.8433	3.58829	0.000108701
ACX60_00395	hutI	-1.92281	3.79161	0.00264651		ACX60_01700	lifO	-2.54441	5.83369	0.00371977		ACX60_12055	cspV	-2.16472	4.4838	0.00377977		ACX60_07250	ydcO	-1.92982	3.81007	0.0202634		ACX60_13765	mmuM	1.81401	3.51618	0.0140013		ACX60_12285	cinA	-1.84203	3.58515	0.00180549
ACX60_11455	paaF	-6.82942	113.726	0.00267102		ACX60_14110	yeaW	-2.52453	5.75384	0.000230552		ACX60_10235	himD	-1.56469	2.95815	0.00400512		ACX60_02165	rpsH	-2.11566	4.33389	0.0202636		ACX60_13845	emrA	1.69462	3.23691	0.0142098		ACX60_00050	adeT	-1.84195	3.58494	0.0154548
ACX60_14470	ACX60_14470	-2.28716	4.88093	0.00282813		ACX60_14075	ACX60_14075	-2.51644	5.72168	0.00364921		ACX60_00790	ftsZ	-1.50886	2.84585	0.00400662		ACX60_17255	lysM	-1.72496	3.30571	0.0202636		ACX60_15845	ACX60_15845	1.55145	2.93111	0.0144616		ACX60_17285	ACX60_17285	-1.84032	3.5809	0.00156959
ACX60_03235	fadB	-1.66193	3.16441	0.00293022		ACX60_08295	aroF	-2.50923	5.69316	1.59091e-05		ACX60_14630	ACX60_14630	-2.09075	4.2597	0.00401978		ACX60_18455	NA	-2.34167	5.0689	0.0203294		ACX60_13490	atsA	1.78993	3.45798	0.017658		ACX60_17540	echA9	-1.83809	3.57535	0.0186054
ACX60_06415	ACX60_06415	-2.92484	7.59389	0.00293712		ACX60_18765	ACX60_18765	-2.50616	5.68104	6.35477e-05		ACX60_15020	gigB	-1.63736	3.11096	0.00410376		ACX60_11290	liuC	-1.89341	3.71512	0.0203661		ACX60_04205	dgkA	2.50503	5.67659	0.017658		ACX60_12325	ACX60_12325	-1.81637	3.52193	0.00275447
ACX60_14975	raiA	-1.60528	3.04254	0.00293878		ACX60_04165	kgtP_1	-2.5059	5.68005	2.12785e-07		ACX60_14355	otsA	-2.383	5.21621	0.00412395		ACX60_15495	ACX60_15495	-1.70374	3.25745	0.0205125		ACX60_06015	mexF	2.05799	4.16406	0.0193205		ACX60_11850	ACX60_11850	-1.78988	3.45786	0.000450415
ACX60_16080	gst	-1.50379	2.83587	0.00310775		ACX60_05025	ACX60_05025	-2.50421	5.67337	2.34934e-06		ACX60_12310	crp	-2.00097	4.0027	0.00424052		ACX60_02100	rplD	-2.15147	4.4428	0.0213678		ACX60_11375	azoR	1.69869	3.24606	0.0211417		ACX60_07780	ACX60_07780	-1.78776	3.45279	0.00890065
ACX60_17705	prpB	-1.87041	3.65637	0.00320859		ACX60_12375	ACX60_12375	-2.49602	5.64126	0.0159797		ACX60_11475	paaB	-1.94301	3.84507	0.00433556		ACX60_12295	ACX60_12295	-1.64202	3.12103	0.0217548		ACX60_12280	ACX60_12280	1.52262	2.87311	0.0251953		ACX60_07115	ACX60_07115	-1.7834	3.44236	0.00198165
ACX60_18760	ACX60_18760	-1.58969	3.00985	0.00320859		ACX60_07645	ACX60_07645	-2.47025	5.54141	0.000684484		ACX60_08170	ACX60_08170	-1.66425	3.16948	0.00454438		ACX60_11680	evpA	-1.98663	3.96311	0.0222713		ACX60_00985	mecR	2.14945	4.43658	0.0252033		ACX60_07220	ACX60_07220	-1.7829	3.44116	0.00186176
ACX60_16905	uvrY	-1.87535	3.66891	0.00351728		ACX60_03705	prpF	-2.46144	5.50766	5.00156e-07		ACX60_01975	ACX60_01975	-2.19536	4.58003	0.00471767		ACX60_16455	pilC	-1.79512	3.47044	0.0250592		ACX60_10875	arsC	3.62621	12.3481	0.0252033		ACX60_08355	ycaP	-1.77397	3.41993	0.0184606
ACX60_06670	gcs2	-1.55298	2.93422	0.00354758		ACX60_12805	fcs	-2.43911	5.42306	0.000502496		ACX60_17595	dadA	-1.55559	2.93955	0.00498732		ACX60_11260	ropAch1	-2.17585	4.51852	0.025106		ACX60_06090	gspE	1.73252	3.32307	0.0279922		ACX60_06820	ACX60_06820	-1.77112	3.41319	0.0392434
ACX60_07795	moaE	-1.50853	2.84519	0.0036478		ACX60_18435	NA	-2.43427	5.40492	0.000952421		ACX60_15420	lptE	-1.54167	2.91131	0.00514884		ACX60_14690	xkdA	-1.73835	3.33654	0.0255574		ACX60_06310	ACX60_06310	1.82764	3.54955	0.0313629		ACX60_02980	glnE	-1.7633	3.39474	0.000148413
ACX60_11315	ACX60_11315	-2.66177	6.32811	0.00381595		ACX60_14975	raiA	-2.42747	5.37948	2.11377e-05		ACX60_12085	ACX60_12085	-2.13309	4.38655	0.00532585		ACX60_03315	rsmC	-1.72713	3.31069	0.0259434		ACX60_04890	cysW	2.32459	5.00922	0.0323425		ACX60_05295	ACX60_05295	-1.76132	3.39007	0.0490358
ACX60_06410	ACX60_06410	-3.55106	11.7213	0.0038675		ACX60_06545	pqiA	-2.42256	5.36121	0.0133763		ACX60_05790	ACX60_05790	-2.26723	4.81399	0.00562621		ACX60_04490	ACX60_04490	-1.99589	3.98862	0.0268209		ACX60_04445	MA20_05865	2.54411	5.83248	0.0325251		ACX60_10495	yceI	-1.74837	3.35978	0.000478107
ACX60_09420	ACX60_09420	-2.11419	4.32946	0.0042368		ACX60_18990	ACX60_18990	-2.42061	5.35398	9.7511e-05		ACX60_01715	ACX60_01715	-2.14843	4.43346	0.00603278		ACX60_18380	ACX60_18380	-3.45598	10.9737	0.0271202		ACX60_17950	ssuC	2.45639	5.48841	0.0433812		ACX60_04545	ACX60_04545	-1.74697	3.35653	0.00101672
ACX60_11260	ropAch1	-2.81109	7.01815	0.00439522		ACX60_17195	ACX60_17195	-2.40864	5.30975	0.00406361		ACX60_17845	fkpB	-1.63296	3.10149	0.00618542		ACX60_17260	dprA	-2.07364	4.20946	0.0271202		ACX60_01930	ACX60_01930	1.78467	3.4454	0.0467897		ACX60_13940	olsB	-1.74245	3.34604	0.0128931
ACX60_03385	MA20_15105	-1.85708	3.62275	0.00439522		ACX60_08755	NA	-2.40792	5.3071	0.0018524		ACX60_10890	ycaC	-2.00596	4.01656	0.00706592		ACX60_17890	desT	-1.68827	3.22269	0.0271202		ACX60_09325	yidP	2.27012	4.82364	0.0467897		ACX60_01800	ACX60_01800	-1.7411	3.3429	0.000162903
ACX60_00925	msuE	-2.33734	5.05368	0.00475966		ACX60_18205	ACX60_18205	-2.39767	5.26952	5.2025e-06		ACX60_05325	ipdC	-1.99067	3.97421	0.00715356		ACX60_02255	ACX60_02255	-2.20141	4.59927	0.0271703		ACX60_01020	ACX60_01020	4.37264	20.7155	0.048857		ACX60_10645	ACX60_10645	-1.72933	3.31574	0.00256796
ACX60_04245	ACX60_04245	-1.80235	3.48788	0.00510025		ACX60_06500	csuD	-2.39346	5.25417	0.000329461		ACX60_01950	hemF	-1.85864	3.62666	0.00735445		ACX60_15290	pntAA	-1.69755	3.24349	0.0272434		ACX60_10640	ACX60_10640	1.6471	3.13203	0.0491358		ACX60_05725	xdhB	-1.72879	3.31449	0.0393199
ACX60_09585	ACX60_09585	-2.58873	6.01571	0.00520454		ACX60_06830	acs-2	-2.39292	5.25219	0.0274858		ACX60_05820	sodB	-1.61	3.05252	0.00932184		ACX60_13875	ACX60_13875	-2.53215	5.78435	0.0279857								ACX60_04390	cycA	-1.71819	3.29024	3.9438e-05
ACX60_00400	hutG	-2.04611	4.12991	0.00531473		ACX60_15690	ackA	-2.39005	5.24175	1.53776e-05		ACX60_03160	trpA	-1.58608	3.00232	0.00956537		ACX60_11375	azoR	-1.67981	3.20386	0.0279857								ACX60_07065	ACX60_07065	-1.70396	3.25794	0.000603395
ACX60_17735	lldP	-2.88831	7.40403	0.00531872		ACX60_05770	dtpT	-2.38751	5.23253	2.06329e-07		ACX60_10835	ACX60_10835	-1.53748	2.90287	0.0097507		ACX60_04285	ACX60_04285	-3.78755	13.8092	0.0286264								ACX60_14385	ACX60_14385	-1.70393	3.25786	0.0186054
ACX60_09400	acoC	-2.11694	4.33774	0.00534347		ACX60_18750	tniB	-2.38031	5.20647	1.25298e-05		ACX60_06170	ACX60_06170	-1.68558	3.21669	0.00994604		ACX60_07730	accB	-2.28665	4.87921	0.0287996								ACX60_16310	ACX60_16310	-1.70063	3.25043	0.045592
ACX60_05720	xdhA	-2.06616	4.1877	0.00534347		ACX60_06380	ACX60_06380	-2.37566	5.18972	0.000320225		ACX60_06415	ACX60_06415	-2.49601	5.64123	0.010528		ACX60_05405	ACX60_05405	-2.02124	4.05932	0.0303805								ACX60_13450	ybbA	-1.69996	3.24891	0.00889608
ACX60_00050	adeT	-2.16301	4.47849	0.00535041		ACX60_18590	ACX60_18590	-2.37294	5.17995	0.000445794		ACX60_10675	gltK	-1.90534	3.74597	0.0109551		ACX60_12955	ACX60_12955	-1.74198	3.34493	0.0307511								ACX60_03180	ACX60_03180	-1.69776	3.24397	0.0215495
ACX60_01430	ACX60_01430	-1.91614	3.77411	0.00552354		ACX60_05195	ACX60_05195	-2.36531	5.15262	0.000172408		ACX60_17720	dld	-1.64679	3.13135	0.0111681		ACX60_11410	secC	-2.33592	5.04872	0.0328423								ACX60_14730	ACX60_14730	-1.69683	3.24187	0.00027608
ACX60_02460	ACX60_02460	-1.96225	3.89669	0.00565219		ACX60_17695	acnD	-2.36439	5.14936	0.00489914		ACX60_06055	yfhL	-1.93683	3.82865	0.0117588		ACX60_05800	ACX60_04285	-3.72922	13.2619	0.0332996								ACX60_14905	nudL	-1.69564	3.23921	0.000121343
ACX60_06820	ACX60_06820	-3.23347	9.40528	0.00565399		ACX60_09580	ybhF	-2.3626	5.14296	4.6543e-05		ACX60_06920	acnB	-1.88332	3.68922	0.0118495		ACX60_02190	rplO	-1.55391	2.93612	0.0343782								ACX60_08645	cpo	-1.69381	3.2351	0.00132428
ACX60_17570	ACX60_17570	-1.89035	3.70725	0.00597944		ACX60_11865	ACX60_11865	-2.35756	5.12503	0.0047405		ACX60_11795	bccA	-1.74701	3.35661	0.0129519		ACX60_07020	lpxH	-1.82666	3.54716	0.0357455								ACX60_06580	sndH	-1.69108	3.22898	0.00027608
ACX60_12900	astA	-3.54204	11.6482	0.0070034		ACX60_07220	ACX60_07220	-2.35739	5.12442	6.29268e-05		ACX60_16530	ada	-2.2875	4.8821	0.0130609		ACX60_00600	ACX60_00600	-5.62723	49.4271	0.0371216								ACX60_06995	miaA	-1.68678	3.21937	0.0106454
ACX60_04265	ACX60_04265	-1.85475	3.61688	0.00717811		ACX60_01820	argD	-2.34759	5.08972	0.000109842		ACX60_11435	paaK	-1.52759	2.88305	0.0155235		ACX60_00670	ACX60_00670	-1.57682	2.98312	0.0385749								ACX60_16335	pap	-1.68539	3.21627	3.13453e-05
ACX60_17540	echA9	-2.40331	5.29016	0.00721967		ACX60_04035	ACX60_04035	-2.34678	5.08686	0.000403246		ACX60_07960	fabZ	-1.69246	3.23208	0.0165403		ACX60_16760	fcbC	-2.19158	4.56804	0.0390758								ACX60_05330	aroP	-1.68186	3.20842	0.0330168
ACX60_09720	ACX60_09720	-1.96916	3.91541	0.00786491		ACX60_09895	prlC	-2.3431	5.07393	5.01537e-07		ACX60_03165	accD	-1.55732	2.94307	0.0177827		ACX60_14575	nuoK	-2.01974	4.0551	0.0390758								ACX60_02260	ACX60_02260	-1.67903	3.20213	0.000645282
ACX60_12060	ACX60_12060	-3.06133	8.34743	0.00855228		ACX60_01715	ACX60_01715	-2.33001	5.02809	0.0021748		ACX60_11570	MA20_05250	-1.58385	2.99769	0.0180254		ACX60_15620	ndk	-1.81542	3.51961	0.04077								ACX60_03680	ACX60_03680	-1.67633	3.19615	0.0220716
ACX60_12905	argD	-1.88781	3.70074	0.00933756		ACX60_14940	ACX60_14940	-2.32571	5.01313	3.94611e-05		ACX60_05090	cicA	-1.83016	3.55575	0.0180553		ACX60_10710	metQ3	-3.30918	9.912	0.0410643								ACX60_02500	atuF	-1.67299	3.18874	0.0490905
ACX60_06570	ygeA	-1.78502	3.44623	0.0096839		ACX60_00255	ACX60_00255	-2.32556	5.01261	1.38003e-06		ACX60_15715	clpX	-1.50364	2.83557	0.0184805		ACX60_00320	ybbK	-2.05548	4.15682	0.0419906								ACX60_01925	pspC	-1.67277	3.18826	0.000806459
ACX60_16005	ACX60_16005	-2.41831	5.34546	0.00998504		ACX60_11205	katE	-2.31666	4.98179	2.79512e-05		ACX60_11210	ACX60_11210	-1.54906	2.92626	0.0232676		ACX60_05920	tsf	-1.63062	3.09647	0.0424148								ACX60_11935	uspA	-1.66366	3.16818	0.000330119
ACX60_17695	acnD	-2.23529	4.70859	0.0102614		ACX60_04810	ACX60_04810	-2.3165	4.98123	3.94031e-05		ACX60_07320	ACX60_07320	-1.55443	2.93718	0.0268901		ACX60_08435	ACX60_08435	-1.52965	2.88715	0.0456438								ACX60_14270	ygaU	-1.6633	3.16739	0.00588171
ACX60_09245	atoE	-1.5891	3.00861	0.0104174		ACX60_18420	icmE	-2.31114	4.96274	0.00055941		ACX60_05315	ACX60_05315	-1.51149	2.85104	0.0275447		ACX60_06060	yegQ	-1.65345	3.14585	0.0465151								ACX60_14935	ACX60_14935	-1.65694	3.15347	0.0349106
ACX60_11425	paaY	-1.79497	3.47008	0.0106461		ACX60_15155	yqaA	-2.31049	4.96053	0.0422666		ACX60_09480	ACX60_09480	-1.82195	3.53558	0.0301535		ACX60_02720	ACX60_02720	-2.15624	4.4575	0.0489052								ACX60_08265	ACX60_08265	-1.65279	3.14442	0.00032985
ACX60_08940	ACX60_08940	-2.01696	4.0473	0.0109328		ACX60_12970	metQ_4	-2.29314	4.9012	1.88793e-06		ACX60_07105	ACX60_07105	-1.6483	3.13463	0.0327779		ACX60_06475	ACX60_06475	-1.95694	3.88236	0.0500479								ACX60_08545	ACX60_08545	-1.65156	3.14173	0.00901123
ACX60_15375	ACX60_15375	-3.5463	11.6827	0.0116245		ACX60_13360	citN	-2.29236	4.89857	9.1819e-07		ACX60_04045	ACX60_04045	-1.6868	3.21943	0.0333486		ACX60_02765	ACX60_02765	11.1523	2276.01	9.84038e-15								ACX60_01590	ACX60_01590	-1.65076	3.13998	0.00406875
ACX60_09395	lpdA	-1.72299	3.30119	0.0117695		ACX60_11275	ACX60_11275	-2.28912	4.88758	0.000920689		ACX60_15095	trxA	-1.61251	3.05783	0.0353121		ACX60_02745	copC	12.8113	7187.67	9.84038e-15								ACX60_04415	xerC	-1.64245	3.12196	0.00348775
ACX60_08675	ACX60_08675	-2.53845	5.80963	0.0118314		ACX60_03740	ACX60_03740	-2.28786	4.88332	0.0326008		ACX60_13405	rubA	-1.74086	3.34234	0.040148		ACX60_02740	copD	9.25132	609.43	1.9727e-13								ACX60_07810	ACX60_07810	-1.64084	3.11847	0.0199621
ACX60_05105	yrpB	-1.98632	3.96225	0.0125953		ACX60_14440	ACX60_14440	-2.28273	4.86598	2.9037e-06		ACX60_08225		1.50202	2.83239	0.00261377		ACX60_02770	ACX60_02770	8.00966	257.72	4.73066e-13								ACX60_00110	metP	-1.63533	3.10659	0.00736125
ACX60_12805	fcs	-1.64823	3.13449	0.0125953		ACX60_15860	calB	-2.27745	4.84822	2.9474e-07		ACX60_06780	yvbT	4.19232	18.2816	2.41111e-08		ACX60_09705	ACX60_09705	6.04807	66.1683	1.17262e-11								ACX60_11275	ACX60_11275	-1.63408	3.10389	0.0174075
ACX60_00335	ACX60_00335	-2.39441	5.25761	0.0136025		ACX60_17635	ACX60_17635	-2.2733	4.83429	7.46996e-06		ACX60_06020	mexE	6.70005	103.972	1.09511e-07		ACX60_12140	ACX60_12140	5.33651	40.4064	2.18834e-11								ACX60_14435	ACX60_14435	-1.63281	3.10117	7.70277e-05
ACX60_09285	kgtP	-3.40708	10.608	0.0136189		ACX60_17580	cycA	-2.27281	4.83263	0.0130392		ACX60_07240	mgtA	6.0878	68.0158	6.68287e-07		ACX60_02775	copB	7.37334	165.805	2.83019e-11								ACX60_14030	ACX60_14030	-1.63235	3.10018	0.0285414
ACX60_07120	ACX60_07120	-4.11037	17.272	0.0143549		ACX60_07505	ACX60_07505	-2.26566	4.80874	0.0187086		ACX60_17935	ssuA	4.42366	21.4613	1.6593e-06		ACX60_09715	iucD	7.16711	143.72	7.05304e-11								ACX60_05055	blc	-1.63095	3.09717	0.00392451
ACX60_09415	lipA	-1.74908	3.36143	0.0144725		ACX60_14745	ACX60_14745	-2.24886	4.75307	0.0290833		ACX60_10845	ahpF	3.75813	13.5303	2.42509e-06		ACX60_10570	ACX60_10570	10.7596	1733.69	7.05304e-11								ACX60_14790	gcdR	-1.62889	3.09275	0.0156556
ACX60_14735	yxeP_1	-1.94656	3.85454	0.0148315		ACX60_12755	choD	-2.24866	4.75241	6.69445e-05		A1S_3471	A1S_3471	7.02653	130.375	2.42509e-06		ACX60_05645	entB	6.13829	70.4385	1.10842e-10								ACX60_01850	ACX60_01850	-1.62698	3.08866	0.00209196
ACX60_17535	ACX60_17535	-2.14681	4.42847	0.0155596		ACX60_16360	ACX60_16360	-2.24604	4.74378	3.50779e-05		A1S_3469	VY92_07350	8.04508	264.125	2.42509e-06		ACX60_09665	iucB	6.46574	88.3857	1.15979e-10								ACX60_10885	nfdA	-1.62308	3.08033	0.0018712
ACX60_10695	ACX60_10695	-1.78859	3.45478	0.0155596		ACX60_10890	ycaC	-2.24571	4.74272	0.00208037		A1S_3475	irp	8.1778	289.576	2.42509e-06		ACX60_09600	ACX60_09600	4.38038	20.8269	1.15981e-10								ACX60_16785	algR	-1.61653	3.06637	0.000250671
ACX60_02490	atuD	-1.8358	3.5697	0.0160025		ACX60_11820	MA20_16490	-2.2391	4.72103	1.83509e-06		A1S_3467	A1S_3467	8.70434	417.125	2.42509e-06		ACX60_02760	ACX60_02760	5.27368	38.6845	1.15981e-10								ACX60_05360	ACX60_05360	-1.59942	3.03021	0.00137363
ACX60_00260	ACX60_00260	-2.26417	4.80378	0.0161838		ACX60_18775	NA	-2.23779	4.71675	0.000724135		A1S_3472	A1S_3472	7.39551	168.373	3.29634e-06		ACX60_05635	ACX60_05635	6.62379	98.6188	2.48294e-10								ACX60_03235	fadB	-1.59925	3.02985	0.0038171
ACX60_18305	ACX60_18305	-1.51497	2.85792	0.0161934		ACX60_01830	astD	-2.22699	4.68157	3.3568e-05		A1S_3466	A1S_3466	10.861	1859.88	3.29634e-06		ACX60_09720	ACX60_09720	7.50299	181.394	4.67145e-10								ACX60_07060	ACX60_07060	-1.59767	3.02654	0.00162517
ACX60_16595	ACX60_16595	-3.96507	15.6173	0.0162408		ACX60_11315	ACX60_11315	-2.22599	4.67833	0.0102763		ACX60_18675	trbL	8.61445	391.929	3.59866e-06		ACX60_03750	eptA	4.5097	22.7801	8.6228e-10								ACX60_11300	yngG	-1.59145	3.01353	0.0114418
ACX60_18155	ACX60_18155	-3.09332	8.53459	0.0164739		ACX60_14915	ACX60_14915	-2.22223	4.66616	6.49499e-06		A1S_3470	traJ	8.55407	375.865	3.65092e-06		ACX60_05590	bauF	5.83228	56.9761	8.93259e-10								ACX60_05770	dtpT	-1.58868	3.00774	0.000140586
ACX60_07110	papD	-1.85287	3.61217	0.0172795		ACX60_14020	ate	-2.21876	4.65492	2.8784e-06		A1S_3463	lysA	11.6505	3214.87	5.53605e-06		ACX60_02750	pacS	3.47429	11.1138	9.54171e-10								ACX60_17710	csiR_1	-1.58787	3.00606	0.0131655
ACX60_11275	ACX60_11275	-1.64549	3.12855	0.0178875		ACX60_17405	ACX60_17405	-2.21711	4.6496	2.27471e-06		A1S_3461	A1S_3461	5.99324	63.701	5.95542e-06		ACX60_09700	asbA	5.42491	42.9598	9.89345e-10								ACX60_06960	ACX60_06960	-1.58697	3.00419	0.0188816
ACX60_11420	ACX60_11420	-2.80563	6.99166	0.0183942		ACX60_00345	fahA	-2.21609	4.64632	0.000348855		A1S_3465	A1S_3465	9.59352	772.569	5.95542e-06		ACX60_05680	entC	5.64892	50.176	9.89345e-10								ACX60_14940	ACX60_14940	-1.56956	2.96813	0.00269186
ACX60_14660	ACX60_14660	-2.52947	5.77358	0.0183942		ACX60_14705	metE	-2.21513	4.64324	6.01242e-05		ACX60_15960	gltT	2.3327	5.03747	6.06718e-06		ACX60_04270	dhbF	5.39213	41.9946	2.4078e-09								ACX60_07800	moaC	-1.56615	2.96113	0.00438279
ACX60_16620	ACX60_16620	-1.64592	3.12947	0.0183942		ACX60_09940	glcB	-2.20923	4.62428	1.97654e-05		ACX60_12220	ahpF	3.30259	9.86686	6.94319e-06		ACX60_04450	ACX60_04450	7.34401	162.468	3.02843e-09								ACX60_15695	pta	-1.56012	2.94878	0.00253459
ACX60_10610	ACX60_10610	-1.59818	3.02761	0.0184687		ACX60_01775	ACX60_01775	-2.20655	4.61571	1.74772e-05		ACX60_13225	ACX60_13225	3.51422	11.4258	6.94319e-06		ACX60_04660	entC	5.80318	55.8382	3.34484e-09								ACX60_00950	actP	-1.5582	2.94485	0.0220409
ACX60_06825	mmgC	-1.6789	3.20183	0.0185347		ACX60_08760	NA	-2.19903	4.5917	0.0070966		A1S_3474	A1S_3474	6.12974	70.0224	6.94319e-06		ACX60_05600	ACX60_05600	6.00149	64.0662	3.34484e-09								ACX60_08470	ACX60_08470	-1.55598	2.94033	0.00140951
ACX60_00340	maiA	-2.13588	4.39506	0.0189145		ACX60_18415	ACX60_18415	-2.19353	4.57422	0.00585544		A1S_3462	lysR	11.0685	2147.63	8.73094e-06		ACX60_04725	basH	4.15217	17.7799	3.94531e-09								ACX60_09385	bdhA	-1.55581	2.93999	0.001069
ACX60_09575	ybhS	-2.00501	4.01391	0.0189859		ACX60_09235	scoA	-2.1836	4.54287	0.000225668		A1S_3464	A1S_3464	9.24082	605.011	8.81073e-06		ACX60_08390	pcaD	5.73772	53.3613	4.03859e-09								ACX60_05045	ycdB	-1.54834	2.9248	0.000348592
ACX60_08100	ACX60_08100	-1.53528	2.89845	0.01942		ACX60_05420	ACX60_05420	-2.18201	4.53785	0.000172408		ACX60_18075	ACX60_18075	4.4742	22.2264	1.04109e-05		ACX60_05630	iucD	5.11315	34.6107	4.6979e-09								ACX60_10670	gltL	-1.5479	2.92391	0.0318034
ACX60_14120	yeaV	-3.57839	11.9454	0.0200751		ACX60_06060	yegQ	-2.18122	4.53536	0.00586576		ACX60_14460	mtnN	3.64971	12.5509	1.13663e-05		ACX60_10745	ACX60_10745	6.14738	70.8835	6.9837e-09								ACX60_01780	parA	-1.53535	2.89859	0.00197199
ACX60_16910	kinA	-1.80782	3.50112	0.0202208		ACX60_18985	ACX60_18985	-2.17564	4.51787	0.000401276		A1S_3476	A1S_3476	11.5422	2982.35	1.29681e-05		ACX60_06110	hemP	5.87417	58.6546	1.04139e-08								ACX60_11470	paaC	-1.53465	2.89717	0.0489683
ACX60_06085	ACX60_06085	-2.70427	6.51729	0.0202684		ACX60_18960	ACX60_18960	-2.17324	4.51034	1.98449e-05		A1S_3468	A1S_3468	8.84734	460.59	1.61274e-05		ACX60_05640	entE	7.26689	154.011	1.04733e-08								ACX60_17995	ACX60_17995	-1.52609	2.88004	0.00203648
ACX60_04310	ACX60_04310	-3.96804	15.6495	0.0207251		ACX60_06540	yxxF	-2.16836	4.49512	0.000698302		ACX60_05905	ompW	4.48909	22.457	1.6503e-05		ACX60_01610	bfd	5.405	42.3707	1.06313e-08								ACX60_09850	yraR	-1.52344	2.87475	0.0253486
ACX60_10790	msmR	-1.90527	3.74579	0.0208175		ACX60_17540	echA9	-2.16287	4.47806	0.0114784		ACX60_06015	mexF	4.03489	16.3917	1.72812e-05		ACX60_14855	ACX60_14855	4.66766	25.4159	1.06971e-08								ACX60_17880	desA3	-1.52324	2.87435	0.0184606
ACX60_06405	ACX60_06405	-4.08582	16.9806	0.021637		ACX60_14070	ACX60_14070	-2.16184	4.47486	0.0485957		ACX60_14785	gcdH	1.85191	3.60978	2.04191e-05		ACX60_02755	ACX60_02755	4.51897	22.9268	1.79561e-08								ACX60_16905	uvrY	-1.50991	2.84792	0.0178904
ACX60_03680	ACX60_03680	-1.55265	2.93356	0.0228774		ACX60_00405	ACX60_00405	-2.15958	4.46786	0.0007659		ACX60_13160	czcD1	4.15841	17.8569	2.57187e-05		ACX60_12145	copZ	6.90988	120.249	1.80422e-08								ACX60_03690	hchA	-1.50982	2.84775	0.0185726
ACX60_02255	ACX60_02255	-2.1493	4.43613	0.0232408		ACX60_00695	hpf	-2.15697	4.45978	0.000663185		ACX60_00880	xenB	3.14699	8.85809	2.67296e-05		ACX60_09710	emrB	5.90831	60.0589	1.9197e-08								ACX60_11270	acsf	-1.50948	2.84708	0.0409956
ACX60_01035	gabP	-2.61049	6.1071	0.0235456		ACX60_04040	ACX60_04040	-2.15354	4.44918	0.000164423		ACX60_17940	ssuA	4.71613	26.2844	3.10845e-05		ACX60_11365	pobA	5.40491	42.3683	4.1863e-08								ACX60_08855	ACX60_08855	1.50198	2.83232	0.00255069
ACX60_02325	ycgM	-1.89953	3.7309	0.0246902		ACX60_06820	ACX60_06820	-2.15131	4.44232	0.0395578		ACX60_01085	ACX60_01085	3.51851	11.4598	3.25478e-05		ACX60_09610	ACX60_09610	4.01793	16.2001	4.97064e-08								ACX60_01005	ACX60_01005	1.50613	2.84047	0.0179965
ACX60_05515	slsA	-1.5864	3.003	0.0255995		ACX60_04160	ACX60_04160	-2.14322	4.41746	7.73157e-05		ACX60_10570	ACX60_10570	3.8893	14.8182	4.46173e-05		ACX60_05615	yclP	5.14837	35.4662	9.99228e-08								ACX60_17850	murJ	1.50954	2.8472	0.00705158
ACX60_09710	emrB	-2.0764	4.21752	0.0256281		ACX60_14435	ACX60_14435	-2.13737	4.39958	6.34908e-07		ACX60_04270	dhbF	2.73918	6.67689	5.09383e-05		ACX60_07850	fumC	2.18487	4.54686	1.71625e-07								ACX60_18965	ACX60_18965	1.50955	2.84721	0.00219132
ACX60_06830	acs-2	-2.30283	4.93424	0.0273086		ACX60_09220	ACX60_09220	-2.13551	4.39391	0.00304927		ACX60_03510	sanA	2.81073	7.01639	5.73218e-05		ACX60_18045	ACX60_18045	3.70057	13.0012	2.2311e-07								ACX60_02145	rplN	1.51855	2.86503	0.012286
ACX60_12050	ACX60_12050	-2.54142	5.82163	0.0276562		ACX60_14730	ACX60_14730	-2.13334	4.38732	6.93619e-06		ACX60_15730	ACX60_15730	2.03316	4.09301	6.0821e-05		ACX60_08055	ACX60_08055	2.68337	6.42357	2.64649e-07								ACX60_17305	atpC	1.52076	2.86942	0.0259327
ACX60_02485	accD2	-1.94918	3.86156	0.0276562		ACX60_14355	otsA	-2.13285	4.38583	0.00618635		ACX60_16820	ACX60_16820	2.84182	7.16923	6.32209e-05		ACX60_05660	pchH	4.29179	19.5866	2.6477e-07								ACX60_03545	yaaJ	1.52383	2.87554	0.00462903
ACX60_07095	ACX60_07095	-3.23872	9.43958	0.0293632		ACX60_01890	ACX60_01890	-2.12749	4.36957	0.000342164		ACX60_18725	ACX60_18725	7.20772	147.823	6.32209e-05		ACX60_05595	basA	4.2094	18.4993	3.41854e-07								ACX60_08970	ACX60_08970	1.53017	2.8882	0.00755148
ACX60_00425	ACX60_00425	-2.01496	4.04169	0.0293632		ACX60_11105	srpI	-2.12536	4.36313	0.0365392		ACX60_09280	ACX60_09280	1.98638	3.96243	6.76522e-05		ACX60_06790	ACX60_06790	2.82478	7.08508	3.45894e-07								ACX60_14230	ctc	1.53021	2.88828	0.00716278
ACX60_13875	ACX60_13875	-2.39655	5.26544	0.0305417		ACX60_18255	ACX60_18255	-2.12117	4.35048	9.36479e-05		ACX60_12240	trmB	2.35416	5.11297	6.76856e-05		ACX60_08395	pcaK	5.48558	44.8048	4.26287e-07								ACX60_02155	rplE	1.53035	2.88856	0.0204284
ACX60_08525	hcaA2	-4.87789	29.403	0.0324867		ACX60_00280	yfdC	-2.12116	4.35042	0.0168236		ACX60_08550	tynA	2.86456	7.28312	7.2801e-05		ACX60_08420	quiC	4.7749	27.3771	7.61614e-07								ACX60_04475	serC	1.53757	2.90305	0.0142539
ACX60_18375	ACX60_18375	-1.51917	2.86627	0.0342231		ACX60_04175	glpD	-2.11234	4.32392	2.46663e-05		ACX60_07245	mgtC	2.86328	7.27667	9.20367e-05		ACX60_08400	pcaC	5.8515	57.7402	7.61614e-07								ACX60_02905	yajC	1.54033	2.90862	0.00471929
ACX60_00325	hppD	-1.71145	3.2749	0.0351277		ACX60_18240	NA	-2.10712	4.3083	0.00615473		ACX60_18445	ACX60_18445	2.76922	6.81737	9.24665e-05		ACX60_15845	tonB	3.22419	9.34498	2.05729e-06								ACX60_01710	ACX60_01710	1.54158	2.91114	0.0013811
ACX60_07805	moeA	-2.70341	6.51339	0.0372291		ACX60_16640	ACX60_16640	-2.09838	4.28229	0.00993761		ACX60_17415	yqjI	3.33467	10.0887	0.00011139		ACX60_08380	pcaF	6.21383	74.2248	2.43217e-06								ACX60_12670	cybB	1.54331	2.91463	0.00460031
ACX60_17725	lldD	-1.94017	3.83752	0.0375909		ACX60_13935	yafJ	-2.09635	4.27626	0.000113853		ACX60_05895	yhjX_2	3.29882	9.84113	0.000123756		ACX60_13715	ACX60_13715	4.60817	24.3891	2.47111e-06								ACX60_04880	cbl	1.54356	2.91512	0.00247845
ACX60_11010	mdcD	-1.60752	3.04727	0.0392767		ACX60_09500	ACX60_09500	-2.09489	4.27195	0.000219001		ACX60_03765	ACX60_03765	4.40426	21.1745	0.000128466		ACX60_05670	basH	3.50228	11.3316	2.57124e-06								ACX60_15140	rplT	1.54774	2.92359	0.0473646
ACX60_12795	hcaA	-3.52812	11.5364	0.0408272		ACX60_14660	ACX60_14660	-2.09337	4.26742	0.0398119		A1S_3473	A1S_3473	3.78161	13.7524	0.000129475		ACX60_00830	ACX60_00830	2.45548	5.48495	2.5726e-06								ACX60_03975	sdhA	1.55023	2.92864	0.00197199
ACX60_08815	ACX60_08815	-2.9584	7.77262	0.0419952		ACX60_03735	plsC2	-2.08726	4.24939	0.0297897		ACX60_04635	purL	1.94058	3.8386	0.00014915		ACX60_15730	ACX60_15730	2.43011	5.38935	4.55831e-06								ACX60_00070	tyrS	1.55455	2.93742	0.00200105
ACX60_16250	ACX60_16250	-1.63157	3.09849	0.0420494		ACX60_09585	ACX60_09585	-2.0826	4.23571	0.0151206		ACX60_01875	ydfC	3.99237	15.9156	0.00015072		ACX60_04720	basI	2.92169	7.57733	4.58033e-06								ACX60_16630	yuiF	1.55499	2.93832	0.041951
ACX60_11225	ACX60_11225	-3.22252	9.33414	0.0430943		ACX60_09060	ttr	-2.07678	4.21864	0.0402795		ACX60_07405	ACX60_07405	4.50328	22.679	0.000173166		ACX60_04445	MA20_05865	5.99684	63.8599	4.86236e-06								ACX60_10375	fba	1.56158	2.95176	0.0189937
ACX60_16635	ACX60_16635	-1.57101	2.97113	0.0431339		ACX60_10860	ACX60_10860	-2.07583	4.21588	0.0125391		ACX60_02795	cusA	3.04337	8.24413	0.000174571		ACX60_05625	cirA	3.08174	8.46637	4.95601e-06								ACX60_16000	infA	1.56232	2.95329	0.011045
ACX60_06000	ACX60_06000	-1.88313	3.68875	0.0433338		ACX60_12060	ACX60_12060	-2.07543	4.2147	0.0477838		ACX60_17500	rhiB	4.37906	20.8079	0.000184083		ACX60_03760	basS	2.4475	5.45469	5.05608e-06								ACX60_00380	hutU	1.58135	2.99249	0.000806459
ACX60_16500	yrrK	-1.57914	2.98791	0.0444732		ACX60_03080	acd	-2.07405	4.21067	2.23093e-06		ACX60_18655	repC	8.48611	358.569	0.000184083		ACX60_09685	ACX60_09685	2.30913	4.95583	5.70929e-06								ACX60_03265	cysI	1.58475	2.99956	0.000632159
ACX60_00115	ACX60_00115	-5.63715	49.7682	0.0470615		ACX60_14710	ACX60_14710	-2.07213	4.20507	0.000320125		ACX60_00035	yheS	1.56653	2.96192	0.000187275		ACX60_08385	pcaB	5.64499	50.0393	6.13601e-06								ACX60_03315	rsmC	1.58564	3.00141	0.028675
ACX60_11140	glnP7	-1.71607	3.2854	0.0479174		ACX60_07105	ACX60_07105	-2.0714	4.20294	0.00750902		ACX60_00970	ACX60_00970	1.94127	3.84043	0.000197628		ACX60_09730	ACX60_09730	3.02353	8.13152	7.26969e-06								ACX60_09495	ybaB	1.58825	3.00684	0.000450415
ACX60_08150	ACX60_08150	-1.61727	3.06794	0.0479174		ACX60_02700	NA	-2.07072	4.20095	0.0069953		ACX60_00750	ACX60_00750	3.26884	9.63868	0.000217771		ACX60_09470	osmB	4.81467	28.1424	7.38151e-06								ACX60_18265	ACX60_18265	1.59048	3.01149	0.0146785
ACX60_16150	ACX60_16150	-2.54986	5.85576	0.0489367		ACX60_00155	ppc	-2.0648	4.18376	3.29795e-05		ACX60_18715	parA	4.53389	23.1653	0.000217771		ACX60_09275	aspA	2.96059	7.7844	7.74508e-06								ACX60_12260	pyrC	1.5977	3.0266	0.00885497
ACX60_09480	ACX60_09480	-1.68258	3.21001	0.0492754		ACX60_06170	ACX60_06170	-2.05904	4.1671	0.00163165		ACX60_14855	ACX60_14855	2.43462	5.40621	0.000218908		ACX60_05665	ACX60_05665	3.03221	8.18063	8.27961e-06								ACX60_12650	lysC	1.59927	3.02991	0.00569174
ACX60_07240	mgtA	8.08019	270.632	6.00429e-08		ACX60_18425	NA	-2.0586	4.16581	0.0126885		ACX60_13845	emrA	2.50606	5.68067	0.000222993		ACX60_08405	pcaH	6.1079	68.9699	8.45872e-06								ACX60_04195	groS	1.60054	3.03257	0.026148
ACX60_07245	mgtC	4.68671	25.7537	3.04593e-07		ACX60_12980	ACX60_12980	-2.05686	4.16079	0.00181606		ACX60_18650	ACX60_18650	4.26415	19.2149	0.00024212		ACX60_16820	ACX60_16820	3.22456	9.34735	8.62418e-06								ACX60_04510	htrB	1.60334	3.03845	0.00228133
ACX60_15865	rpmB	3.07746	8.44125	7.41017e-07		ACX60_05185	icd	-2.0514	4.14507	9.9995e-06		ACX60_18575	topA	2.08756	4.25027	0.000244689		ACX60_03765	ACX60_03765	5.21542	37.1534	1.13226e-05								ACX60_05465	efp	1.60425	3.04037	0.0114351
ACX60_15960	gltT	2.60093	6.06676	1.32604e-06		ACX60_16560	fadB	-2.04932	4.13911	4.08248e-05		ACX60_18630	ACX60_18630	2.65976	6.31929	0.000244689		ACX60_11220	ACX60_11220	5.37046	41.3685	1.13226e-05								ACX60_13255	rnfB	1.61149	3.05568	0.00928271
ACX60_12015	ACX60_12015	4.1655	17.9449	1.49497e-06		ACX60_18335	ACX60_18335	-2.04507	4.12694	0.0029209		ACX60_17515	ACX60_17515	5.23964	37.7822	0.000244689		ACX60_05620	fatB	3.84192	14.3394	1.15247e-05								ACX60_18270	ACX60_18270	1.61305	3.05898	0.0130897
ACX60_02130	rplP	3.22662	9.36072	1.92417e-06		ACX60_13930	ACX60_13930	-2.04197	4.11806	0.00288801		ACX60_05410	surE	2.34705	5.08783	0.000253182		ACX60_15880	ACX60_15880	2.41226	5.32306	1.36052e-05								ACX60_16690	secE	1.62489	3.08419	0.0013811
ACX60_03510	sanA	3.7088	13.0756	1.98918e-06		ACX60_14100	yeaX	-2.04171	4.11734	0.0136133		ACX60_01025	azlC	2.7776	6.85709	0.000269546		ACX60_00980	ACX60_00980	2.71703	6.57517	1.39325e-05								ACX60_03905	yeeF	1.63727	3.11077	0.00139249
ACX60_03860	rplU	3.62896	12.3716	2.68233e-06		ACX60_05755	ACX60_05755	-2.04127	4.11606	7.20138e-06		ACX60_08990	ACX60_08990	5.3225	40.0157	0.00028002		ACX60_14860	ACX60_17670	2.14855	4.43382	1.99775e-05								ACX60_03325	typA	1.64893	3.13601	0.0088922
ACX60_00670	ACX60_00670	3.5129	11.4153	3.03949e-06		ACX60_06505	csuE	-2.04013	4.11281	0.0186471		ACX60_09515	yafE	2.8874	7.39938	0.000287401		ACX60_14525	ACX60_14525	2.72425	6.60819	2.47257e-05								ACX60_00845	guaB	1.65092	3.14034	0.00460031
ACX60_09280	ACX60_09280	2.50745	5.68615	3.55021e-06		ACX60_05720	xdhA	-2.03923	4.11026	0.00481659		ACX60_10855	ACX60_10855	4.91739	30.2191	0.000296827		ACX60_17565	mmsA	3.38661	10.4585	2.51713e-05								ACX60_02150	rplX	1.65204	3.14277	0.0119573
ACX60_01085	ACX60_01085	4.12105	17.4005	3.58718e-06		ACX60_10220	ACX60_10220	-2.02541	4.07107	0.0155572		ACX60_18685	ACX60_18685	7.56076	188.805	0.000296827		ACX60_04675	ACX60_04675	3.90459	14.9761	3.12563e-05								ACX60_10555	queG	1.65926	3.15854	0.0142539
ACX60_10385	pgk	3.33315	10.0781	3.98056e-06		ACX60_02825	ACX60_02825	-2.02148	4.05999	0.000970911		ACX60_02350	xpt	2.66807	6.35581	0.000307749		ACX60_13690	pgaB	2.84529	7.1865	3.529e-05								ACX60_01410	czcB	1.66353	3.1679	0.0476746
ACX60_01710	ACX60_01710	2.45759	5.49297	6.3889e-06		ACX60_09240	scoB	-2.01561	4.0435	0.00151599		ACX60_03305	rtcB	2.01214	4.03381	0.000318771		ACX60_04670	entA	4.30074	19.7084	3.74885e-05								ACX60_17250	def	1.66426	3.1695	0.000700118
ACX60_04635	purL	2.44462	5.44383	8.58666e-06		ACX60_11390	srpA	-2.01501	4.04184	6.93619e-06		ACX60_03950	yceA	2.1407	4.40976	0.000330637		ACX60_10565	ACX60_10565	5.78243	55.0407	3.74885e-05								ACX60_07915	pyrH	1.67177	3.18606	0.0103079
ACX60_14150	coaD	2.43369	5.40275	1.50581e-05		ACX60_18215	ACX60_18215	-2.0124	4.03452	0.000216547		ACX60_16610	ACX60_16610	3.54787	11.6954	0.000338597		ACX60_05650	hdc	4.89568	29.7678	3.88213e-05								ACX60_17625	rluA	1.67726	3.1982	0.042081
ACX60_03730	rssA	2.74498	6.7038	1.57393e-05		ACX60_18565	NA	-2.00929	4.02583	0.000197569		ACX60_12425	ACX60_12425	5.00964	32.2146	0.000339693		ACX60_01925	ACX60_14160	2.1148	4.33131	4.3679e-05								ACX60_14040	tuf	1.67849	3.20094	0.0186054
ACX60_10750	ACX60_10750	2.72835	6.62698	2.11838e-05		ACX60_01940	ACX60_01940	-2.00669	4.0186	0.00190003		ACX60_10810	gltP	2.69481	6.4747	0.000346954		ACX60_09530	ACX60_09530	2.81649	7.04447	4.3679e-05								ACX60_18960	ACX60_18960	1.68315	3.21129	0.0007093
ACX60_05410	surE	2.88281	7.37584	2.13957e-05		ACX60_16085	ACX60_16085	-2.00618	4.01717	0.000737395		ACX60_01920	ACX60_01920	4.38285	20.8627	0.000352654		ACX60_12120	ACX60_12120	2.90894	7.51069	4.3679e-05								ACX60_02005	corA	1.68554	3.21662	0.0490402
ACX60_09495	ybaB	2.01673	4.04665	2.42368e-05		ACX60_15260	glxR	-1.99731	3.99255	0.0383709		ACX60_09130	acrF	2.64028	6.23451	0.00035749		ACX60_04680	ACX60_04680	3.14167	8.82546	4.3679e-05								ACX60_16685	nusG	1.69019	3.22699	0.0237649
ACX60_05735	yfcN	2.79568	6.9436	2.52845e-05		ACX60_03945	ACX60_03945	-1.99416	3.98384	0.000242182		ACX60_04435	arnT	4.11252	17.2978	0.000360774		ACX60_11195	ACX60_11195	4.68244	25.6777	4.3679e-05								ACX60_02165	rpsH	1.69279	3.23282	0.0459366
ACX60_05960	mrdB	2.78228	6.87939	2.77859e-05		ACX60_05280	ACX60_05280	-1.99295	3.9805	0.000213744		ACX60_00670	ACX60_00670	2.34749	5.08939	0.000370537		ACX60_17560	mmsB	2.83687	7.14469	4.47412e-05								ACX60_07920	frr	1.69555	3.239	0.0265168
ACX60_08225	ACX60_08225	2.31534	4.97721	3.5574e-05		ACX60_16335	pap	-1.98162	3.94937	8.95974e-07		ACX60_18615	ACX60_18615	4.99762	31.9474	0.000370537		ACX60_07170	ACX60_07170	2.60742	6.09413	4.97384e-05								ACX60_16615	htpG	1.70326	3.25636	0.0116752
ACX60_14240	panD	3.6309	12.3882	3.66161e-05		ACX60_11125	cjaA	-1.9803	3.94574	0.00446405		ACX60_15865	rpmB	1.80688	3.49886	0.000373495		ACX60_07845	ACX60_07845	1.99047	3.97365	5.13999e-05								ACX60_05405	ACX60_05405	1.70511	3.26054	0.0339064
ACX60_14460	mtnN	3.14681	8.85698	4.97912e-05		ACX60_03395	phnA	-1.9607	3.8925	0.0493124		ACX60_18295	umuC	3.85457	14.4658	0.000389435		ACX60_06780	ACX60_06780	2.18643	4.55176	5.13999e-05								ACX60_17860	nadC	1.70935	3.27014	0.0277919
ACX60_15350	prfC	1.75829	3.38296	5.34865e-05		ACX60_03630	ACX60_03630	-1.96058	3.89218	0.00125357		ACX60_07195	ACX60_07195	3.43064	10.7827	0.000430087		ACX60_13075	ACX60_13075	1.7863	3.4493	5.21795e-05								ACX60_16550	ACX60_16550	1.70995	3.27149	0.0337983
ACX60_03950	yceA	2.49491	5.63694	5.91933e-05		ACX60_03235	fadB	-1.9604	3.89171	0.000435385		ACX60_01610	bfd	2.46196	5.50963	0.00043686		ACX60_05200	MA20_07835	2.82109	7.06696	5.38882e-05								ACX60_14225	prs	1.71246	3.2772	0.0219554
ACX60_14145	fdx1	1.97944	3.94339	9.43624e-05		ACX60_13115	ACX60_13115	-1.95892	3.88771	0.0104256		ACX60_12015	ACX60_12015	2.50299	5.66859	0.00043686		ACX60_03755	ACX60_03755	2.37507	5.18762	5.39778e-05								ACX60_05035	ACX60_05035	1.71449	3.28181	0.0189164
ACX60_16690	secE	2.06412	4.1818	0.000100956		ACX60_07810	ACX60_07810	-1.95106	3.86658	0.00457324		ACX60_08500	gatA	4.26731	19.257	0.000443534		ACX60_08415	aroD	5.42438	42.944	5.49325e-05								ACX60_10750	ACX60_10750	1.71961	3.29348	0.00337671
ACX60_12010	ACX60_12010	4.2356	18.8383	0.000115029		ACX60_04995	ydfG	-1.95022	3.86434	0.000134093		ACX60_18130	ygiC	3.00689	8.03832	0.000444807		ACX60_01790	ACX60_01790	2.87753	7.34891	6.1491e-05								ACX60_02895	secF	1.72553	3.307	0.0377133
ACX60_13170	ACX60_13170	1.9728	3.9253	0.000124597		ACX60_14690	xkdA	-1.94948	3.86236	0.00837706		ACX60_13255	rnfB	2.24649	4.74528	0.000449941		ACX60_06400	ACX60_06400	3.63577	12.4302	6.16653e-05								ACX60_02740	ACX60_02740	1.74541	3.35291	0.0289925
ACX60_07160	aleB	1.58701	3.00427	0.000131157		ACX60_03210	yqfA	-1.9492	3.8616	4.18429e-05		ACX60_08490	ACX60_08490	5.3505	40.8	0.000449941		ACX60_16035	ACX60_16035	3.4626	11.0242	6.45908e-05								ACX60_05620	fatB	1.7492	3.36173	0.0211541
ACX60_15730	ACX60_15730	1.87748	3.67433	0.000132652		ACX60_11785	NA	-1.94748	3.85699	0.00060431		ACX60_04685	ACX60_04685	2.46485	5.5207	0.000464045		ACX60_04435	arnT	4.66288	25.3319	7.46511e-05								ACX60_15800	lgt	1.74968	3.36285	0.0313576
ACX60_03305	rtcB	2.13067	4.37922	0.000137385		ACX60_01780	parA	-1.94001	3.8371	9.52471e-05		ACX60_18265	ACX60_18265	2.33934	5.06071	0.00047242		ACX60_08060	ACX60_08060	1.93773	3.83101	7.86805e-05								ACX60_02240	sdhE	1.7558	3.37714	0.0114791
ACX60_17115	yicG	2.40063	5.28034	0.000137385		ACX60_18800	NA	-1.93826	3.83244	0.0139472		ACX60_09095	ACX60_09095	6.35942	82.106	0.000507609		ACX60_09675	ACX60_09675	2.41606	5.33712	8.11366e-05								ACX60_16555	lpxO	1.75857	3.38363	0.0030256
ACX60_02350	xpt	2.82231	7.07296	0.00014751		ACX60_16010	ACX60_16010	-1.93826	3.83244	0.000345953		ACX60_17870	ACX60_17870	1.77069	3.41218	0.000527488		ACX60_16155	ACX60_16155	1.72608	3.30827	8.29572e-05								ACX60_17795	ACX60_17795	1.76771	3.40514	0.00213383
ACX60_08195	cydB	2.18576	4.54965	0.000151077		ACX60_14430	ACX60_14430	-1.93041	3.81163	0.00035003		ACX60_11025	mdcA	3.37473	10.3728	0.000530578		ACX60_06605	ACX60_06605	2.73146	6.64127	8.29572e-05								ACX60_05410	surE	1.77881	3.43144	0.00311339
ACX60_08850	ACX60_08850	1.66733	3.17625	0.000160325		ACX60_15330	acnA	-1.92998	3.81049	0.000271614		ACX60_18640	ACX60_18640	2.07837	4.22331	0.000536226		ACX60_12210	mdmC	2.16378	4.48087	0.000104706								ACX60_10930	tauA	1.78986	3.45782	0.000676995
ACX60_10575	ACX60_10575	2.92892	7.6154	0.000166028		ACX60_06150	ACX60_06150	-1.92993	3.81037	8.38914e-06		ACX60_17165	ACX60_17165	4.43098	21.5703	0.000537835		ACX60_10605	yyaM	2.70496	6.52038	0.000111032								ACX60_18325	ACX60_18325	1.79159	3.46195	0.000102714
ACX60_03325	typA	2.56086	5.90058	0.000168411		ACX60_13790	ACX60_13790	-1.92371	3.79397	0.00206405		ACX60_05640	entE	3.30732	9.89923	0.00056232		ACX60_05610	bauC	6.48597	89.6336	0.000134597								ACX60_10730	ychF	1.80378	3.49133	0.0183547
ACX60_01810	mmuP	2.23788	4.71703	0.000174145		ACX60_13385	ACX60_13385	-1.92013	3.78457	4.23086e-05		ACX60_12525	ACX60_12525	6.79857	111.32	0.00056232		ACX60_18040	ACX60_18040	2.50218	5.6654	0.000146492								ACX60_06700	rplI	1.80716	3.49952	0.0343047
ACX60_03265	cysI	1.71989	3.29411	0.000185894		ACX60_00380	hutU	-1.91727	3.77709	4.23086e-05		ACX60_10865	arsB	5.02692	32.6026	0.000692223		ACX60_07205	ACX60_07205	3.33942	10.122	0.00014756								ACX60_17310	atpD	1.82076	3.53267	0.00189032
ACX60_12650	lysC	2.26814	4.81703	0.000218204		ACX60_02920	ACX60_02920	-1.91425	3.76919	0.00837706		ACX60_05595	ACX60_05595	2.38295	5.21602	0.000714027		ACX60_17070	dapA2	2.2857	4.876	0.000149835								ACX60_03025	ACX60_03025	1.82575	3.54492	0.000517248
ACX60_10415	sstT	2.02073	4.0579	0.000238631		ACX60_16565	fadA	-1.91419	3.76903	1.70865e-05		ACX60_07545	ACX60_07545	4.85351	28.9103	0.000771664		ACX60_03810	ACX60_03810	1.92887	3.80756	0.000178173								ACX60_15195	panC	1.8311	3.55807	0.00471929
ACX60_06975	ACX60_06975	3.26313	9.60061	0.000239877		ACX60_09420	ACX60_09420	-1.91357	3.76741	0.00667729		ACX60_17950	ssuC	3.90377	14.9675	0.000777984		ACX60_08375	pcaJ	6.52263	91.9409	0.000188425								ACX60_00365	ACX60_00365	1.83358	3.56419	0.000461609
ACX60_12265	pyrB	2.31236	4.96694	0.000240756		ACX60_07905	glnL	-1.91331	3.76672	1.98449e-05		ACX60_16450	pilB	2.50267	5.66731	0.000782721		ACX60_08370	pcaI	7.49141	179.944	0.000193606								ACX60_04100	yhbY	1.83935	3.57848	0.00618797
ACX60_07860	ACX60_07860	2.06629	4.18809	0.000257353		ACX60_05845	ACX60_05845	-1.90825	3.75354	3.55336e-05		ACX60_18285	ACX60_18285	3.7175	13.1546	0.00078427		ACX60_15840	exbB	1.90259	3.73883	0.000199174								ACX60_17325	atpH	1.84072	3.58189	0.000453307
ACX60_01685	trmD	2.16802	4.49405	0.000257353		ACX60_05930	msmR	-1.90668	3.74944	0.0153968		ACX60_18360	ACX60_18360	2.2291	4.68841	0.000796675		ACX60_04935	mucD	1.90426	3.74318	0.000199849								ACX60_07335	ptpA	1.84206	3.58522	0.00619233
ACX60_04240	ttcA	1.91952	3.78298	0.000261566		ACX60_16905	uvrY	-1.90132	3.73556	0.00213743		ACX60_01575	ACX60_01575	5.27672	38.7659	0.000796675		ACX60_03870	lolA	1.86844	3.65137	0.000237039								ACX60_17425	guaA	1.84256	3.58645	0.000250671
ACX60_01255	hisF	1.91629	3.77452	0.000270521		ACX60_17780	ACX60_17780	-1.89902	3.7296	0.000139898		ACX60_17675	fabB	5.53794	46.4608	0.000823696		ACX60_00725	ACX60_00725	1.5287	2.88526	0.000238429								ACX60_12945	aroP	1.84348	3.58875	0.00164141
ACX60_07910	rimO	2.05746	4.16252	0.000279531		ACX60_18210	ACX60_18210	-1.89894	3.72939	0.0477385		ACX60_10585	mrkC	2.60759	6.09485	0.00083481		ACX60_07095	ACX60_07095	4.12402	17.4363	0.000300822								ACX60_03730	rssA	1.85709	3.62276	0.00123885
ACX60_16550	ACX60_16550	2.79021	6.91732	0.000295553		ACX60_17570	ACX60_17570	-1.89829	3.72771	0.00457846		ACX60_18665	trbJ	5.57436	47.6486	0.000864945		ACX60_16620	ACX60_16620	2.46692	5.52864	0.000311348								ACX60_04395	ACX60_04395	1.86958	3.65425	0.0255476
ACX60_02205	rpsM	1.9083	3.75367	0.00032682		ACX60_00410	gph	-1.89812	3.72727	0.0105549		ACX60_18695	arsB	3.66085	12.6481	0.000867042		ACX60_16870	feoB	1.75065	3.3651	0.000338457								ACX60_05735	yfcN	1.87379	3.66495	0.0018712
ACX60_06005	glyA	2.14806	4.43233	0.000329056		ACX60_18330	NA	-1.88792	3.70102	0.000101248		ACX60_07525	ACX60_07525	6.5252	92.1044	0.000897885		ACX60_09605	ACX60_09605	4.24914	19.016	0.000345498								ACX60_16470	ACX60_16470	1.87418	3.66592	0.010934
ACX60_04955	lepB	2.06752	4.19167	0.00034071		ACX60_18455	NA	-1.88614	3.69645	0.0379125		ACX60_17115	yicG	2.01494	4.04164	0.00090742		ACX60_11455	paaF	3.89772	14.9049	0.000355127								ACX60_17740	manB	1.87619	3.67104	0.000456786
ACX60_00365	ACX60_00365	1.83886	3.57727	0.000370006		ACX60_06495	csuC	-1.88075	3.68267	0.00228059		ACX60_15365	ACX60_15365	2.05145	4.14522	0.000922466		ACX60_02070	hmp	1.75733	3.38071	0.000361201								ACX60_09265	ACX60_09265	1.87905	3.67832	0.0135759
ACX60_18075	ACX60_18075	3.20691	9.23372	0.000370006		ACX60_16910	kinA	-1.8794	3.67922	0.0119753		ACX60_07540	ACX60_07540	4.3094	19.827	0.000925813		ACX60_16275	hslO	1.65665	3.15284	0.000403798								ACX60_14050	rpsG	1.88342	3.68949	0.00879479
ACX60_00495	dtd	2.23236	4.69901	0.000390129		ACX60_11310	MA20_35585	-1.87459	3.66696	0.00209288		ACX60_17435	ACX60_17435	5.3673	41.278	0.000927312		ACX60_13500	ACX60_13500	3.8638	14.5586	0.000403798								ACX60_05855	metF	1.88404	3.69107	0.000841085
ACX60_04970	era	1.63147	3.09829	0.000412544		ACX60_09880	gsiA	-1.86425	3.64078	1.17051e-05		ACX60_12180	benK	5.69639	51.8542	0.000966699		ACX60_08685	ACX60_08685	4.95423	31.0006	0.000411079								ACX60_04955	lepB	1.89122	3.7095	0.00109985
ACX60_13255	rnfB	2.24797	4.75014	0.000433384		ACX60_08940	ACX60_08940	-1.86222	3.63566	0.013725		ACX60_02425	ACX60_02425	2.19813	4.58884	0.000998753		ACX60_17155	ACX60_17155	1.66615	3.17366	0.000421406								ACX60_08435	ACX60_08435	1.89606	3.72196	0.0135759
ACX60_00845	guaB	2.1133	4.32681	0.000434277		ACX60_14365	bfrA	-1.85514	3.61786	0.0176956		ACX60_02785	czcC	4.19212	18.2791	0.00100836		ACX60_12830	hcaG	2.98461	7.91512	0.00042369								ACX60_18870	ACX60_18870	1.90392	3.7423	0.0014158
ACX60_16600	frnE	1.72371	3.30284	0.000438472		ACX60_03565	ece2	-1.84975	3.60437	0.00249499		ACX60_05650	hdc	3.6314	12.3925	0.0010732		ACX60_11485	paaN	2.66482	6.34147	0.000484517								ACX60_10815	ansB	1.90718	3.75076	0.000162903
ACX60_18195	rpmH	3.73233	13.2906	0.000438472		ACX60_06555	pqiB	-1.84927	3.60317	0.00234433		ACX60_11755	uca	2.68724	6.44081	0.00108518		ACX60_12135	cueR	4.04598	16.5182	0.000499865								ACX60_03125	btuB	1.91275	3.76527	0.000983477
ACX60_05370	purB	2.16996	4.50011	0.000457937		ACX60_11830	ACX60_11830	-1.84687	3.5972	0.00952021		ACX60_14240	panD	2.56357	5.9117	0.00113069		ACX60_15835	exbD2	2.00623	4.01731	0.000501475								ACX60_10410	bigR	1.93029	3.81131	0.0179492
ACX60_03540	ACX60_03540	2.3158	4.9788	0.000463593		ACX60_12310	crp	-1.84296	3.58745	0.00613475		ACX60_08830	ACX60_08830	4.32158	19.9952	0.00113523		ACX60_00640	ACX60_00640	1.67971	3.20363	0.000549673								ACX60_06490	csuB	1.93091	3.81294	0.00133482
ACX60_12240	trmB	1.94115	3.84013	0.00047724		ACX60_18965	ACX60_18965	-1.84027	3.58077	0.000181535		ACX60_18070	ACX60_18070	5.89322	59.434	0.00114827		ACX60_03515	cysJ	1.79138	3.46146	0.000549673								ACX60_01675	rpsP	1.93254	3.81726	0.00298236
ACX60_14200	ispE	2.10198	4.29299	0.000528534		ACX60_00415	murI	-1.83344	3.56385	0.00030773		ACX60_17575	cycA	2.77454	6.8426	0.00118569		ACX60_10810	gltP	2.5535	5.87057	0.000625412								ACX60_07245	mgtC	1.93627	3.82715	0.00548932
ACX60_09265	ACX60_09265	2.61117	6.10998	0.00056468		ACX60_16020	ACX60_16020	-1.82468	3.54229	0.000275633		ACX60_11750	ACX60_11750	2.65186	6.28479	0.00122518		ACX60_11480	paaA	3.61758	12.2744	0.000625412								ACX60_17340	atpB	1.94182	3.84191	0.0018712
ACX60_03035	ACX60_03035	1.94435	3.84866	0.000573278		ACX60_10790	msmR	-1.82444	3.5417	0.0214099		ACX60_08485	ACX60_08485	5.21059	37.0292	0.00123839		ACX60_16600	frnE	1.6919	3.23081	0.000625468								ACX60_02925	queA	1.94489	3.85009	0.000244077
ACX60_13700	yaeQ	2.6313	6.19583	0.000592311		ACX60_03665	MA20_28095	-1.82317	3.53858	0.000491576		ACX60_04220	acrB	1.59307	3.0169	0.00129277		ACX60_06995	miaA	2.3785	5.19995	0.000659889								ACX60_16850	gluQ	1.94724	3.85636	0.00253459
ACX60_02525	rplM	1.91055	3.75952	0.000599308		ACX60_07110	papD	-1.82242	3.53674	0.0148346		ACX60_10815	ansB	1.509	2.84612	0.00129758		ACX60_00490	ACX60_00490	1.88861	3.70279	0.0007056								ACX60_17315	atpG	1.94745	3.85693	0.00188616
ACX60_18115	ybjG	2.50011	5.65729	0.000604374		ACX60_07710	NA	-1.82122	3.53379	0.000296339		ACX60_07655	ACX60_07655	1.57387	2.97703	0.00129758		ACX60_11475	paaB	2.21059	4.62865	0.000736236								ACX60_00245	mutY	1.94858	3.85995	0.0039753
ACX60_05745	trpD	2.28297	4.86678	0.00063926		ACX60_16785	algR	-1.81738	3.52441	2.88023e-05		ACX60_12945	aroP	1.8111	3.50911	0.00129758		ACX60_15390	ydcR	1.51052	2.84913	0.00076449								ACX60_17115	yicG	1.96113	3.89367	0.00177067
ACX60_06075	fpr	2.07454	4.21211	0.00070511		ACX60_01245	ACX60_01245	-1.81722	3.52402	0.0389116		ACX60_18460	ftsK	1.95141	3.86753	0.00129758		ACX60_08145	ACX60_13160	2.14348	4.41825	0.000857023								ACX60_01255	hisF	1.9696	3.91659	0.000337533
ACX60_12260	pyrC	2.05703	4.1613	0.000749706		ACX60_17620	ACX60_17620	-1.8144	3.51715	0.00023494		ACX60_11870	pcaK	4.83959	28.6327	0.00129758		ACX60_05515	slsA	2.29671	4.91335	0.000857023								ACX60_18115	ybjG	1.9726	3.92476	0.00616847
ACX60_18095	purE	1.9657	3.90603	0.000792455		ACX60_09850	yraR	-1.81094	3.50871	0.00806316		ACX60_01040	gabR_1	2.45121	5.46874	0.00136244		ACX60_10610	ACX60_10610	2.38032	5.20653	0.000857023								ACX60_10590	ACX60_10590	1.98224	3.95107	0.000356589
ACX60_00965	ACX60_00965	2.35255	5.10726	0.000792745		ACX60_04355	ydeP	-1.80638	3.49764	9.39506e-05		ACX60_01930	ACX60_01930	2.66569	6.3453	0.00136244		ACX60_17865	ACX60_17865	2.71358	6.55946	0.000857023								ACX60_13700	yaeQ	1.9946	3.98506	0.0156556
ACX60_01450	mmuP	1.65407	3.14719	0.000804431		ACX60_13450	ybbA	-1.80486	3.49395	0.00394566		ACX60_09610	ACX60_09610	1.93054	3.81198	0.00136353		ACX60_14350	otsB	3.92721	15.2128	0.000967336								ACX60_13050	argG	1.99563	3.9879	0.00115159
ACX60_14235	pth	1.89765	3.72606	0.000806308		ACX60_13355	ytfL	-1.80458	3.49327	4.31463e-05		ACX60_08565	pac	4.18529	18.1927	0.00136353		ACX60_11435	paaK	2.22511	4.67547	0.00100713								ACX60_18100	ACX60_18100	2.00477	4.01324	0.00127251
ACX60_10730	ychF	2.64185	6.24129	0.000848065		ACX60_14425	ACX60_14425	-1.79663	3.47407	0.00241934		ACX60_18440	ACX60_18440	3.49023	11.2373	0.00136986		ACX60_09660	mtlD	1.62352	3.08126	0.00102107								ACX60_05225	ACX60_05225	2.02215	4.0619	0.00189473
ACX60_10510	metK	2.11361	4.32772	0.000875987		ACX60_11680	evpA	-1.79449	3.46892	0.0259489		ACX60_18425	ACX60_18425	2.43597	5.41127	0.00140926		ACX60_13735	betT	1.97242	3.92427	0.00102946								ACX60_08210	ACX60_08210	2.03148	4.08825	0.0260838
ACX60_07890	argF	1.63081	3.09686	0.000945646		ACX60_12430	ACX60_12430	-1.78894	3.4556	0.00300836		ACX60_02130	rplP	1.7452	3.35241	0.00142795		ACX60_13240	ACX60_13240	1.71113	3.27416	0.00106752								ACX60_05100	dusB	2.03299	4.09252	0.0125355
ACX60_04080	carB	1.85276	3.61191	0.000950951		ACX60_18460	ftsK	-1.78398	3.44374	0.00244117		ACX60_18490	ACX60_18490	3.54096	11.6395	0.00154738		ACX60_09690	ACX60_09690	3.60766	12.1903	0.00111565								ACX60_14505	acdS	2.03307	4.09276	0.042081
ACX60_11945	yigZ	1.76746	3.40455	0.000952002		ACX60_09575	ybhS	-1.78052	3.43551	0.0289893		ACX60_08955	metF	2.95325	7.7449	0.00158419		ACX60_03050	phuR	1.56927	2.96755	0.00114769								ACX60_04570	trmH	2.04427	4.12463	0.00454397
ACX60_01005	ACX60_01005	2.16005	4.46931	0.00095311		ACX60_05765	pepP	-1.77725	3.42773	7.22599e-05		ACX60_10630	ACX60_10630	4.02045	16.2284	0.00158986		ACX60_09045	ACX60_09045	1.99657	3.99051	0.00118734								ACX60_00030	dedA	2.0502	4.14164	0.0107094
ACX60_09855	rpsT	2.52785	5.7671	0.00095311		ACX60_15650	ACX60_15650	-1.77648	3.42589	0.00240842		ACX60_00980	ACX60_00980	1.76625	3.40168	0.00162655		ACX60_04205	dgkA	3.24558	9.48454	0.00120976								ACX60_18125	ACX60_18125	2.05215	4.14725	0.0253214
ACX60_03320	xanP	2.37002	5.16947	0.00102451		ACX60_16605	ACX60_16605	-1.77598	3.4247	0.000303178		ACX60_12420	ACX60_12420	7.37102	165.538	0.00164463		ACX60_11460	paaE	2.9841	7.91234	0.00125185								ACX60_06005	glyA	2.05221	4.14739	0.000625593
ACX60_17325	atpH	1.66545	3.17212	0.00103305		ACX60_09395	lpdA	-1.77332	3.4184	0.00768558		ACX60_05610	bauC	5.13391	35.1124	0.0016704		ACX60_11225	ACX60_11225	4.34887	20.377	0.00127329								ACX60_12265	ACX60_17860	2.05363	4.15148	0.00101672
ACX60_14025	rimI	2.27246	4.83148	0.00104539		ACX60_14935	ACX60_14935	-1.77247	3.41638	0.0163446		ACX60_10930	tauA	1.5783	2.98617	0.00169017		ACX60_09065	ACX60_09065	1.69914	3.24707	0.00128496								ACX60_14055	ACX60_14055	2.05422	4.1532	0.0107891
ACX60_17335	atpE	2.60007	6.06317	0.00109753		ACX60_03805	sadH	-1.77118	3.41333	0.0294321		ACX60_07565	ACX60_07565	2.98817	7.93467	0.00169418		ACX60_07265	tal	1.55397	2.93624	0.00132071								ACX60_02160	rpsN	2.08326	4.23764	0.0163672
ACX60_01680	rimM	2.07223	4.20535	0.00109919		ACX60_01470	ACX60_01470	-1.7665	3.40227	0.00055941		ACX60_18090	purK	1.59569	3.02238	0.00173874		ACX60_05905	ompW	2.97904	7.88461	0.001389								ACX60_10655	yebC	2.08589	4.24538	0.00182051
ACX60_05445	rpmE	3.32072	9.99163	0.00111208		ACX60_10445	gcvH	-1.76113	3.38964	0.00784483		ACX60_18255	ACX60_18255	1.60428	3.04045	0.00173874		ACX60_06785	ACX60_06785	2.33678	5.05176	0.00139803								ACX60_02205	rpsM	2.09143	4.26171	0.000162903
ACX60_10815	ansB	1.54071	2.90939	0.00111798		ACX60_18375	ACX60_18375	-1.75627	3.37824	0.0114629		ACX60_16815	ywfM	4.82153	28.2764	0.00175116		ACX60_03085	ACX60_03085	1.98747	3.96541	0.00147002								ACX60_02170	rplF	2.09288	4.266	0.0123309
ACX60_14890	rsmJ	1.70622	3.26304	0.00116623		ACX60_03670	ACX60_03670	-1.75561	3.37668	0.00300218		ACX60_07675	ACX60_07675	2.06799	4.19303	0.00177846		ACX60_15110	himA	2.67748	6.39736	0.00149364								ACX60_18430	ACX60_18430	2.1027	4.29513	0.0038171
ACX60_06980	rluA	1.91514	3.77151	0.00122697		ACX60_00300	dapA	-1.75246	3.36933	0.00010209		ACX60_12985	ACX60_12985	3.22021	9.31919	0.00177846		ACX60_08155	ACX60_08155	2.11206	4.32309	0.0015069								ACX60_18495	ACX60_18495	2.10321	4.29664	0.0211541
ACX60_05035	ACX60_05035	2.4498	5.4634	0.00130018		ACX60_06480	csuA/B	-1.75168	3.3675	0.00204643		ACX60_07510	ACX60_07510	5.03384	32.7594	0.00177846		ACX60_11440	pcaF	2.37961	5.20395	0.0015069								ACX60_07860	ACX60_07860	2.10929	4.31478	0.00027608
ACX60_10410	bigR	2.62661	6.17572	0.0013484		ACX60_09445	trpB	-1.75062	3.36504	0.0200586		ACX60_18410	ACX60_18410	1.69452	3.2367	0.00178453		ACX60_12130	ACX60_12130	4.70826	26.1414	0.0015069								ACX60_03950	yceA	2.11123	4.32059	0.000429918
ACX60_10590	ACX60_10590	1.67995	3.20416	0.00142553		ACX60_05045	ycdB	-1.74151	3.34386	3.106e-05		ACX60_15940	uup	1.71351	3.27959	0.00178453		ACX60_16610	ACX60_16610	3.02585	8.14462	0.0015235								ACX60_02190	rplO	2.13002	4.37723	0.00393114
ACX60_14295	yceD	1.75194	3.36811	0.00142613		ACX60_00340	maiA	-1.73973	3.33973	0.042109		ACX60_18540	ACX60_18540	2.12486	4.3616	0.00183761		ACX60_06515	proP	1.71482	3.28257	0.00152561								ACX60_18445	ACX60_18445	2.13859	4.40333	0.00162633
ACX60_04575	fbp	1.73921	3.33853	0.00146842		ACX60_18970	radC	-1.73973	3.33973	0.00114743		ACX60_18950	ACX60_18950	1.651	3.14051	0.00184032		ACX60_07195	ACX60_07195	2.97606	7.86833	0.00160748								ACX60_18215	ACX60_18215	2.13937	4.4057	0.000236931
ACX60_16860	murD	2.21639	4.64728	0.00156039		ACX60_16070	hcaR	-1.72523	3.30632	2.63116e-05		ACX60_10940	ACX60_10940	4.39303	21.0104	0.00186317		ACX60_04220	acrB	1.55772	2.94387	0.00162213								ACX60_16665	rplL	2.14069	4.40973	0.00325626
ACX60_04530	purM	1.99495	3.98601	0.00173753		ACX60_15255	phaB	-1.72054	3.2956	0.00271518		ACX60_00360	yciC	6.30745	79.2013	0.00186317		ACX60_11465	paaD	2.55712	5.88532	0.00162398								ACX60_13930	ACX60_13930	2.14171	4.41283	0.00221796
ACX60_03520	ACX60_03520	1.83572	3.5695	0.00174125		ACX60_17960	rutR	-1.71931	3.29279	0.00137906		ACX60_10695	ACX60_10695	2.12324	4.35673	0.00190582		ACX60_11420	ACX60_11420	2.83705	7.14559	0.00163853								ACX60_02350	xpt	2.14776	4.43139	0.00347704
ACX60_08970	ACX60_08970	1.86254	3.63648	0.00176178		ACX60_05875	fadE	-1.71587	3.28496	0.00110708		ACX60_01100	ynfL	2.87489	7.33545	0.00191185		ACX60_18260	NA	1.65619	3.15184	0.00165362								ACX60_11930	mdmC	2.1486	4.43398	0.00312566
ACX60_14315	scpB	1.69383	3.23516	0.00184503		ACX60_03385	MA20_15105	-1.71313	3.27871	0.00546447		ACX60_12120	ACX60_12120	2.04842	4.13652	0.00191627		ACX60_11450	paaG	2.37383	5.18317	0.00177204								ACX60_01505	mraY	2.15198	4.44438	0.0396607
ACX60_11245	ACX60_11245	2.81049	7.01522	0.00197895		ACX60_17770	lsgF	-1.71304	3.27851	0.00455727		ACX60_17625	rluA	2.45041	5.46572	0.00191627		ACX60_04655	ACX60_04655	3.60031	12.1284	0.00199592								ACX60_02195	secY	2.1577	4.46203	0.00140951
ACX60_02220	rpoA	1.78884	3.45537	0.00209683		ACX60_09890	ACX60_09890	-1.6955	3.23889	0.00522289		ACX60_12395	ACX60_12395	3.25901	9.57328	0.00191627		ACX60_11395	ACX60_11395	1.73016	3.31765	0.00200158								ACX60_17330	atpF	2.15909	4.46634	0.000326764
ACX60_05335	pstS	1.91489	3.77085	0.00211711		ACX60_10800	msrB	-1.69181	3.23062	0.000315858		ACX60_11650	ACX60_11650	2.48178	5.58585	0.00192547		ACX60_04685	ACX60_04685	2.11259	4.32468	0.00204255								ACX60_04150	folD	2.16886	4.49667	0.002399
ACX60_14415	dusC	2.85272	7.2236	0.00211711		ACX60_00270	yliI	-1.69114	3.22912	0.00405367		ACX60_10870	arsR	4.25455	19.0874	0.00192547		ACX60_12215	ACX60_12215	2.32713	5.01807	0.00204255								ACX60_06330	rpsU	2.17234	4.50754	0.00171825
ACX60_04475	serC	1.9718	3.92256	0.00214552		ACX60_03720	hflC	-1.67923	3.20257	0.000145476		ACX60_09040	ACX60_09040	7.6408	199.577	0.00192547		ACX60_17555	acs-2	2.73322	6.64938	0.00210035								ACX60_02130	rplP	2.17557	4.51763	0.000219417
ACX60_11035	ACX60_11035	2.29782	4.91715	0.00240553		ACX60_03255	oprB	-1.6789	3.20183	0.000365244		ACX60_07200	ompW	2.7275	6.62306	0.00200972		ACX60_11470	paaC	2.51733	5.72523	0.00223638								ACX60_18990	ACX60_18990	2.17618	4.51954	0.00032985
ACX60_06780	yvbT	1.50869	2.84553	0.00257696		ACX60_13865	yfcH	-1.67595	3.1953	0.00574555		ACX60_15280	pntB	2.61705	6.13494	0.00206186		ACX60_10525	fxsA	1.85862	3.62661	0.00235976								ACX60_07730	accB	2.17773	4.52441	0.0327338
ACX60_01690	rplS	2.24124	4.72805	0.00259786		ACX60_02620	ACX60_02620	-1.67019	3.18256	0.000701908		ACX60_05630	iucD	2.04843	4.13656	0.00207507		ACX60_15905	ACX60_15905	1.96778	3.91167	0.00251365								ACX60_04530	purM	2.17789	4.52492	0.000940351
ACX60_06475	ACX60_06475	2.34732	5.0888	0.00260873		ACX60_09845	rraA	-1.66435	3.16971	0.000287335		ACX60_06475	ACX60_06475	2.41056	5.3168	0.00213518		ACX60_16815	ywfM	4.60209	24.2867	0.00284802								ACX60_18255	ACX60_18255	2.17792	4.525	0.000117989
ACX60_01675	rpsP	1.95564	3.87887	0.00264651		ACX60_12905	argD	-1.66001	3.16019	0.0170285		ACX60_09310	ACX60_09310	3.20752	9.23761	0.00217347		ACX60_06655	ACX60_06655	2.2708	4.82592	0.0028872								ACX60_02870	ispZ	2.19246	4.57086	0.00164141
ACX60_18540	ACX60_18540	2.04453	4.12539	0.00264651		ACX60_16015	leuB	-1.65356	3.14608	0.000411942		ACX60_08560	feaB	5.30988	39.6672	0.00217347		ACX60_14355	otsA	2.46676	5.52801	0.00310105								ACX60_18095	purE	2.19621	4.58273	0.000349248
ACX60_09270	ACX60_09270	2.56058	5.89947	0.00269847		ACX60_13490	atsA	-1.64285	3.12282	0.022089		ACX60_10575	ACX60_10575	2.27247	4.83148	0.00217443		ACX60_11240	ACX60_11240	3.3201	9.98732	0.00317993								ACX60_01450	mmuP	2.19915	4.59207	7.34682e-05
ACX60_04150	folD	2.10623	4.30565	0.00287064		ACX60_02490	atuD	-1.64169	3.12031	0.0236259		ACX60_07700	umuC	4.92421	30.3622	0.00218609		ACX60_09365	fccB	2.76462	6.79568	0.00345908								ACX60_02090	rpsJ	2.20579	4.61328	0.000536355
ACX60_03230	ACX60_03230	1.77883	3.43149	0.00287327		ACX60_09430	ACX60_09430	-1.63929	3.11512	0.00185612		ACX60_18290	lexA_2	3.23101	9.38923	0.00219702		ACX60_12005	MA20_42090	2.00507	4.01408	0.00388557								ACX60_16670	rplJ	2.21022	4.62746	0.00104352
ACX60_07915	pyrH	1.94808	3.85861	0.00292702		ACX60_12285	cinA	-1.63872	3.11389	0.00256687		ACX60_04450	ACX60_04450	2.68164	6.41584	0.00222364		ACX60_11065	cidA	3.83748	14.2954	0.00389963								ACX60_15105	ACX60_15105	2.21446	4.64108	0.0173649
ACX60_05780	ubiC	1.58797	3.00626	0.00296386		ACX60_07115	ACX60_07115	-1.63827	3.11293	0.00281374		ACX60_18600	feoB	1.8165	3.52225	0.00223809		ACX60_06095	ACX60_06095	2.11195	4.32277	0.00403019								ACX60_06915	ACX60_06915	2.22101	4.6622	0.00736125
ACX60_13260	nth	1.71859	3.29114	0.00296386		ACX60_03910	ACX60_03910	-1.63784	3.11199	0.000109842		ACX60_09700	asbA	1.86243	3.63619	0.0023002		ACX60_02785	ACX60_02785	3.54513	11.6732	0.00437929								ACX60_04525	purN	2.22382	4.6713	0.0223047
ACX60_12345	alaS	1.53734	2.90258	0.00301768		ACX60_17585	ACX60_17585	-1.63501	3.10591	0.00489914		ACX60_17495	ACX60_17495	1.73161	3.32099	0.00231421		ACX60_10520	ACX60_10520	4.15561	17.8222	0.00443652								ACX60_13155	lysE	2.22809	4.68513	0.00143057
ACX60_18100	ACX60_18100	1.70128	3.2519	0.00314992		ACX60_16635	ACX60_16635	-1.63183	3.09906	0.0273156		ACX60_00875	arsR	3.10457	8.60137	0.0023417		ACX60_16875	feoA	2.77002	6.82117	0.00448595								ACX60_17320	atpA	2.23468	4.7066	0.000186735
ACX60_05970	queF	1.54412	2.91627	0.00321157		ACX60_12335	hisZ	-1.63004	3.09521	0.000410647		ACX60_16630	yuiF	2.25223	4.76418	0.00238519		ACX60_02425	ACX60_02425	1.8625	3.63636	0.00456736								ACX60_14710	ACX60_14710	2.24066	4.72614	0.000326021
ACX60_13235	rlmH	2.05627	4.15911	0.0032846		ACX60_04815	tnsA	-1.62583	3.0862	0.0419727		ACX60_05605	yclN	5.53683	46.4249	0.00238519		ACX60_12155	benA	2.33236	5.03628	0.00458227								ACX60_18205	ACX60_18205	2.24115	4.72774	2.61444e-05
ACX60_02125	rpsC	1.83942	3.57866	0.00335093		ACX60_02585	yfiN	-1.62285	3.07984	0.040851		ACX60_01475	sbp	2.38097	5.20888	0.00239226		ACX60_06945	ACX60_06945	2.26251	4.79826	0.0047307								ACX60_17335	atpE	2.2425	4.73218	0.00393114
ACX60_05915	rpsB	1.97298	3.92577	0.00364071		ACX60_02975	ACX60_02975	-1.62223	3.0785	0.00399574		ACX60_06035	hisQ	5.66144	50.613	0.00242821		ACX60_11185	ACX60_11185	1.96195	3.89588	0.00479027								ACX60_10420	ACX60_10420	2.24816	4.75076	0.00283357
ACX60_06710	rpsF	1.66939	3.18079	0.0036525		ACX60_16285	cbpA	-1.61739	3.06821	0.000155056		ACX60_09365	fccB	2.84173	7.16879	0.00245594		ACX60_14490	ACX60_14490	1.59893	3.02919	0.00492428								ACX60_06505	csuE	2.27161	4.8286	0.00696464
ACX60_16000	infA	1.78152	3.43789	0.00381595		ACX60_10950	ACX60_10950	-1.61573	3.06466	0.044327		ACX60_04730	fcuA	3.11704	8.67608	0.00246501		ACX60_00185	ACX60_00185	1.60729	3.04679	0.00497845								ACX60_05860	ahcY	2.27473	4.83908	0.00113131
ACX60_03125	btuB	1.60792	3.04811	0.0039966		ACX60_15735	piuC	-1.61561	3.06441	0.0181495		ACX60_12415	ACX60_12415	5.87345	58.6253	0.00252947		ACX60_08410	pcaG	4.82934	28.43	0.00502387								ACX60_14025	rimI	2.2833	4.86791	0.00163605
ACX60_13690	pgaB	1.76398	3.39634	0.00404385		ACX60_02850	ACX60_02850	-1.61556	3.06431	0.000503498		ACX60_00215	ACX60_00215	5.65588	50.4184	0.00254281		ACX60_08430	quiA	2.94189	7.68419	0.005178								ACX60_10385	pgk	2.28456	4.87215	0.000356589
ACX60_15165	infC	1.65485	3.14891	0.00421019		ACX60_11570	MA20_05250	-1.61485	3.0628	0.013352		ACX60_01405	czcC	1.53898	2.9059	0.00256321		ACX60_12735	ACX60_12735	1.5767	2.98287	0.00535205								ACX60_17300	ACX60_17300	2.28469	4.87259	0.000125959
ACX60_14475	metG	1.61875	3.07109	0.00443006		ACX60_04540	hda	-1.61198	3.05672	0.0251739		ACX60_09005	ACX60_09005	2.96747	7.82161	0.00256321		ACX60_06960	ACX60_06960	1.76022	3.38749	0.00610296								ACX60_03540	ACX60_03540	2.30573	4.94418	0.000638653
ACX60_12665	ACX60_12665	1.9585	3.88659	0.00443273		ACX60_02325	ycgM	-1.60998	3.05247	0.0458601		ACX60_07685	ACX60_07685	5.85769	57.9885	0.0026073		ACX60_17150	IV02_05570	1.84971	3.60429	0.00623779								ACX60_01730	serA	2.32089	4.99642	0.0007204
ACX60_16165	hopJ	1.92701	3.80265	0.00492169		ACX60_17705	prpB	-1.60445	3.0408	0.00670553		ACX60_03085	ACX60_03085	1.87697	3.67304	0.00261377		ACX60_12430	ACX60_12430	1.595	3.02095	0.00664684								ACX60_12665	ACX60_12665	2.32677	5.01681	0.0018712
ACX60_11930	mdmC	1.97499	3.93126	0.00502373		ACX60_02340	rbn	-1.60205	3.03575	0.000861952		ACX60_10055	ACX60_10055	4.00376	16.0418	0.00261377		ACX60_06170	ACX60_06170	1.72818	3.3131	0.00701035								ACX60_02175	rplR	2.33409	5.04233	0.0130897
ACX60_08795	ACX60_08795	2.94152	7.68223	0.00508427		ACX60_00045	ACX60_00045	-1.60131	3.03419	0.00058448		ACX60_00435	ACX60_00435	4.53922	23.251	0.00261377		ACX60_08450	blh	1.56592	2.96066	0.0075946								ACX60_18520	ACX60_18520	2.34782	5.09055	1.94431e-05
ACX60_16555	lpxO	1.62165	3.07727	0.00515345		ACX60_18430	NA	-1.5997	3.0308	0.0272387		ACX60_17070	dapA2	1.70905	3.26946	0.0026466		ACX60_06965	rsuA	1.58389	2.99778	0.00762726								ACX60_18915	ACX60_18915	2.34972	5.09726	0.000189804
ACX60_13845	emrA	1.76229	3.39237	0.00526492		ACX60_04190	cpdA	-1.59898	3.0293	0.0480729		ACX60_07455	marMP	3.05035	8.28411	0.0026466		ACX60_11445	paaH	2.25191	4.76312	0.00791792								ACX60_16675	rplA	2.35639	5.12087	0.00258414
ACX60_03970	sdhD	1.65718	3.154	0.00534347		ACX60_13830	ACX60_13830	-1.59728	3.02573	0.0152677		ACX60_09325	yidP	3.1095	8.63086	0.0026466		ACX60_13580	def2	2.2939	4.90381	0.00791792								ACX60_01475	sbp	2.35745	5.12463	0.0143251
ACX60_15940	uup	1.50828	2.84471	0.00540154		ACX60_11130	cjaA	-1.59539	3.02176	0.0363548		ACX60_07625	ACX60_07625	3.88185	14.7419	0.0026466		ACX60_14160	ACX60_07500	2.12071	4.34909	0.00801499								ACX60_03935	ACX60_03935	2.35924	5.131	0.00197199
ACX60_08335	ACX60_08335	1.68857	3.22337	0.00542642		ACX60_09905	hbpA	-1.59482	3.02056	0.00142196		ACX60_08875	ACX60_08875	3.89294	14.8556	0.0026466		ACX60_00055	erpA	1.52351	2.87489	0.00813818								ACX60_09380	yneE	2.36925	5.16671	0.0172145
ACX60_06935	araJ	1.58104	2.99185	0.00565714		ACX60_16380	mrpA	-1.59432	3.01953	9.70595e-05		ACX60_09910	ACX60_09910	2.39115	5.24574	0.00265991		ACX60_14480	ACX60_14480	3.63178	12.3958	0.00825916								ACX60_05445	rpmE	2.37277	5.17933	0.0139984
ACX60_08955	metF	2.51394	5.71179	0.00566098		ACX60_01240	aqpZ	-1.59213	3.01493	0.017957		ACX60_08380	pcaF	3.36794	10.3241	0.00270511		ACX60_08670	cueR	1.82673	3.54731	0.00881088								ACX60_08795	ACX60_08795	2.37568	5.18979	0.0312045
ACX60_02120	rplV	2.19724	4.586	0.0057228		ACX60_14270	ygaU	-1.58942	3.00929	0.00487615		ACX60_17970	mae1	3.64839	12.5394	0.00270511		ACX60_13480	nfuA	1.71398	3.28064	0.00913207								ACX60_02220	rpoA	2.37614	5.19146	0.000162903
ACX60_17330	atpF	1.53519	2.89827	0.00574002		ACX60_18360	ACX60_18360	-1.58295	2.99581	0.0101468		ACX60_06515	proP	1.5897	3.00987	0.0027257		ACX60_08680	ACX60_08680	4.19016	18.2542	0.00941304								ACX60_02180	rpsE	2.38462	5.22206	0.0109129
ACX60_14230	ctc	1.54926	2.92668	0.00575337		ACX60_08075	fruA	-1.58256	2.99501	0.000498536		ACX60_15520	VP0886	1.78711	3.45124	0.00273057		ACX60_11920	fdxA	1.50206	2.83247	0.00952039								ACX60_14415	dusC	2.38574	5.22613	0.0196632
ACX60_07885	ACX60_07885	1.64637	3.13046	0.00588887		ACX60_17895	tetR7	-1.5813	2.9924	0.000345388		ACX60_12165	pyrK	4.81095	28.0699	0.00273057		ACX60_14195	lolB	1.62714	3.089	0.00971297								ACX60_08225	ACX60_08225	2.38675	5.2298	3.59388e-05
ACX60_15895	ACX60_15895	2.35704	5.12317	0.00640914		ACX60_11565	queH	-1.57622	2.98187	0.00950597		ACX60_18355	ACX60_18355	2.26902	4.81995	0.00273131		ACX60_02780	ACX60_02780	1.56496	2.9587	0.0101363								ACX60_16680	rplK	2.39005	5.24177	0.00292754
ACX60_10650	plsC2	2.24069	4.72621	0.0069808		ACX60_15995	ACX60_15995	-1.57522	2.97981	0.000302056		ACX60_18780	xerC	1.99571	3.98812	0.00275907		ACX60_01175	ACX60_01175	1.79025	3.45875	0.010789								ACX60_06480	csuA/B	2.39463	5.25842	0.000239253
ACX60_00740	pyrE	1.55311	2.93448	0.0070034		ACX60_01415	czcA	-1.57309	2.97542	0.00667541		ACX60_09320	ACX60_09320	2.09164	4.26232	0.00277837		ACX60_13495	pkn1	2.50728	5.68545	0.0110436								ACX60_10650	plsC2	2.43397	5.40379	0.00982203
ACX60_08495	ACX60_08495	2.10069	4.28916	0.0070034		ACX60_11360	alr	-1.56884	2.96666	0.00216548		ACX60_18415	ACX60_18415	2.15649	4.45827	0.00279721		ACX60_07180	ACX60_07180	4.09004	17.0304	0.0111548								ACX60_05915	rpsB	2.43622	5.41222	0.000642084
ACX60_14320	rluB	1.53535	2.89858	0.00738291		ACX60_04630	dgt	-1.56655	2.96196	0.000920689		ACX60_15325	ygdL	2.32408	5.00748	0.00280459		ACX60_16160	rpmE2	5.00191	32.0424	0.0126972								ACX60_01815	gdhA	2.43907	5.42293	0.000114334
ACX60_10240	rpsA	1.71457	3.28199	0.00738291		ACX60_04425	etfA	-1.55937	2.94724	0.00155565		ACX60_18510	ACX60_18510	4.05727	16.648	0.00280459		ACX60_08675	ACX60_08675	2.16729	4.49179	0.0127137								ACX60_15865	rpmB	2.43972	5.42536	1.86549e-05
ACX60_15700	fumA	1.54841	2.92494	0.00767358		ACX60_11210	ACX60_11210	-1.55776	2.94395	0.0196601		ACX60_12350	ACX60_12350	4.05877	16.6652	0.00282725		ACX60_06860	kdpA	2.10112	4.29042	0.0127955								ACX60_15145	rpmI	2.44569	5.44787	0.00789193
ACX60_16665	rplL	1.89666	3.72351	0.00768674		ACX60_03915	ACX60_03915	-1.55617	2.94073	0.00124018		ACX60_12410	ACX60_12410	2.77271	6.83389	0.00285077		ACX60_01430	ACX60_01430	1.57534	2.98006	0.0134246								ACX60_14485	ACX60_14485	2.44794	5.45635	0.032816
ACX60_00245	mutY	1.73088	3.3193	0.00852446		ACX60_18450	ACX60_18450	-1.54737	2.92283	0.00240842		ACX60_18420	icmE	1.87401	3.66551	0.00285849		ACX60_10330	exbD2	2.57188	5.94583	0.0134425								ACX60_03860	rplU	2.44803	5.45672	0.000273742
ACX60_01995	mlaC	2.17603	4.5191	0.00872658		ACX60_06950	metR	-1.5412	2.91036	0.00245375		ACX60_12580	ydiP	4.72325	26.4144	0.00288699		ACX60_08425	oprB	3.56349	11.8227	0.0134425								ACX60_06500	csuD	2.45138	5.46938	0.000480678
ACX60_08770	ACX60_08770	1.70123	3.25177	0.00894991		ACX60_00050	adeT	-1.5384	2.90473	0.0323297		ACX60_13490	atsA	2.02836	4.07941	0.00288813		ACX60_11860	nolA	1.63771	3.11172	0.0135463								ACX60_02125	rpsC	2.45263	5.47413	0.000293056
ACX60_05225	ACX60_05225	1.63189	3.09918	0.00925236		ACX60_09900	ACX60_09900	-1.53358	2.89504	0.000257004		ACX60_01545	pilQ	2.44696	5.45266	0.00296137		ACX60_05090	cicA	1.93078	3.81261	0.0140459								ACX60_05920	tsf	2.46335	5.51494	0.00269186
ACX60_02115	rpsS	2.29156	4.89584	0.00965835		ACX60_01070	ACX60_01070	-1.53143	2.89072	0.0027486		ACX60_15635	ACX60_15635	2.47584	5.56292	0.00299953		ACX60_08545	ACX60_08545	1.53053	2.88892	0.0156737								ACX60_18210	ACX60_18210	2.49462	5.63578	0.00867694
ACX60_09435	aroC	1.50574	2.83971	0.0104244		ACX60_13585	cjaB	-1.52931	2.88647	0.0070966		ACX60_09595	lpxB	2.36397	5.14786	0.0030331		ACX60_05605	yclN	4.32184	19.9988	0.0157685								ACX60_00390	proY	2.49538	5.63878	0.000136836
ACX60_15325	ygdL	1.9833	3.95395	0.0106969		ACX60_16915	pilR	-1.52898	2.88581	0.00150182		ACX60_00220	ACX60_00220	1.99045	3.97362	0.00303392		ACX60_05035	ACX60_05035	1.77372	3.41935	0.0160244								ACX60_02120	rplV	2.51968	5.73455	0.00200418
ACX60_06480	csuA/B	1.5076	2.84336	0.0107877		ACX60_16255	gspG	-1.52657	2.881	0.00208037		ACX60_18740	ACX60_18740	2.33824	5.05687	0.00303392		ACX60_13160	ACX60_14860	2.14497	4.42285	0.0174432								ACX60_03305	rtcB	2.52283	5.74709	4.12834e-05
ACX60_02215	rpsD	1.82513	3.54338	0.0116245		ACX60_12245	yliJ	-1.52355	2.87498	0.0249359		ACX60_06115	mutT	3.03429	8.19245	0.00303392		ACX60_15635	ACX60_15635	1.97759	3.93833	0.0185971								ACX60_01690	rplS	2.5441	5.83245	0.00164141
ACX60_02150	rplX	1.6501	3.13855	0.0117695		ACX60_02080	metC	-1.51911	2.86613	0.0140184		ACX60_18210	ACX60_18210	2.64476	6.25391	0.00308753		ACX60_08625	IV02_10655	3.61883	12.285	0.0190677								ACX60_09130	acrF	2.5474	5.84581	0.000476577
ACX60_02140	rpsQ	2.2145	4.64121	0.0117695		ACX60_05040	ACX60_05040	-1.51657	2.8611	0.000507232		ACX60_12445	ACX60_12445	4.98219	31.6075	0.00309287		ACX60_08550	tynA	1.55198	2.9322	0.0195035								ACX60_09325	yidP	2.553	5.86853	0.037791
ACX60_06330	rpsU	1.66034	3.16092	0.0120616		ACX60_02935	intB	-1.51116	2.8504	0.0333074		ACX60_10875	arsC	4.39249	21.0025	0.00310881		ACX60_06135	yeaC	1.55268	2.93362	0.0202634								ACX60_18350	ftsA	2.5687	5.93274	0.000117989
ACX60_06635	purH	1.74814	3.35925	0.0123919		ACX60_10640	ACX60_10640	-1.50792	2.84401	0.0439535		ACX60_16550	ACX60_16550	2.17086	4.50291	0.00316236		ACX60_08180	ACX60_08180	1.53546	2.8988	0.0203661								ACX60_02215	rpsD	2.56891	5.93361	0.000843935
ACX60_07565	ACX60_07565	2.29117	4.89453	0.0124483		ACX60_01445	ACX60_01445	-1.50621	2.84062	0.00240842		ACX60_02885	radC	3.11804	8.68209	0.00316236		ACX60_04280	yjhX	3.15962	8.93592	0.021022								ACX60_10415	sstT	2.57593	5.96255	2.93857e-05
ACX60_02225	rplQ	1.64867	3.13544	0.0125188		ACX60_18930	NA	-1.50584	2.83989	0.00885725		ACX60_11500	aldH	3.59782	12.1075	0.00321459		ACX60_17540	echA9	1.80718	3.49957	0.0214887								ACX60_02210	rpsK	2.57844	5.97292	0.00156248
ACX60_01730	serA	1.61029	3.05314	0.0125953		ACX60_16840	cpdA	-1.50485	2.83795	0.00376905		ACX60_12515	terL	4.40016	21.1145	0.00325107		ACX60_13940	olsB	1.51487	2.85772	0.0227167								ACX60_00385	hutH	2.58069	5.98225	6.29419e-06
ACX60_02240	sdhE	1.71816	3.29017	0.0125953		ACX60_17860	nadC	1.50089	2.83017	0.0278152		ACX60_12505	ACX60_12505	4.49951	22.6198	0.00328833		ACX60_12475	ACX60_12475	3.20514	9.22238	0.0240982								ACX60_03320	xanP	2.58557	6.00253	0.000625586
ACX60_15145	rpmI	2.26142	4.79462	0.0125953		ACX60_17280	nepI	1.50125	2.83087	0.0466641		ACX60_10600	ACX60_10600	3.99322	15.925	0.00330373		ACX60_13650	ACX60_13650	4.07332	16.8341	0.0252725								ACX60_02135	rpmC	2.59276	6.03253	0.0197469
ACX60_14970	yrbA	1.68322	3.21144	0.0139025		ACX60_06210	ACX60_06210	1.50673	2.84165	0.039478		ACX60_11170	lrp	6.23206	75.1686	0.00333559		ACX60_04580	ACX60_04580	2.55782	5.88818	0.0263745								ACX60_17085	ppa	2.59486	6.04132	0.00179808
ACX60_02185	rpmD	2.8204	7.06359	0.0139025		ACX60_13960	rep	1.50685	2.84189	0.000679329		ACX60_17420	ant	2.4975	5.64706	0.00333861		ACX60_06685	MA20_32445	2.49133	5.62295	0.0265764								ACX60_02225	rplQ	2.60226	6.07238	0.000336364
ACX60_16700	tuf	1.70786	3.26677	0.0141398		ACX60_16870	feoB	1.51191	2.85188	0.000742639		ACX60_12885	ACX60_12885	5.1861	36.406	0.00333891		ACX60_17525	ACX60_17525	4.67669	25.5755	0.0271202								ACX60_06975	ACX60_06975	2.6023	6.07256	0.00393235
ACX60_11565	queH	1.56768	2.96429	0.0143594		ACX60_07865	ACX60_07865	1.51292	2.85387	0.170092		ACX60_01160	ACX60_01160	2.12468	4.36106	0.00338919		ACX60_09695	ACX60_09695	3.61855	12.2826	0.0274489								ACX60_02140	rpsQ	2.61259	6.11601	0.00395837
ACX60_10905	pucI	1.9664	3.90791	0.0149112		ACX60_04935	mucD	1.51576	2.8595	0.00106731		ACX60_15790	phoX	3.10453	8.60115	0.00338919		ACX60_13685	pgaC	1.94718	3.85619	0.0279857								ACX60_07250	ydcO	2.64013	6.23389	0.000572066
ACX60_02135	rpmC	2.61213	6.11407	0.0155596		ACX60_04080	carB	1.51637	2.8607	0.00321834		ACX60_07865	ACX60_07865	3.32961	10.0534	0.00344309		ACX60_14165	yfiH	2.48186	5.58618	0.0285669								ACX60_09620	ACX60_09620	2.64601	6.25934	0.000326764
ACX60_02105	rplW	1.91241	3.76438	0.0157986		ACX60_03270	MA20_18215	1.52164	2.87117	0.0807447		ACX60_11695	ACX60_11695	1.82009	3.53102	0.0034431		ACX60_18070	ACX60_18070	3.75844	13.5332	0.0291456								ACX60_18195	rpmH	2.64898	6.27226	0.0192405
ACX60_08205	ACX60_08205	1.85388	3.6147	0.0166316		ACX60_15765	ACX60_15765	1.5217	2.87129	0.0190229		ACX60_09970	ACX60_09970	3.28085	9.71927	0.0034431		ACX60_09965	ACX60_09965	1.65339	3.14572	0.0302162								ACX60_14240	panD	2.65069	6.27966	0.00103473
ACX60_04525	purN	2.10333	4.29701	0.0167513		ACX60_01995	mlaC	1.52344	2.87476	0.0448786		ACX60_08620	IV02_10650	4.18756	18.2213	0.0034431		ACX60_16825	ACX60_16825	1.59062	3.0118	0.0304551								ACX60_16700	tuf	2.65205	6.28559	0.000456598
ACX60_03935	ACX60_03935	1.63661	3.10934	0.0171184		ACX60_07575	ACX60_07575	1.52704	2.88194	0.173835		ACX60_09435	aroC	1.71827	3.29043	0.003459		ACX60_11190	NA	2.64378	6.24968	0.0322898								ACX60_12015	ACX60_12015	2.66012	6.32087	0.000329431
ACX60_07920	frr	1.75984	3.38661	0.0181042		ACX60_05065	gapA	1.53556	2.89901	0.0228501		ACX60_17060	gabR_1	3.45628	10.976	0.003459		ACX60_14470	ACX60_14470	1.59271	3.01615	0.0329021								ACX60_18340	ACX60_18340	2.66427	6.33907	8.9688e-05
ACX60_01285	puuR_1	2.10066	4.28906	0.0183942		ACX60_00205	dkgB	1.53956	2.90706	0.00185612		ACX60_18455	ACX60_18455	2.31086	4.9618	0.00348116		ACX60_10055	ACX60_10055	2.81912	7.05734	0.0329368								ACX60_00965	ACX60_00965	2.67244	6.37506	0.000292108
ACX60_01425	ACX60_01425	1.52863	2.88512	0.0188518		ACX60_12665	ACX60_12665	1.54042	2.90879	0.0162366		ACX60_07620	ACX60_07620	3.77956	13.7329	0.0035072		ACX60_07835	ACX60_07835	2.0679	4.19276	0.0330742								ACX60_02095	rplC	2.68629	6.43655	0.00789193
ACX60_12120	ACX60_12120	1.51121	2.85048	0.0188927		ACX60_17065	fucA_3	1.54102	2.91001	0.105		ACX60_09350	ACX60_09350	2.9094	7.51307	0.003567		ACX60_17435	ACX60_17435	3.34845	10.1856	0.0340822								ACX60_03510	sanA	2.68725	6.44086	0.000140586
ACX60_05690	hemE	1.56661	2.96207	0.0190771		ACX60_12945	aroP	1.54934	2.92683	0.00312103		ACX60_00500	katB	2.18145	4.53611	0.00356741		ACX60_04975	ACX60_04975	1.89487	3.71888	0.0343468								ACX60_06495	csuC	2.6916	6.46027	0.000121799
ACX60_05260	rluA	1.5623	2.95325	0.01942		ACX60_12675	add	1.55065	2.92949	0.000126355		ACX60_18690	ACX60_18690	3.29013	9.78201	0.00360926		ACX60_00260	ACX60_00260	1.70932	3.27007	0.0344652								ACX60_08110	brnQ	2.69594	6.47977	0.00499972
ACX60_08110	brnQ	2.16179	4.4747	0.0198603		ACX60_04735	ACX60_04735	1.551	2.93021	0.15264		ACX60_12520	ACX60_12520	6.67716	102.336	0.00365739		ACX60_06420	ACX60_06420	2.48663	5.60467	0.0366563								ACX60_18355	ACX60_18355	2.72697	6.62066	0.000580057
ACX60_15620	ndk	1.99944	3.99845	0.0205336		ACX60_15525	lola3	1.55599	2.94035	0.00270323		ACX60_08370	pcaI	5.52826	46.1499	0.00368797		ACX60_01100	ynfL	1.90043	3.73324	0.0373414								ACX60_10585	mrkC	2.73634	6.6638	0.00162517
ACX60_04610	ybgC	1.72326	3.30181	0.0207979		ACX60_08145	ACX60_08145	1.5637	2.9561	0.00721785		ACX60_11375	azoR	1.89956	3.73101	0.00375703		ACX60_07855	ACX60_07855	2.37308	5.18044	0.0377635								ACX60_14200	ispE	2.73889	6.67557	4.97373e-05
ACX60_07035	guaA_1	1.75429	3.3736	0.0213337		ACX60_09270	ACX60_09270	1.57379	2.97686	0.0454993		ACX60_18495	ACX60_18495	2.57619	5.96363	0.00387627		ACX60_18690	ACX60_18690	2.36656	5.1571	0.0383323								ACX60_04895	cysT	2.74268	6.69312	0.00461785
ACX60_05980	yadG	1.74979	3.3631	0.0216373		ACX60_11375	azoR	1.58049	2.99072	0.0114629		ACX60_18375	ACX60_18375	1.98569	3.96051	0.00391305		ACX60_05110	ACX60_05110	2.5067	5.68319	0.0399882								ACX60_18460	ftsK	2.75039	6.729	6.76202e-05
ACX60_02210	rpsK	1.76379	3.39588	0.0216373		ACX60_07920	frr	1.58211	2.99407	0.0233304		ACX60_07570	ACX60_07570	2.85176	7.21878	0.00391305		ACX60_09370	ACX60_09370	2.08679	4.24802	0.0410643								ACX60_06710	rpsF	2.77248	6.83284	3.13453e-05
ACX60_15140	rplT	1.779	3.43188	0.0228774		ACX60_01730	serA	1.58635	3.00288	0.00881661		ACX60_18860	ACX60_18860	4.52664	23.0492	0.00391305		ACX60_02795	cusA	1.51507	2.85813	0.0417622								ACX60_02115	rpsS	2.78479	6.89136	0.00232533
ACX60_17305	atpC	1.50322	2.83475	0.0235456		ACX60_02030	yeeZ	1.5915	3.01363	0.00115438		ACX60_17185	ACX60_17185	2.65468	6.29707	0.00391813		A1S_3469	A1S_3469	2.24915	4.75403	0.0422785								ACX60_18985	ACX60_18985	2.79356	6.9334	4.97373e-05
ACX60_17085	ppa	1.75985	3.38664	0.0248392		ACX60_16555	lpxO	1.59155	3.01373	0.0035991		ACX60_09125	acrE	3.65636	12.6088	0.00400348		ACX60_09410	acoA	1.922	3.78949	0.0424211								ACX60_14045	fusA	2.80924	7.00917	0.00164141
ACX60_16685	nusG	1.65238	3.14353	0.025475		ACX60_07625	ACX60_07625	1.59342	3.01763	0.210593		ACX60_00605	yjbJ	1.97448	3.92986	0.00401146		ACX60_00580	dsbB	2.53593	5.79949	0.044356								ACX60_15960	gltT	2.81859	7.05473	7.27391e-07
ACX60_15310	dusA	1.60838	3.0491	0.0267106		ACX60_15705	ACX60_15705	1.59604	3.02313	0.0717253		ACX60_18225	ACX60_18225	3.69768	12.9752	0.00403744		ACX60_15850	purU	2.25933	4.78769	0.0446001								ACX60_15780	tatC	2.8188	7.05575	0.0156556
ACX60_10585	mrkC	1.63646	3.10902	0.0267931		ACX60_13945	argB	1.59838	3.02803	0.000353496		ACX60_05705	ACX60_05705	3.523	11.4955	0.00407304		ACX60_08530	ACX60_08530	2.085	4.24274	0.0449399								ACX60_06485	csuA	2.8356	7.1384	0.000162886
ACX60_02520	rpsI	1.62674	3.08814	0.0293632		ACX60_07700	umuC	1.59842	3.02812	0.313604		ACX60_01880	ACX60_01880	2.50573	5.67937	0.00410849		ACX60_00750	ACX60_00750	1.62499	3.0844	0.0457718								ACX60_06475	ACX60_06475	2.87406	7.33127	0.0012764
ACX60_03300	ACX60_03300	2.55639	5.88232	0.0295893		ACX60_00575	gshA	1.60216	3.03597	0.00890247		ACX60_09000	ACX60_09000	3.35402	10.2249	0.00410849		ACX60_14850	copB	3.1731	9.01981	0.045815								ACX60_18345	ACX60_18345	2.89939	7.46111	0.000190119
ACX60_05865	ACX60_05865	1.8764	3.67157	0.0302638		ACX60_05465	efp	1.60372	3.03927	0.00663805		ACX60_04905	cysP	1.77584	3.42438	0.00412916		ACX60_03925	ybeD	2.0976	4.27997	0.0467932								ACX60_18330	ACX60_18330	2.91274	7.53045	1.19198e-06
ACX60_16680	rplK	1.66725	3.17609	0.0311773		ACX60_09065	ACX60_09065	1.6063	3.04471	0.00112034		ACX60_04675	ACX60_04675	2.34559	5.0827	0.00412916		ACX60_00990	MA20_23345	1.90037	3.73308	0.0477678								ACX60_18440	ACX60_18440	2.9242	7.59052	0.015642
ACX60_04975	ACX60_04975	1.89716	3.72478	0.0316434		ACX60_12260	pyrC	1.61196	3.05667	0.00420404		ACX60_03065	yohN	2.94969	7.72581	0.00412916		ACX60_01650	pilW1	1.50831	2.84477	0.0489052								ACX60_02110	rplB	2.92527	7.59615	0.000724643
ACX60_02110	rplB	1.68574	3.21704	0.0348317		ACX60_05370	purB	1.61249	3.0578	0.00384952		ACX60_16180	ACX60_16180	2.40485	5.2958	0.00416553														ACX60_00395	hutI	2.93755	7.66108	5.33665e-05
ACX60_05405	ACX60_05405	1.62412	3.08255	0.0353975		ACX60_05740	trpC	1.61728	3.06797	0.000927631		ACX60_14415	dusC	2.57697	5.96686	0.00421381														ACX60_18545	ACX60_18545	2.93886	7.66806	5.26201e-06
ACX60_18125	ACX60_18125	1.77361	3.41908	0.0412547		ACX60_16690	secE	1.62081	3.07548	0.000668841		ACX60_02695	ACX60_02695	3.58099	11.967	0.00421381														ACX60_18410	ACX60_18410	2.95274	7.7422	6.47266e-06
ACX60_07685	ACX60_07685	3.98184	15.7998	0.0417348		ACX60_05715	folE	1.6214	3.07673	0.0717253		ACX60_12850	gudD	3.64373	12.4989	0.00421381														ACX60_00265	ACX60_00265	2.98039	7.89197	0.00734354
ACX60_15105	ACX60_15105	1.87831	3.67645	0.0417901		ACX60_04115	folP	1.62346	3.08112	0.0725706		ACX60_04290	ACX60_04290	2.58329	5.99304	0.00424383														ACX60_02105	rplW	3.01553	8.0866	0.000488038
ACX60_18130	ygiC	1.63531	3.10655	0.0419177		ACX60_13855	hemB	1.62739	3.08954	0.00174517		ACX60_08020	kynU	3.03445	8.19333	0.00424383														ACX60_02885	radC	3.01879	8.10486	0.0289925
ACX60_14225	prs	1.50366	2.83562	0.0434145		ACX60_13955	dut	1.63101	3.09729	0.0241262		ACX60_04680	ACX60_04680	1.94608	3.85327	0.00436169														ACX60_11245	ACX60_11245	3.04691	8.26441	0.00148417
ACX60_06810	prmC	1.59627	3.0236	0.0434145		ACX60_04100	yhbY	1.63119	3.09768	0.00843817		ACX60_04070	acnR	3.37387	10.3666	0.00436169														ACX60_02185	rpmD	3.08396	8.47939	0.0169066
ACX60_02160	rpsN	1.66789	3.1775	0.0434145		ACX60_06640	fis	1.63147	3.09828	0.0418425		ACX60_18935	ACX60_18935	2.01821	4.0508	0.00441346														ACX60_02200	rpmJ	3.12634	8.73216	0.0135759
ACX60_04985	pdxJ	1.94338	3.84604	0.0462199		ACX60_05310	ddc	1.6367	3.10953	0.000637734		ACX60_10130	dnaC	3.9505	15.4604	0.00445498														ACX60_02100	rplD	3.15916	8.93308	0.00131311
ACX60_18740	ACX60_18740	1.5492	2.92655	0.0472878		ACX60_15475	secB	1.63704	3.11026	0.000218047		ACX60_16120	ACX60_16120	3.7733	13.6734	0.00452241														ACX60_12010	ACX60_12010	3.17228	9.01469	0.00951643
ACX60_16180	ACX60_16180	1.66281	3.16633	0.0479174		ACX60_14045	fusA	1.63806	3.11247	0.0368251		ACX60_09955	ACX60_09955	6.99782	127.807	0.00454438														ACX60_11145	papP	3.27573	9.68482	0.0490402
ACX60_05905	ompW	1.80234	3.48786	0.0499247		ACX60_04500	lolD	1.64162	3.12015	0.0290833		ACX60_10650	plsC2	2.34136	5.06779	0.0045534														ACX60_00400	hutG	3.28835	9.76994	9.38283e-05
						ACX60_09800	hscB	1.647	3.13181	0.000111189		ACX60_08090	ACX60_08090	2.36236	5.14212	0.0045534														ACX60_18075	ACX60_18075	3.34721	10.1768	0.00027608
						ACX60_14535	fpr	1.65275	3.14433	0.00884545		ACX60_17280	nepI	2.24729	4.74789	0.00471767														ACX60_10580	yehC	3.35515	10.233	0.00774288
						ACX60_02195	secY	1.65602	3.15146	0.00652014		ACX60_11770	ybdR	4.36316	20.5799	0.00471767														ACX60_18425	ACX60_18425	3.40283	10.5768	7.80521e-05
						ACX60_14230	ctc	1.65882	3.15758	0.00200914		ACX60_17640	ACX60_17640	3.55034	11.7155	0.00480627														ACX60_09520	ACX60_09520	3.43234	10.7954	0.0243847
						ACX60_02095	rplC	1.6636	3.16806	0.0670869		ACX60_01020	ACX60_01020	5.55463	47.0015	0.00480627														ACX60_18450	ACX60_18450	3.4395	10.849	1.19198e-06
						ACX60_04120	ACX60_04120	1.66508	3.17131	0.135385		ACX60_03660	ACX60_03660	2.70368	6.5146	0.00496932														ACX60_04120	ACX60_04120	3.46598	11.0501	0.0135759
						ACX60_15800	lgt	1.66861	3.17908	0.0172375		ACX60_04690	entE	3.15176	8.88739	0.0050269														ACX60_18360	ACX60_18360	3.47035	11.0836	1.09246e-05
						ACX60_13250	gdhA	1.67686	3.19732	0.000737395		ACX60_11060	ywbG	3.75268	13.4793	0.00511433														ACX60_18335	ACX60_18335	3.47389	11.1108	2.51464e-05
						ACX60_15780	tatC	1.67956	3.20329	0.0565892		ACX60_12765	vanK	4.52129	22.9638	0.00511977														ACX60_18885	ACX60_18885	3.49906	11.3064	0.00406436
						ACX60_09135	uvrA2	1.68004	3.20437	0.00295181		ACX60_08980	iaaH	4.04489	16.5056	0.00516746														ACX60_09125	acrE	3.51719	11.4493	0.00736125
						ACX60_10870	arsR	1.68947	3.22539	0.237192		ACX60_05675	basI	4.16105	17.8896	0.00522593														ACX60_17935	ssuA	3.53194	11.567	0.000299474
						ACX60_15905	ACX60_15905	1.69346	3.23431	0.00481726		ACX60_09425	pqqC2	1.54503	2.9181	0.00528482														ACX60_03300	ACX60_03300	3.54102	11.64	0.0186282
						ACX60_03950	yceA	1.69376	3.23498	0.00164556		ACX60_03785	ACX60_03785	1.66735	3.17631	0.00543421														ACX60_18455	ACX60_18455	3.58309	11.9845	0.000122634
						ACX60_06335	tsaD	1.69389	3.23529	0.0977535		ACX60_17610	ACX60_17610	2.34506	5.08081	0.00547804														ACX60_00670	ACX60_00670	3.64438	12.5045	1.06859e-05
						ACX60_02780	ACX60_02780	1.69935	3.24754	0.00304294		ACX60_18885	ACX60_18885	2.55975	5.89608	0.00548901														ACX60_18420	icmE	3.74843	13.4397	4.93885e-06
						ACX60_10240	rpsA	1.69945	3.24777	0.00487591		ACX60_00615	ACX60_00615	4.06178	16.7001	0.00556908														ACX60_18540	ACX60_18540	3.80277	13.9556	6.47266e-06
						ACX60_14315	scpB	1.7047	3.25961	0.000943321		ACX60_07420	ACX60_07420	2.38406	5.22004	0.00560088														ACX60_14460	mtnN	3.81886	14.1121	1.82047e-05
						ACX60_06195	rtcB	1.70663	3.26397	0.0637544		ACX60_11160	ACX60_11160	3.72551	13.2279	0.00571615														ACX60_18415	ACX60_18415	3.85598	14.4799	1.77922e-05
						ACX60_17625	rluA	1.70765	3.26628	0.0186027		ACX60_12370	umuC	3.0812	8.46317	0.00590629														ACX60_04905	cysP	3.936	15.3057	2.20788e-05
						ACX60_09675	ACX60_09675	1.7118	3.27569	0.00162372		ACX60_11780	ACX60_11780	3.23581	9.42051	0.00600549														ACX60_01085	ACX60_01085	3.95669	15.5268	2.18073e-05
						ACX60_10650	plsC2	1.71243	3.27712	0.0287835		ACX60_11035	ACX60_11035	2.00182	4.00505	0.00618542														ACX60_18530	ACX60_18530	4.30788	19.8062	0.0313489
						ACX60_09730	ACX60_09730	1.71258	3.27746	0.00270138		ACX60_07575	ACX60_07575	3.08902	8.50921	0.00624021														ACX60_18370	ACX60_18370	4.34053	20.2596	1.85677e-05
						ACX60_09370	ACX60_09370	1.71449	3.28181	0.0731378		ACX60_13595	ACX60_13595	4.28319	19.4701	0.00624021														ACX60_18365	dotC	4.51454	22.8567	5.90444e-06
						ACX60_03265	cysI	1.71488	3.2827	9.79907e-05		ACX60_07535	ACX60_07535	2.47879	5.57431	0.00632413														ACX60_10575	ACX60_10575	4.77322	27.3454	4.37496e-06
						ACX60_01845	ACX60_01845	1.72892	3.31479	0.00655489		ACX60_15310	dusA	1.95794	3.88506	0.00651963														ACX60_07240	mgtA	4.83316	28.5053	1.86549e-05
						ACX60_05165	dacD	1.73985	3.34001	0.00138867		ACX60_13040	fadH	2.72219	6.59874	0.0065322														ACX60_18405	ACX60_18405	4.91354	30.1386	0.000360039
						ACX60_01630	gmk	1.7408	3.34221	0.00130704		ACX60_06010	ACX60_06010	2.76102	6.77874	0.0065572														ACX60_04890	cysW	4.99185	31.8198	0.0209348
						ACX60_04090	ACX60_04090	1.74172	3.34434	0.152707		ACX60_06875	ACX60_06875	2.24947	4.75509	0.00660498														ACX60_01875	ydfC	5.41208	42.5793	4.16826e-06
						ACX60_13335	ACX60_13335	1.74194	3.34484	0.114461		ACX60_08995	ACX60_08995	3.04252	8.23928	0.00660498														ACX60_04900	ACX60_04900	5.41624	42.7021	0.000478107
						ACX60_13260	nth	1.74568	3.35354	0.00154481		ACX60_08975	ACX60_08975	3.69698	12.9689	0.00660498
						ACX60_02190	rplO	1.7505	3.36476	0.00950319		ACX60_10905	pucI	2.16947	4.49858	0.0066831
						ACX60_12385	ACX60_12385	1.75138	3.3668	0.358637		ACX60_13520	metH	2.17168	4.50549	0.00668998
						ACX60_07210	ACX60_07210	1.75267	3.36982	0.209916		ACX60_12385	ACX60_12385	4.58255	23.9599	0.00675119
						ACX60_16545	uvrC	1.75372	3.37227	0.000216547		ACX60_13625	sauU	3.09356	8.53603	0.0067665
						ACX60_02090	rpsJ	1.75466	3.37446	0.00218451		ACX60_04135	phoD	3.0277	8.15509	0.00685426
						ACX60_18065	dnaK	1.75521	3.37577	0.00158019		ACX60_10850	ACX60_10850	3.32961	10.0534	0.00690712
						ACX60_11350	HA62_21480	1.7579	3.38204	0.0305838		ACX60_15845	ACX60_15845	1.53257	2.89302	0.00699115
						ACX60_03515	cysJ	1.75906	3.38478	0.000320225		ACX60_08680	ACX60_08680	4.22022	18.6386	0.00700702
						ACX60_00035	yheS	1.76103	3.3894	1.78727e-05		ACX60_04445	MA20_05865	2.98447	7.91434	0.00711251
						ACX60_06135	yeaC	1.76335	3.39486	0.00491641		ACX60_01690	rplS	1.93349	3.81978	0.00711637
						ACX60_15785	phoX	1.76383	3.39599	0.0285506		ACX60_15850	purU	2.9392	7.66985	0.00711637
						ACX60_13695	ytfC	1.77096	3.41281	0.0293813		ACX60_07615	ACX60_07615	3.226	9.35669	0.00715783
						ACX60_01255	hisF	1.77103	3.41297	0.000359018		ACX60_04155	prmA_2	2.37706	5.19477	0.00716766
						ACX60_15620	ndk	1.77277	3.41709	0.0276487		ACX60_18340	ACX60_18340	1.54523	2.9185	0.00718008
						ACX60_09810	fdx	1.7751	3.42262	0.145409		ACX60_16570	ACX60_16570	1.57344	2.97613	0.00718008
						ACX60_14150	coaD	1.78024	3.43482	0.000270693		ACX60_18165	czcD	2.7201	6.58916	0.00727514
						ACX60_14225	prs	1.78281	3.44095	0.0109986		ACX60_17270	ACX60_17270	1.5997	3.03081	0.00730007
						ACX60_15940	uup	1.78488	3.4459	0.000708914		ACX60_07155	ACX60_07155	4.51058	22.794	0.00738934
						ACX60_02155	rplE	1.78742	3.45197	0.00457324		ACX60_13705	dctA	3.58172	11.973	0.00751227
						ACX60_04095	ACX60_04095	1.78754	3.45226	0.0642593		ACX60_06865	kdpB	2.9707	7.83916	0.00754616
						ACX60_04605	tolQ	1.79405	3.46786	0.00087498		ACX60_18530	ACX60_18530	3.69205	12.9246	0.0075596
						ACX60_17740	manB	1.79452	3.469	0.000225668		ACX60_10945	ACX60_10945	2.81839	7.05377	0.00770937
						ACX60_03940	IV02_13620	1.79662	3.47405	0.000596791		ACX60_10385	pgk	1.51559	2.85915	0.00784739
						ACX60_04475	serC	1.80031	3.48295	0.00265555		ACX60_06830	acs-2	2.14543	4.42425	0.00784739
						ACX60_03050	phuR	1.80211	3.48729	0.000128466		ACX60_07765	nirD	3.06371	8.36122	0.00784739
						ACX60_06870	kdpC	1.80416	3.49226	0.0573361		ACX60_12790	mhpT	3.39991	10.5554	0.00784739
						ACX60_02925	queA	1.80571	3.496	0.000134093		ACX60_04660	entC	1.78668	3.4502	0.00785101
						ACX60_11185	ACX60_11185	1.80571	3.49602	0.00522543		ACX60_12170	ACX60_12170	4.7167	26.2947	0.00786306
						ACX60_15465	yibN	1.81034	3.50724	0.0116419		ACX60_09010	ACX60_09010	3.16929	8.99605	0.00789301
						ACX60_02180	rpsE	1.81105	3.50898	0.0327412		ACX60_13805	ACX60_13805	4.58659	24.0272	0.00789301
						ACX60_06095	ACX60_06095	1.8119	3.51103	0.00789297		ACX60_12545	ACX60_12545	4.56844	23.7267	0.00793141
						ACX60_02100	rplD	1.81342	3.51475	0.0316104		ACX60_06335	tsaD	2.80362	6.98192	0.0079825
						ACX60_17990	fkpB	1.81512	3.51888	0.000257004		ACX60_00060	dehH1_2	3.16329	8.95868	0.0079825
						ACX60_03320	xanP	1.81852	3.52719	0.00559171		ACX60_12035	ACX60_12035	3.52678	11.5256	0.00809393
						ACX60_05345	pstA	1.82235	3.53656	0.00623061		ACX60_08420	quiC	2.08896	4.25441	0.0081219
						ACX60_01450	mmuP	1.82254	3.53704	0.000159709		ACX60_12130	ACX60_12130	3.67636	12.7848	0.00813314
						ACX60_06120	hemY	1.82699	3.54795	0.000136353		ACX60_12485	ACX60_12485	4.06213	16.704	0.00818596
						ACX60_01020	ACX60_01020	1.82718	3.54844	0.45447		ACX60_14000	rhtC	2.78975	6.91508	0.0083149
						ACX60_14415	dusC	1.8274	3.54897	0.032032		ACX60_14360	ACX60_14360	2.46209	5.51016	0.00843858
						ACX60_14890	rsmJ	1.82971	3.55464	0.000320125		ACX60_18720	ACX60_18720	4.85769	28.9941	0.00846263
						ACX60_04180	pckG	1.82978	3.55484	0.00289342		ACX60_06860	kdpA	2.15626	4.45757	0.00846405
						ACX60_03675	uppP	1.83156	3.55923	0.00582587		ACX60_01285	puuR_1	2.29914	4.92164	0.00850011
						ACX60_02175	rplR	1.83562	3.56925	0.0298995		ACX60_07410	csx3	1.70031	3.2497	0.00861838
						ACX60_03925	ybeD	1.83855	3.5765	0.0595136		ACX60_12620	ACX60_12620	2.83865	7.1535	0.00861838
						ACX60_06155	besA	1.84165	3.5842	0.0426559		ACX60_17860	nadC	1.85083	3.60707	0.00864445
						ACX60_06260	ACX60_06260	1.84174	3.58443	0.0262313		ACX60_07630	ACX60_07630	4.54355	23.3209	0.00864445
						ACX60_02200	rpmJ	1.84429	3.59075	0.0883268		ACX60_07500	ACX60_07500	3.07598	8.43262	0.00865722
						ACX60_05975	yadH	1.84807	3.60019	0.0289312		ACX60_11095	pspE	2.4675	5.53085	0.00877005
						ACX60_06400	ACX60_06400	1.85256	3.6114	0.0129012		ACX60_05200	MA20_07835	1.65331	3.14554	0.00878959
						ACX60_07465	ACX60_07465	1.85292	3.6123	0.0720122		ACX60_10555	queG	1.58015	2.99	0.00891511
						ACX60_13230	lon	1.85368	3.61421	0.00200914		ACX60_02665	ACX60_02665	3.1692	8.9955	0.00894632
						ACX60_12370	umuC	1.85456	3.61642	0.0815686		ACX60_13635	todE	4.68666	25.7528	0.00898333
						ACX60_07510	ACX60_07510	1.86459	3.64164	0.310994		ACX60_17065	fucA_3	2.56166	5.90388	0.00907449
						ACX60_05400	ACX60_05400	1.87911	3.67847	0.00044747		ACX60_05900	narK	2.97841	7.88117	0.00956537
						ACX60_05970	queF	1.87937	3.67914	0.00028119		ACX60_05545	ACX60_05545	2.99275	7.95991	0.00956537
						ACX60_10520	ACX60_10520	1.8797	3.67999	0.19435		ACX60_00925	msuE	1.78952	3.45699	0.00957145
						ACX60_00845	guaB	1.88916	3.70418	0.000712236		ACX60_08375	pcaJ	4.35484	20.4615	0.00958768
						ACX60_06295	cvpA	1.89001	3.70637	0.00970585		ACX60_05110	ACX60_05110	3.0514	8.29018	0.00962226
						ACX60_00565	ACX60_00565	1.89307	3.71425	0.000795242		ACX60_04655	ACX60_04655	2.87484	7.33522	0.00963706
						ACX60_02355	ACX60_02355	1.89811	3.72724	9.81365e-06		ACX60_18890	ACX60_18890	2.37367	5.18257	0.00968799
						ACX60_00185	ACX60_00185	1.90011	3.73242	0.000561352		ACX60_14025	rimI	1.66417	3.16932	0.00973198
						ACX60_01685	trmD	1.90231	3.73812	0.000525221		ACX60_18660	stbC	1.63828	3.11295	0.00974725
						ACX60_08850	ACX60_08850	1.90936	3.75643	1.4396e-05		ACX60_10580	yehC	2.77487	6.84417	0.00974725
						ACX60_04685	ACX60_04685	1.9106	3.75966	0.00269233		ACX60_00870	prfB	1.89429	3.71739	0.00980369
						ACX60_04575	fbp	1.91289	3.76563	0.000315858		ACX60_18405	ACX60_18405	2.63981	6.23248	0.00980369
						ACX60_08370	pcaI	1.91297	3.76583	0.438237		ACX60_13840	emrB	2.77684	6.8535	0.00983947
						ACX60_18060	grpE	1.9157	3.77296	0.00522289		ACX60_00355	ACX60_00355	3.63077	12.3871	0.00998182
						ACX60_07170	ACX60_07170	1.91607	3.77393	0.000699015		ACX60_12860	garD	2.60988	6.10454	0.0101446
						ACX60_16875	feoA	1.91743	3.7775	0.0307615		ACX60_05530	ACX60_05530	3.09085	8.51998	0.0101446
						ACX60_02525	rplM	1.92403	3.79481	0.000297419		ACX60_01375	ACX60_01375	2.82205	7.07165	0.0102232
						ACX60_00245	mutY	1.92532	3.79822	0.00229669		ACX60_18910	ACX60_18910	3.13431	8.78055	0.010243
						ACX60_02150	rplX	1.92544	3.79853	0.00220312		ACX60_07375	ACX60_07375	2.03048	4.0854	0.0102487
						ACX60_14490	ACX60_14490	1.92997	3.81046	0.000459596		ACX60_11405	ACX60_11405	2.39168	5.24767	0.0102487
						ACX60_13130	yraP	1.93223	3.81645	0.000674126		ACX60_14780	ACX60_14780	2.37532	5.18852	0.0104081
						ACX60_00055	erpA	1.93489	3.82348	0.000524414		ACX60_08870	ilvD1	2.04496	4.12662	0.0104618
						ACX60_02215	rpsD	1.94088	3.83941	0.00459471		ACX60_12935	puuP	2.72788	6.6248	0.0105332
						ACX60_16685	nusG	1.94208	3.84258	0.00584883		ACX60_04980	recO	2.89091	7.41737	0.0105585
						ACX60_07195	ACX60_07195	1.95131	3.86726	0.0228501		ACX60_18645	ACX60_18645	3.86579	14.5787	0.0105754
						ACX60_05355	sohB	1.95324	3.87244	0.000367164		ACX60_07180	ACX60_07180	3.95596	15.519	0.0106529
						ACX60_15895	ACX60_15895	1.9537	3.87368	0.0156885		ACX60_01525	pilM	2.158	4.46295	0.0107561
						ACX60_12650	lysC	1.95431	3.8753	0.000525221		ACX60_12615	yjeP	2.68178	6.41647	0.0109551
						ACX60_11170	lrp	1.958	3.88522	0.468109		ACX60_01695	lip	3.29367	9.80601	0.0109551
						ACX60_02165	rpsH	1.95876	3.88727	0.0127592		ACX60_08825	ACX60_08825	3.52403	11.5037	0.0109551
						ACX60_04150	folD	1.96077	3.8927	0.00299867		ACX60_12455	ACX60_12455	5.4635	44.1244	0.0109551
						ACX60_14235	pth	1.96189	3.89571	0.000311725		ACX60_13425	ACX60_13425	3.47305	11.1043	0.0110719
						ACX60_15225	ACX60_15225	1.96283	3.89826	0.0217334		ACX60_17955	ssuB	3.11296	8.65154	0.0110816
						ACX60_14050	rpsG	1.96383	3.90096	0.00373293		ACX60_05225	ACX60_05225	1.51234	2.85271	0.0111141
						ACX60_05340	pstC	1.97028	3.91844	0.00299867		ACX60_08630	ACX60_08630	2.86725	7.29672	0.0111141
						ACX60_01085	ACX60_01085	1.97288	3.92552	0.00598875		ACX60_05555	moeA	2.31765	4.98521	0.011173
						ACX60_02170	rplF	1.98335	3.95411	0.0101739		ACX60_16580	ACX60_16580	2.66072	6.32351	0.0111797
						ACX60_06005	glyA	1.98373	3.95513	0.000388813		ACX60_15290	pntAA	1.58611	3.00239	0.0112416
						ACX60_02205	rpsM	1.9926	3.97953	0.000105125		ACX60_05590	bauF	1.63877	3.114	0.0115686
						ACX60_16960	ribE	1.99359	3.98226	7.98744e-05		ACX60_18700	arsC2	1.94155	3.84117	0.0115686
						ACX60_14055	ACX60_14055	2.0065	4.01806	0.00746394		ACX60_11100	srpH	3.33434	10.0864	0.0115834
						ACX60_02220	rpoA	2.00757	4.02104	0.000369273		ACX60_01055	ACX60_01055	2.08481	4.24219	0.0115891
						ACX60_17435	ACX60_17435	2.00775	4.02153	0.208181		ACX60_06310	ACX60_06310	1.86556	3.64409	0.0116578
						ACX60_07530	ACX60_07530	2.00912	4.02536	0.127133		ACX60_01145	ydeP5	3.61624	12.263	0.0116637
						ACX60_02160	rpsN	2.00985	4.0274	0.00993291		ACX60_07465	ACX60_07465	2.6533	6.29104	0.0116668
						ACX60_02110	rplB	2.01522	4.04242	0.00779247		ACX60_12750	ACX60_12750	4.54852	23.4013	0.0116668
						ACX60_04525	purN	2.02306	4.06445	0.0145901		ACX60_08515	ACX60_08515	3.22335	9.33954	0.011752
						ACX60_08180	ACX60_08180	2.02662	4.07448	0.00134817		ACX60_17945	ssuD	2.47962	5.57751	0.0117588
						ACX60_04530	purM	2.02868	4.08033	0.000795242		ACX60_08505	ACX60_08505	3.02685	8.15027	0.0118008
						ACX60_10380	ACX60_10380	2.03002	4.08409	0.00560042		ACX60_01905	tetA	3.90418	14.9718	0.0118008
						ACX60_07570	ACX60_07570	2.03679	4.1033	0.0296186		ACX60_11400	ACX60_11400	3.24773	9.4987	0.0118173
						ACX60_04220	acrB	2.03741	4.10508	4.01183e-05		ACX60_05865	ACX60_05865	2.13196	4.38313	0.0118495
						ACX60_15310	dusA	2.03752	4.1054	0.00348076		ACX60_16170	crcB	3.15284	8.89407	0.0121525
						ACX60_15960	gltT	2.04681	4.13191	1.01278e-05		ACX60_07360	ACX60_07360	2.5067	5.68319	0.0122081
						ACX60_15770	tatA	2.05138	4.14503	0.0389116		ACX60_08385	pcaB	2.5999	6.06245	0.0122197
						ACX60_04155	prmA_2	2.05288	4.14933	0.0152677		ACX60_08540	C1-hpah	2.96073	7.7852	0.0122373
						ACX60_18160	dsbC	2.0558	4.15773	0.0387694		ACX60_11495	yveA	2.70988	6.54266	0.0123139
						ACX60_03540	ACX60_03540	2.05752	4.1627	0.000806812		ACX60_10255	tadA	3.88779	14.8027	0.0123139
						ACX60_00570	ACX60_00570	2.06755	4.19175	0.00100923		ACX60_10705	ntaA_1	3.27683	9.69222	0.0125673
						ACX60_07985	hslR	2.06838	4.19417	1.98449e-05		ACX60_14765	cobZ	4.18726	18.2176	0.0125925
						ACX60_02210	rpsK	2.06903	4.19605	0.00484804		ACX60_08685	ACX60_08685	3.17416	9.02645	0.0126208
						ACX60_07160	aleB	2.06919	4.1965	1.66274e-06		ACX60_08520	antA	2.87197	7.32065	0.0128214
						ACX60_02140	rpsQ	2.07058	4.20056	0.0116047		ACX60_03300	ACX60_03300	2.81835	7.05356	0.0128521
						ACX60_05160	ndh	2.07097	4.20168	4.72777e-06		ACX60_11625	clpV	1.57465	2.97863	0.0132278
						ACX60_09690	ACX60_09690	2.07982	4.22753	0.0368251		ACX60_10730	ychF	1.81374	3.51553	0.0134431
						ACX60_03870	lolA	2.08193	4.23373	3.00202e-05		ACX60_04115	folP	2.28246	4.86506	0.0134431
						ACX60_17870	ACX60_17870	2.08193	4.23373	3.69612e-05		ACX60_13400	ACX60_13400	3.52462	11.5084	0.0134431
						ACX60_01675	rpsP	2.08489	4.24241	0.000812402		ACX60_16145	seuB	3.11179	8.64452	0.0137201
						ACX60_02070	hmp	2.08624	4.24641	2.17687e-05		ACX60_02300	cicA	3.15643	8.91619	0.0137201
						ACX60_06590	ACX60_06590	2.08643	4.24695	0.065742		ACX60_06685	ACX60_06685	2.65263	6.28813	0.0137945
						ACX60_13940	olsB	2.09039	4.25864	0.00110808		ACX60_12450	ACX60_12450	3.74368	13.3955	0.0139116
						ACX60_04610	ybgC	2.09246	4.26474	0.00347648		ACX60_17660	ACX60_17660	2.79715	6.95068	0.0139737
						ACX60_06300	purF	2.09593	4.27502	0.00304927		ACX60_13700	yaeQ	1.72911	3.31523	0.0140715
						ACX60_09265	ACX60_09265	2.10645	4.30631	0.00256687		ACX60_01130	ACX60_01130	2.43782	5.41822	0.0141016
						ACX60_02520	rpsI	2.10735	4.309	0.00329394		ACX60_10565	ACX60_10565	3.12177	8.70452	0.0141758
						ACX60_11930	mdmC	2.10819	4.31151	0.00172109		ACX60_11600	ACX60_11600	2.64536	6.25654	0.0144632
						ACX60_06010	ACX60_06010	2.11076	4.31918	0.0283843		ACX60_14035	ACX60_14035	1.79653	3.47383	0.0144766
						ACX60_15325	ygdL	2.11367	4.32792	0.00430979		ACX60_18880	ACX60_18880	2.25839	4.78457	0.0145154
						ACX60_17935	ssuA	2.11413	4.32928	0.00172109		ACX60_01855	ACX60_01855	2.38744	5.23226	0.014701
						ACX60_09365	fccB	2.11739	4.33909	0.0149861		ACX60_09965	ACX60_09965	1.78066	3.43584	0.0149095
						ACX60_01930	ACX60_01930	2.12261	4.3548	0.00544332		ACX60_02735	ACX60_02735	3.46794	11.0651	0.0149095
						ACX60_17925	yohN	2.12742	4.36936	0.00100993		ACX60_14720	ACX60_14720	2.3608	5.13656	0.0149121
						ACX60_00500	katB	2.12752	4.36966	0.00321151		ACX60_14420	ACX60_14420	2.82829	7.10233	0.0149907
						ACX60_05225	ACX60_05225	2.12787	4.37073	0.00055941		ACX60_00690	puuE	2.49662	5.64361	0.0150455
						ACX60_08170	ACX60_08170	2.12969	4.37622	0.000276851		ACX60_01505	mraY	2.23664	4.71299	0.0151074
						ACX60_03325	typA	2.13255	4.38491	0.00055722		ACX60_15785	phoX	2.00596	4.01655	0.0151936
						ACX60_18655	repC	2.13403	4.38943	0.374589		ACX60_07530	ACX60_07530	3.15943	8.93476	0.015307
						ACX60_02105	rplW	2.13691	4.39818	0.004582		ACX60_17525	ACX60_17525	4.87079	29.2585	0.0153943
						ACX60_04690	entE	2.14094	4.4105	0.0419436		ACX60_04895	cysT	1.6627	3.16609	0.0154588
						ACX60_13515	pitA	2.15012	4.43864	5.40688e-06		ACX60_10665	ropAch1	2.93638	7.65489	0.0154588
						ACX60_08110	brnQ	2.15905	4.4662	0.0133496		ACX60_17925	yohN	1.61242	3.05764	0.0156767
						ACX60_00670	tsx	2.17327	4.51045	0.000410647		ACX60_16205	ACX60_16205	2.78198	6.87797	0.0157158
						ACX60_05260	rluA	2.17521	4.5165	0.000870747		ACX60_08430	quiA	2.37955	5.20373	0.0158254
						ACX60_02225	rplQ	2.17797	4.52515	0.000748733		ACX60_08460	ACX60_08460	2.95842	7.7727	0.0158254
						ACX60_02125	rpsC	2.17913	4.52882	0.000394941		ACX60_14165	yfiH	2.60252	6.07346	0.0159119
						ACX60_07910	rimO	2.17948	4.52991	7.59993e-05		ACX60_08625	ACX60_08625	3.5174	11.451	0.0159156
						ACX60_05865	ACX60_05865	2.18128	4.53556	0.00835222		ACX60_11190	ACX60_11190	2.82389	7.08071	0.0163116
						ACX60_12265	pyrB	2.18634	4.55149	0.000234666		ACX60_18895	ACX60_18895	2.18388	4.54373	0.016396
						ACX60_16675	rplA	2.18869	4.5589	0.00269535		ACX60_08510	ACX60_08510	3.76294	13.5755	0.0164719
						ACX60_03455	dapE	2.18946	4.56136	0.000195908		ACX60_12745	ACX60_12745	2.29532	4.90862	0.0167482
						ACX60_12705	ACX60_12705	2.1937	4.57479	0.0949145		ACX60_07770	nasA	1.66043	3.16112	0.0168896
						ACX60_09695	ACX60_09695	2.21091	4.62968	0.160708		ACX60_12770	vanA	2.35725	5.12391	0.0168901
						ACX60_05625	cirA	2.22106	4.66237	0.000139609		ACX60_15765	ACX60_15765	1.57847	2.98653	0.0170087
						ACX60_13845	emrA	2.22279	4.66796	0.000359018		ACX60_01595	pilA	2.86187	7.26957	0.0170744
						ACX60_06710	rpsF	2.2266	4.68028	0.000126827		ACX60_08800	ACX60_08800	2.39544	5.26136	0.0170841
						ACX60_14145	fdx1	2.23377	4.70362	9.44117e-06		ACX60_15575	ACX60_15575	1.7505	3.36474	0.0170985
						ACX60_03560	sbmA	2.23505	4.7078	0.000737395		ACX60_13685	pgaC	2.021	4.05864	0.0170985
						ACX60_00830	ACX60_00830	2.23526	4.70847	4.64857e-06		ACX60_06615	ACX60_06615	2.27632	4.84441	0.0171645
						ACX60_01680	rimM	2.23623	4.71164	0.000282214		ACX60_12700	ACX60_12700	2.89985	7.46351	0.0173055
						ACX60_06075	fpr	2.24303	4.7339	0.000171249		ACX60_10735	ACX60_10735	3.1456	8.8495	0.0173055
						ACX60_04635	purL	2.24371	4.73612	1.01278e-05		ACX60_18980	ACX60_18980	2.06477	4.18366	0.017364
						ACX60_13495	pkn1	2.24539	4.74164	0.0137955		ACX60_15225	ACX60_15225	2.08144	4.23231	0.017364
						ACX60_03230	ACX60_03230	2.24569	4.74263	0.000164718		ACX60_12685	ACX60_12685	2.89273	7.42673	0.017364
						ACX60_16680	rplK	2.24641	4.74499	0.00271592		ACX60_11880	ACX60_11880	3.1289	8.74769	0.0175796
						ACX60_14025	rimI	2.25179	4.76272	0.000644901		ACX60_08835	ACX60_08835	2.00873	4.02429	0.0177295
						ACX60_16860	murD	2.252	4.76341	0.000726771		ACX60_01190	ACX60_01190	3.05327	8.30093	0.0177906
						ACX60_07615	ACX60_07615	2.2524	4.76473	0.0566046		ACX60_12080	ACX60_12080	2.56521	5.9184	0.0178118
						ACX60_17850	murJ	2.25321	4.76742	7.67054e-05		ACX60_14135	ACX60_14135	2.8571	7.24556	0.0178118
						ACX60_01790	ACX60_01790	2.25719	4.78061	0.000426573		ACX60_04735	ACX60_04735	2.60655	6.09044	0.017904
						ACX60_02405	ACX60_02405	2.26304	4.80003	0.00428433		ACX60_06590	ACX60_06590	2.74032	6.68221	0.017904
						ACX60_13170	ACX60_13170	2.26471	4.80556	1.01694e-05		ACX60_00660	alc	2.30191	4.9311	0.0180517
						ACX60_06035	hisQ	2.26646	4.81142	0.266473		ACX60_07190	yhbS	3.39643	10.5299	0.018198
						ACX60_14195	lolB	2.2807	4.85913	0.000234463		ACX60_09265	ACX60_09265	1.65271	3.14424	0.0183916
						ACX60_02120	rplV	2.28383	4.8697	0.00256615		ACX60_10215	ACX60_10215	2.41415	5.33004	0.0184106
						ACX60_02115	rpsS	2.28692	4.88013	0.00598875		ACX60_03895	ACX60_03895	2.09988	4.28673	0.0187412
						ACX60_09040	ACX60_09040	2.28712	4.88081	0.411615		ACX60_08735	fadD	2.68465	6.42924	0.018769
						ACX60_13235	rlmH	2.28872	4.88623	0.000724135		ACX60_06460	MA20_41470	2.71704	6.57523	0.0194392
						ACX60_10750	ACX60_10750	2.29034	4.89173	8.05173e-05		ACX60_01075	cfa	1.87492	3.66782	0.0194435
						ACX60_12420	ACX60_12420	2.29987	4.92414	0.375587		ACX60_07315	plcN1	2.73121	6.64011	0.0195887
						ACX60_12765	vanK	2.30531	4.94273	0.143543		ACX60_13850	yigI	2.54813	5.84878	0.0196522
						ACX60_13255	rnfB	2.30927	4.95634	0.000178919		ACX60_07050	eat	2.87555	7.33885	0.0196806
						ACX60_03045	ACX60_03045	2.31102	4.96234	0.00455669		ACX60_17225	ACX60_17225	2.63992	6.23297	0.0197195
						ACX60_11925	ACX60_11925	2.316	4.97949	6.29268e-05		ACX60_00635	ACX60_00635	3.4147	10.6642	0.0197324
						ACX60_00895	mscS	2.31949	4.99154	1.63208e-05		ACX60_00580	dsbB	2.78315	6.88354	0.0197412
						ACX60_16670	rplJ	2.32067	4.99566	0.000302056		ACX60_06940	ACX60_06940	2.52235	5.74518	0.0199661
						ACX60_00355	ACX60_00355	2.32436	5.00844	0.0871833		ACX60_04525	purN	1.95119	3.86693	0.0200223
						ACX60_03935	ACX60_03935	2.329	5.02459	0.000592217		ACX60_07250	ydcO	1.52788	2.88363	0.0200995
						ACX60_11035	chrR	2.33081	5.03086	0.00123633		ACX60_18370	ACX60_18370	1.75942	3.38562	0.0206201
						ACX60_04955	lepB	2.33487	5.04505	4.38695e-05		ACX60_16150	ACX60_16150	2.35391	5.11208	0.0206991
						ACX60_07565	ACX60_07565	2.35599	5.11946	0.00710279		ACX60_00140	ACX60_00140	2.45505	5.48332	0.0206991
						ACX60_14200	ispE	2.36229	5.14187	7.98744e-05		ACX60_12475	ACX60_12475	3.11172	8.64411	0.020748
						ACX60_07630	ACX60_07630	2.36718	5.15932	0.17392		ACX60_15780	tatC	2.05779	4.16348	0.0208043
						ACX60_16000	infA	2.37941	5.20323	0.000134093		ACX60_04745	ACX60_04745	2.7631	6.78852	0.0209925
						ACX60_01285	puuR_1	2.38435	5.22108	0.0051585		ACX60_00210	yafC	2.45924	5.49929	0.0211079
						ACX60_06515	proP	2.38616	5.22763	1.59091e-05		ACX60_18160	dsbC	2.33687	5.05204	0.021117
						ACX60_16815	ywfM	2.38844	5.23592	0.102885		ACX60_08660	ACX60_08660	3.0363	8.20385	0.021117
						ACX60_00180	dnaJ	2.38855	5.23631	9.37336e-05		ACX60_13565	fsr	3.13984	8.81425	0.021117
						ACX60_02185	rpmD	2.3935	5.25431	0.0249525		ACX60_01105	ACX60_01105	1.88747	3.69987	0.0212928
						ACX60_07415	ACX60_07415	2.39574	5.26246	0.216057		ACX60_01530	pilN	2.70807	6.53446	0.0213335
						ACX60_04855	ACX60_04855	2.4079	5.30702	1.01278e-05		ACX60_02580	yfiB	2.8999	7.46372	0.021464
						ACX60_15880	ACX60_15880	2.41025	5.31565	6.84838e-06		ACX60_15925	yybR	2.5317	5.78255	0.0216192
						ACX60_12240	trmB	2.4116	5.32065	1.97654e-05		ACX60_12840	aldH	2.32368	5.00607	0.0220651
						ACX60_14295	yceD	2.41183	5.32148	2.2355e-05		ACX60_13760	ACX60_13760	3.62628	12.3486	0.0220651
						ACX60_09095	ACX60_09095	2.42419	5.36728	0.21776		ACX60_07715	hcaT	2.54609	5.84051	0.0225729
						ACX60_10875	arsC	2.42529	5.37136	0.0907544		ACX60_18515	ACX60_18515	2.50665	5.68301	0.0226925
						ACX60_06330	rpsU	2.42599	5.37396	0.000274515		ACX60_07415	ACX60_07415	3.966	15.6274	0.0227247
						ACX60_09685	ACX60_09685	2.43217	5.39705	1.31105e-06		ACX60_05010	ACX60_05010	2.35638	5.12085	0.0228191
						ACX60_05960	mrdB	2.43553	5.40963	6.08628e-05		ACX60_05060	rarD	2.22705	4.68175	0.0228557
						ACX60_05675	basI	2.44095	5.42999	0.0877609		ACX60_07555	ACX60_07555	3.28979	9.77973	0.0228557
						ACX60_10055	ACX60_10055	2.44565	5.44771	0.0461579		ACX60_17965	pfs	1.82919	3.55337	0.0230179
						ACX60_09780	iscR	2.45803	5.49464	0.000163756		ACX60_13220	plpD	2.3119	4.96536	0.0230671
						ACX60_02135	rpmC	2.46523	5.52217	0.0145901		ACX60_06945	ACX60_06945	1.72239	3.29983	0.0232446
						ACX60_15165	infC	2.46929	5.5377	4.08248e-05		ACX60_16065	romA	1.55972	2.94796	0.0232676
						ACX60_10905	pucI	2.47227	5.54917	0.00163118		ACX60_01140	ACX60_01140	3.09704	8.55659	0.0233711
						ACX60_14320	rluB	2.47375	5.55487	3.97064e-05		ACX60_17670	ACX60_17670	2.85448	7.23241	0.0234438
						ACX60_15530	fcbC	2.48556	5.60051	0.0034173		ACX60_12590	ACX60_12590	2.91028	7.51763	0.0238493
						ACX60_17115	yicG	2.50345	5.67041	4.10517e-05		ACX60_02815	ACX60_02815	2.47254	5.55021	0.0238785
						ACX60_09280	ACX60_09280	2.50945	5.69401	1.12017e-06		ACX60_13215	ygfA	2.39419	5.25682	0.0239977
						ACX60_05915	rpsB	2.51146	5.70197	0.000220747		ACX60_11065	cidA	2.80073	6.96791	0.0239977
						ACX60_05410	surE	2.5119	5.7037	5.14794e-05		ACX60_07855	ACX60_07855	2.45712	5.49119	0.024011
						ACX60_14855	ACX60_14855	2.52898	5.77162	5.05973e-05		ACX60_11020	mdcB	2.94216	7.6856	0.024011
						ACX60_04680	ACX60_04680	2.52924	5.77267	0.000253302		ACX60_01195	MA20_27600	3.33403	10.0842	0.0241329
						ACX60_16665	rplL	2.54938	5.85383	0.00035003		ACX60_12695	ephD	2.25471	4.77238	0.0241335
						ACX60_17185	ACX60_17185	2.55709	5.88519	0.00375262		ACX60_09750	alkM	2.4144	5.33098	0.0242024
						ACX60_15835	exbD2	2.55957	5.89533	1.25298e-05		ACX60_14845	ACX60_14845	1.73052	3.31847	0.0243227
						ACX60_05445	rpmE	2.56006	5.89734	0.00500828		ACX60_04325	ACX60_04325	2.78983	6.9155	0.0243396
						ACX60_04240	ttcA	2.57156	5.94452	3.32323e-06		ACX60_02495	atuE	3.08891	8.50852	0.0243982
						ACX60_05920	tsf	2.58899	6.01678	0.000936355		ACX60_08860	ACX60_08860	2.42874	5.38423	0.0246998
						ACX60_08955	metF	2.59718	6.05101	0.00276344		ACX60_07215	yheS_2	1.73077	3.31906	0.0248507
						ACX60_13700	yaeQ	2.60018	6.06361	0.000369273		ACX60_02020	ComFC	2.81208	7.02297	0.0248507
						ACX60_03305	rtcB	2.66416	6.33857	3.5929e-06		ACX60_01700	lifO	1.58262	2.99513	0.0248956
						ACX60_10730	ychF	2.68713	6.44033	0.000400407		ACX60_10700	ACX60_10700	2.00366	4.01017	0.0248956
						ACX60_15470	grxC	2.69323	6.46758	4.01183e-05		ACX60_14120	yeaV	2.48503	5.59845	0.0248956
						ACX60_15105	ACX60_15105	2.70802	6.53426	0.00257312		ACX60_08425	oprB	3.01952	8.10897	0.0249898
						ACX60_06860	kdpA	2.7134	6.55867	0.000866261		ACX60_08930	ripA_2	2.8282	7.10186	0.0250523
						ACX60_12700	ACX60_12700	2.72831	6.6268	0.0212988		ACX60_06070	ACX60_06070	2.1433	4.41772	0.0251178
						ACX60_11065	cidA	2.73864	6.67443	0.0236259		ACX60_18875	ACX60_18875	2.84634	7.19176	0.0254702
						ACX60_04675	ACX60_04675	2.74444	6.70131	0.000669938		ACX60_16185	yggH	2.50508	5.6768	0.0254835
						ACX60_10385	pgk	2.75124	6.73295	1.72422e-05		ACX60_06430	ACX60_06430	3.24185	9.46008	0.0255372
						ACX60_12365	lexA_2	2.75573	6.75392	0.0135853		ACX60_12560	ACX60_12560	4.30025	19.7018	0.0256303
						ACX60_05200	MA20_07835	2.75681	6.75902	3.60708e-05		ACX60_09670	ACX60_09670	3.51706	11.4483	0.0256939
						ACX60_18685	ACX60_18685	2.76272	6.78676	0.18479		ACX60_13955	dut	1.62903	3.09305	0.0257404
						ACX60_07445	ACX60_07445	2.77432	6.84156	0.0375606		ACX60_12815	ACX60_12815	2.70485	6.51989	0.025763
						ACX60_17525	ACX60_17525	2.77745	6.85639	0.168885		ACX60_00540	ACX60_00540	1.87673	3.67243	0.0258208
						ACX60_08225	fadD	2.79617	6.94593	1.18219e-06		ACX60_11350	ACX60_11350	1.84077	3.58202	0.0259386
						ACX60_09700	asbA	2.79804	6.95493	1.10642e-05		ACX60_01185	ACX60_01185	1.94964	3.86279	0.0260386
						ACX60_05620	fatB	2.80235	6.97575	0.000234463		ACX60_11040	ACX60_11040	1.76299	3.39401	0.0262465
						ACX60_15840	exbB	2.82739	7.09787	4.6506e-07		ACX60_11620	impA	1.81367	3.51535	0.0262465
						ACX60_06705	rpsR	2.8555	7.23755	0.00683101		ACX60_09140	ACX60_09140	3.14847	8.86712	0.0262465
						ACX60_05035	ACX60_05035	2.8871	7.39781	0.000142767		ACX60_08165	ftsY	1.53768	2.90327	0.0263877
						ACX60_16615	htpG	2.88833	7.40411	4.67282e-05		ACX60_02915	ACX60_02915	2.00608	4.0169	0.0263877
						ACX60_06700	rplI	2.90495	7.48989	0.000701908		ACX60_00320	ybbK	1.7583	3.383	0.0265812
						ACX60_17865	ACX60_17865	2.95278	7.74239	0.000175351		ACX60_14850	copB	3.32304	10.0077	0.0266089
						ACX60_13680	pgaD	2.95807	7.77082	0.0145951		ACX60_05975	yadH	1.88777	3.70063	0.0268146
						ACX60_07205	ACX60_07205	2.97513	7.86328	0.000237913		ACX60_13335	ACX60_13335	2.43088	5.39222	0.0268146
						ACX60_06945	ACX60_06945	2.99449	7.96949	0.000171239		ACX60_11365	pobA	1.5636	2.95591	0.0269734
						ACX60_02130	rplP	3.02996	8.16789	1.17158e-06		ACX60_12810	hcaD	4.01163	16.1294	0.0269734
						ACX60_09855	rpsT	3.03543	8.19891	7.98744e-05		ACX60_18365	dotC	1.5573	2.94302	0.0272744
						ACX60_03760	basS	3.03702	8.20793	1.08099e-07		ACX60_03740	ACX60_03740	1.94934	3.86197	0.0273889
						ACX60_09785	iscS	3.04024	8.22625	7.14595e-07		ACX60_05510	ACX60_05510	2.2588	4.78593	0.0274257
						ACX60_13685	pgaC	3.04819	8.27174	0.000489692		ACX60_05215	ACX60_05215	2.18019	4.53213	0.0275447
						ACX60_01690	rplS	3.04899	8.27632	6.07907e-05		ACX60_04205	dgkA	2.02899	4.08118	0.0278241
						ACX60_09705	acsC	3.05651	8.31955	2.30103e-07		ACX60_02085	ACX60_02085	1.87318	3.66339	0.0281374
						ACX60_05980	yadG	3.06729	8.38195	0.0001163		ACX60_08865	aldH	2.98526	7.91867	0.0283225
						ACX60_04205	dgkA	3.0919	8.52621	0.000952421		ACX60_01540	pilP	2.29711	4.91471	0.0283786
						ACX60_18675	trbL	3.10651	8.61298	0.0587628		ACX60_16575	ACX60_16575	2.69228	6.46335	0.0285223
						ACX60_18195	rpmH	3.12466	8.72198	0.00135618		ACX60_13630	padH	3.07022	8.39899	0.0285223
						ACX60_02785	czcC	3.13603	8.79104	0.00617025		ACX60_00265	ACX60_00265	1.83198	3.56026	0.0287074
						ACX60_11860	nolA	3.1398	8.81401	1.149e-05		ACX60_11655	ACX60_11655	2.18612	4.55079	0.0294813
						ACX60_15145	rpmI	3.14953	8.87366	0.000538644		ACX60_12705	ACX60_12705	2.86924	7.30678	0.0295606
						ACX60_16275	hslO	3.16675	8.98021	2.53673e-08		ACX60_04740	ACX60_04740	2.16754	4.49258	0.0296991
						ACX60_03860	rplU	3.19187	9.13796	4.16268e-06		ACX60_11955	ACX60_11955	1.89961	3.73111	0.0299702
						ACX60_00360	yciC	3.21206	9.26674	0.0879161		ACX60_13310	ureC	1.60063	3.03275	0.0301089
						ACX60_05905	ompW	3.23259	9.39953	0.000291737		ACX60_01180	yrkL	1.94197	3.84231	0.0305205
						ACX60_05335	pstS	3.25583	9.55216	2.43448e-06		ACX60_16225	ACX60_16225	2.81265	7.02573	0.0305866
						ACX60_15865	rpmB	3.28534	9.74961	7.08025e-08		ACX60_16540	ACX60_16540	2.39533	5.26097	0.030611
						ACX60_16600	frnE	3.28813	9.76848	4.03343e-08		ACX60_09105	ACX60_09105	2.33703	5.05261	0.0311684
						ACX60_05590	bauF	3.29022	9.78261	2.9037e-06		ACX60_12690	ACX60_12690	2.63275	6.20206	0.0313023
						ACX60_05665	barB	3.2968	9.82731	1.30933e-06		ACX60_11155	ACX60_11155	2.11238	4.32403	0.0315178
						ACX60_10410	bigR	3.32933	10.0515	6.88996e-05		ACX60_08175	ACX60_08175	1.61809	3.06969	0.0315777
						ACX60_15140	rplT	3.33025	10.0578	6.35477e-05		ACX60_04500	lolD	1.63254	3.10059	0.031637
						ACX60_12130	ACX60_12130	3.33897	10.1188	0.0119713		ACX60_12155	benA	1.6778	3.19939	0.0319125
						ACX60_04670	entA	3.34039	10.1288	0.000287335		ACX60_15205	folK	1.96864	3.91398	0.0319957
						ACX60_03065	yohN	3.34078	10.1315	0.000698329		ACX60_04780	ACX60_04780	2.89278	7.42702	0.032121
						ACX60_05595	basA	3.34665	10.1728	4.72777e-06		ACX60_10485	yigE	1.88967	3.70551	0.0323246
						ACX60_03300	ACX60_03300	3.34979	10.195	0.00319315		ACX60_10520	ACX60_10520	2.91678	7.55161	0.0323246
						ACX60_07525	ACX60_07525	3.38697	10.4612	0.0814663		ACX60_12355	ACX60_12355	2.28982	4.88994	0.0324905
						ACX60_13690	pgaB	3.39571	10.5247	1.59934e-06		ACX60_04295	ACX60_04295	2.40496	5.2962	0.0326271
						ACX60_13160	ACX60_13160*	3.41752	10.685	0.000109842		ACX60_02945	ACX60_02945	2.66059	6.32291	0.0327641
						ACX60_09795	iscA	3.47792	11.1419	7.14595e-07		ACX60_06785	NA	1.54223	2.91245	0.0329736
						ACX60_07855	ACX60_07855	3.48681	11.2108	0.00156539		ACX60_14770	tcuB	2.53967	5.81457	0.0329736
						ACX60_06790	ACX60_06790	3.49529	11.2769	9.82276e-09		ACX60_13770	ydgI	2.06268	4.17762	0.0331863
						ACX60_09710	emrB	3.50095	11.3211	1.47201e-05		ACX60_16160	rpmE2	4.01497	16.1668	0.0332567
						ACX60_13480	nfuA	3.52104	11.4799	2.67816e-06		ACX60_11110	sufS	2.63392	6.20711	0.0333007
						ACX60_12120	ACX60_12120	3.554	11.7452	1.41428e-06		ACX60_08775	ACX60_08775	2.07636	4.21743	0.0333888
						ACX60_08175	ACX60_08175	3.55642	11.7649	3.39568e-05		ACX60_08740	yocS	2.31902	4.98993	0.0337953
						ACX60_04720	basI	3.56313	11.8198	1.17451e-07		ACX60_12480	ACX60_12480	3.34533	10.1635	0.0337953
						ACX60_09470	osmB	3.57862	11.9473	0.000136353		ACX60_13495	pkn1	1.93512	3.8241	0.033896
						ACX60_00875	arsR	3.6114	12.2219	0.000327723		ACX60_05760	trpG	1.98946	3.97088	0.033896
						ACX60_18115	ybjG	3.62877	12.3699	4.38017e-06		ACX60_08410	pcaG	3.35729	10.2481	0.0339089
						ACX60_07685	ACX60_07685	3.64066	12.4723	0.0611705		ACX60_04050	ybaZ	2.78251	6.88048	0.0341041
						ACX60_05605	yclN	3.68175	12.8327	0.0276487		ACX60_12865	ACX60_12865	2.10109	4.29034	0.0341826
						ACX60_00880	xenB	3.69205	12.9246	1.0231e-06		ACX60_09210	ACX60_09210	2.33889	5.05915	0.0343295
						ACX60_05670	basH	3.70589	13.0492	5.52845e-07		ACX60_10150	cohE	2.07935	4.22616	0.0345149
						ACX60_09790	iscU	3.71823	13.1613	2.89662e-07		ACX60_13000	ACX60_13000	2.62949	6.18808	0.0354728
						ACX60_09610	ACX60_09610	3.73379	13.304	1.03356e-07		ACX60_09020	ACX60_09020	2.81983	7.06077	0.0355397
						ACX60_16035	ACX60_18075	3.74177	13.3778	1.24896e-05		ACX60_05580	srr	1.52772	2.88329	0.0355762
						ACX60_18075	ACX60_18075	3.76982	13.6405	3.00202e-05		ACX60_14125	dmlA	2.1431	4.41711	0.0358863
						ACX60_03085	ACX60_03085	3.83309	14.252	1.11762e-07		ACX60_11590	yahD	1.82183	3.53528	0.0359496
						ACX60_09605	ACX60_09605	3.84229	14.3431	0.000459596		ACX60_09570	ybhR	1.8188	3.52788	0.0362522
						ACX60_02350	xpt	3.85028	14.4228	1.31105e-06		ACX60_18595	feoA	2.34306	5.07379	0.036898
						ACX60_15730	ACX60_15730	3.86037	14.5241	2.84687e-09		ACX60_07035	guaA_1	1.51025	2.84859	0.03739
						ACX60_03755	pmrA	3.87699	14.6923	3.93818e-08		ACX60_13655	ndoA	3.43614	10.8239	0.0375238
						ACX60_15845	tonB	3.88017	14.7247	7.08025e-08		ACX60_08635	aldH	2.0356	4.09994	0.0379899
						ACX60_06780	yvbT	3.90259	14.9553	9.01644e-09		ACX60_06930	ACX60_06930	1.59812	3.02748	0.0380866
						ACX60_03510	sanA	3.95563	15.5154	2.14382e-07		ACX60_09355	hom	2.15303	4.4476	0.0386093
						ACX60_10850	ACX60_10850	3.97566	15.7323	0.00114743		ACX60_08040	ybaR	1.69005	3.22668	0.0386222
						ACX60_04730	fcuA	4.00375	16.0417	0.000126827		ACX60_12575	ACX60_12575	2.456	5.48695	0.038646
						ACX60_09600	ACX60_09600	4.109	17.2556	4.09485e-10		ACX60_18380	ACX60_18380	2.14448	4.42132	0.038888
						ACX60_11060	ywbG	4.11674	17.3485	0.00174517		ACX60_16920	ACX60_16920	1.93841	3.83283	0.0389246
						ACX60_06110	MA20_03590	4.17288	18.0369	7.14595e-07		ACX60_04555	ACX60_04555	2.36042	5.13519	0.039385
						ACX60_10845	ahpF	4.2048	18.4405	1.03356e-07		ACX60_14835	ogt	2.90131	7.47106	0.0397912
						ACX60_11195	ACX60_11195	4.25473	19.0898	6.24992e-05		ACX60_12110	pltP	2.01831	4.05109	0.0399682
						ACX60_10855	ACX60_10855	4.29439	19.6219	0.000545005		ACX60_08535	ACX60_08535	1.889	3.70379	0.0400775
						ACX60_01920	ACX60_01920	4.29666	19.6528	0.000197894		ACX60_06000	ACX60_06000	1.60251	3.03672	0.040148
						ACX60_05615	yclP	4.34274	20.2906	7.26701e-07		ACX60_09690	ACX60_09690	2.07176	4.204	0.0405531
						ACX60_12220	ahpF	4.39602	21.054	4.16556e-08		ACX60_09695	ACX60_09695	3.18175	9.07408	0.040681
						ACX60_16550	ACX60_16550	4.46311	22.0561	4.10585e-07		ACX60_15490	fabF2	1.62324	3.08066	0.0413781
						ACX60_14460	mtnN	4.468	22.131	2.02254e-07		ACX60_15570	ACX60_15570	1.61147	3.05562	0.0417049
						ACX60_03750	eptA	4.47882	22.2976	8.7313e-10		ACX60_08415	aroD	2.34316	5.07411	0.0419287
						ACX60_04435	arnT	4.52105	22.96	5.37473e-05		ACX60_09075	ACX60_09075	2.49607	5.64147	0.0423308
						ACX60_03730	rssA	4.54364	23.3224	8.19213e-09		ACX60_04285	ACX60_04285	2.14639	4.42719	0.0424653
						ACX60_06015	mexF	4.56633	23.6921	1.07448e-06		ACX60_08785	ACX60_08785	2.01115	4.03104	0.0426346
						ACX60_16610	ACX60_16610	4.58579	24.0137	6.55862e-06		ACX60_09190	ACX60_09190	1.70297	3.2557	0.0431141
						ACX60_14240	panD	4.58842	24.0576	9.05874e-07		ACX60_11515	ooxA	2.35151	5.10359	0.0436707
						ACX60_01610	bfd	4.64053	24.9424	7.08025e-08		ACX60_08920	ACX60_08920	2.68515	6.4315	0.0437238
						ACX60_05735	yfcN	4.6893	25.8001	1.03753e-08		ACX60_12510	ACX60_12510	1.59442	3.01973	0.0437281
						ACX60_02755	ACX60_02755	4.70295	26.0452	9.19168e-09		ACX60_14660	ACX60_14660	1.71662	3.28666	0.045067
						ACX60_16160	rpmE2	4.7432	26.7821	0.0108746		ACX60_18315	ACX60_18315	1.68662	3.21902	0.0451132
						ACX60_05660	pchH	4.75382	26.98	4.16556e-08		ACX60_15795	ACX60_15795	2.15878	4.46536	0.0451634
						ACX60_04725	basH	4.76327	27.1574	4.54095e-10		ACX60_03365	ACX60_03365	2.1161	4.3352	0.0455289
						ACX60_05610	bauC	4.77311	27.3432	0.00169994		ACX60_04580	ACX60_04580	2.15705	4.46001	0.045562
						ACX60_06785	ACX60_06785	4.78779	27.6228	3.93818e-08		ACX60_00335	ACX60_00335	1.52474	2.87736	0.0456653
						ACX60_10745	ACX60_10745	4.79908	27.8398	1.38487e-07		ACX60_04910	pabC	1.83399	3.56522	0.0456653
						ACX60_12135	cueR	4.81366	28.1226	3.55524e-05		ACX60_18220	ACX60_18220	1.79051	3.45938	0.0458476
						ACX60_03765	ACX60_03765	4.87389	29.3216	1.31223e-05		ACX60_12795	hcaA	2.11415	4.32935	0.0459116
						ACX60_09720	ACX60_09720	4.89371	29.7272	1.03356e-07		ACX60_03780	ACX60_03780	1.59518	3.02133	0.0459782
						ACX60_04655	ACX60_04655	4.90668	29.9955	4.43036e-05		ACX60_12070	ACX60_12070	2.96212	7.79269	0.0459782
						ACX60_05680	entC	4.92152	30.3058	8.19213e-09		ACX60_09115	adeS	2.4614	5.5075	0.046242
						ACX60_04660	entC	4.92628	30.4059	3.26861e-08		ACX60_07435	cohE	2.20432	4.60857	0.0463277
						ACX60_05650	hdc	4.93134	30.5126	1.62692e-05		ACX60_00340	maiA	1.59345	3.01769	0.0463695
						ACX60_05600	ACX60_05600	4.93265	30.5405	4.16556e-08		ACX60_13485	ACX60_13485	2.06307	4.17874	0.0465396
						ACX60_09715	iucD	4.95706	31.0616	1.03753e-08		ACX60_11615	hsiJ1	1.6535	3.14596	0.0466148
						ACX60_07245	mgtC	5.08214	33.8747	1.77614e-08		ACX60_07880	ispF	1.60985	3.0522	0.0469905
						ACX60_16820	ACX60_16820	5.14193	35.3082	7.24446e-09		ACX60_12235	ACX60_12235	1.54965	2.92746	0.0470042
						ACX60_05630	iucD	5.1863	36.411	4.60534e-09		ACX60_07045	eutB	1.96519	3.90464	0.0479378
						ACX60_04445	MA20_05865	5.24859	38.0174	1.09742e-05		ACX60_10135	ACX60_10135	2.72635	6.6178	0.0483632
						ACX60_02760	ACX60_02760	5.29266	39.1968	1.64674e-10		ACX60_00505	ankB	2.93107	7.62677	0.0485104
						ACX60_12010	ACX60_12010	5.46771	44.2531	2.34934e-06		ACX60_06450	phbC	1.63679	3.10974	0.0490056
						ACX60_05645	entB	5.48545	44.8007	5.20842e-10		ACX60_17075	ACX60_17075	2.28749	4.88206	0.0495351
						ACX60_06020	mexE	5.51687	45.7872	1.99332e-07		ACX60_07040	eutC	2.09933	4.28511	0.0499038
						ACX60_12015	ACX60_12015	5.58321	47.9419	9.16558e-09		ACX60_15305	ygaY	1.78867	3.45497	0.0499514
						ACX60_13715	ACX60_13715	5.75074	53.845	7.08025e-08
						ACX60_18045	ACX60_18045	5.79923	55.6855	2.89226e-10
						ACX60_05640	entE	5.86791	58.4007	1.38487e-07
						ACX60_10565	ACX60_10565	5.90478	59.9122	1.34039e-05
						ACX60_04450	ACX60_04450	5.98208	63.21	4.16556e-08
						ACX60_04270	dhbF	6.08814	68.0321	4.33219e-10
						ACX60_09665	iucB	6.18658	72.8358	2.68179e-10
						ACX60_12140	ACX60_12140	6.79949	111.391	4.77369e-13
						ACX60_12145	copZ	7.06888	134.259	1.14149e-08
						ACX60_05635	ACX60_05635	7.16661	143.669	1.29895e-10
						ACX60_02775	copB	7.20871	147.924	4.89635e-11
						ACX60_02770	ACX60_02770	7.55184	187.642	1.05915e-12
						ACX60_02740	copD	8.40582	339.16	7.78112e-13
						ACX60_07240	mgtA	8.9089	480.668	8.74184e-10
						ACX60_10570	ACX60_10570	9.67467	817.273	2.68179e-10
						ACX60_02765	ACX60_02765	10.2383	1207.91	4.06177e-14
						ACX60_02745	copC	11.6951	3315.69	4.06177e-14

## Sheet: Sheet3
locus_tag	gene_name_EN	logFC	Fold change	FDR
ACX60_08515	ACX60_08515	-6.83548	114.205	0.00133729
ACX60_08500	gatA	-6.21935	74.5091	9.49205e-05
ACX60_04310	ACX60_04310	-6.15777	71.3959	0.00588171
ACX60_08525	hcaA2	-5.78323	55.0714	0.000487478
ACX60_13630	padH	-5.46044	44.0306	0.0417883
ACX60_12385	ACX60_12385	-5.39632	42.1166	0.0479982
ACX60_11225	ACX60_11225	-5.25123	38.0871	0.00147573
ACX60_14355	otsA	-4.84259	28.6923	7.91909e-06
ACX60_07095	ACX60_07095	-4.75271	26.9592	0.00263255
ACX60_14660	ACX60_14660	-4.74786	26.8688	0.000102714
ACX60_14350	otsB	-4.70055	26.002	0.00235758
ACX60_06410	ACX60_06410	-4.6502	25.1101	0.0011913
ACX60_16845	dksA	-4.61545	24.5126	3.93483e-07
ACX60_12125	ACX60_12125	-4.52684	23.0523	0.0162748
ACX60_11240	ACX60_11240	-4.47358	22.2169	0.0055523
ACX60_12050	ACX60_12050	-4.39192	20.9942	0.00321104
ACX60_00910	yddQ	-4.33809	20.2253	0.00393114
ACX60_08510	ACX60_08510	-4.27701	19.3869	0.0103079
ACX60_08505	ACX60_08505	-4.18286	18.1621	0.00187671
ACX60_06425	ygiW	-4.13798	17.6058	0.0252354
ACX60_14525	ACX60_14525	-4.13277	17.5424	4.74368e-07
ACX60_11220	ACX60_11220	-4.05918	16.67	0.000321661
ACX60_07370	ACX60_07370	-4.05632	16.637	4.93885e-06
ACX60_00260	ACX60_00260	-3.79354	13.8665	9.49205e-05
ACX60_04030	ACX60_04030	-3.77993	13.7364	7.04306e-08
ACX60_04070	acnR	-3.71763	13.1558	0.0312848
ACX60_06415	ACX60_06415	-3.70836	13.0716	0.000360039
ACX60_11205	katE	-3.61521	12.2543	4.90711e-07
ACX60_01700	lifO	-3.55616	11.7628	0.000247659
ACX60_09420	ACX60_09420	-3.51847	11.4595	3.23992e-05
ACX60_04355	ydeP	-3.46462	11.0396	1.2216e-07
ACX60_17155	ACX60_17155	-3.4448	10.889	1.2216e-07
ACX60_01715	ACX60_01715	-3.43914	10.8464	0.000148413
ACX60_09100	ACX60_09100	-3.39585	10.5258	0.0477857
ACX60_14470	ACX60_14470	-3.36052	10.2711	0.000105187
ACX60_08530	ACX60_08530	-3.34872	10.1874	0.00173143
ACX60_17565	mmsA	-3.34609	10.1689	4.97373e-05
ACX60_08520	antA	-3.32338	10.0101	0.0179965
ACX60_12995	dadA2	-3.29692	9.82813	0.000105645
ACX60_00905	acsA	-3.29124	9.78956	5.31658e-08
ACX60_18155	ACX60_18155	-3.28852	9.77111	0.00888921
ACX60_16585	ACX60_16585	-3.27964	9.71112	1.37948e-05
ACX60_17560	mmsB	-3.23785	9.4339	1.82047e-05
ACX60_05500	ACX60_05500	-3.17006	9.00081	0.0405598
ACX60_05875	fadE	-3.162	8.95068	4.93885e-06
ACX60_11200	ACX60_11200	-3.1508	8.88151	0.00137363
ACX60_08675	ACX60_08675	-3.14868	8.86843	0.00849985
ACX60_01060	ycaC	-3.09225	8.52827	5.23699e-07
ACX60_15175	ACX60_15175	-3.08726	8.49883	5.90444e-06
ACX60_07070	dhaT	-3.08621	8.49262	0.000142206
ACX60_14975	raiA	-3.0379	8.21292	5.8088e-06
ACX60_15330	acnA	-3.0357	8.20043	5.26201e-06
ACX60_14520	ygxB	-3.00621	8.0345	1.81125e-06
ACX60_09235	scoA	-2.99402	7.96692	7.91909e-06
ACX60_06830	acs-2	-2.99393	7.96643	0.000454316
ACX60_11210	ACX60_11210	-2.99299	7.96122	0.000242783
ACX60_14780	ACX60_14780	-2.97695	7.87318	0.00406875
ACX60_15710	ACX60_15710	-2.96209	7.79255	0.0227391
ACX60_09240	scoB	-2.93728	7.65964	2.1302e-05
ACX60_06400	ACX60_06400	-2.93011	7.62169	0.00140951
ACX60_17555	acs-2	-2.89182	7.42206	0.0013622
ACX60_12985	ACX60_12985	-2.89035	7.41452	0.00562488
ACX60_08540	C1-hpah	-2.8817	7.37017	0.0178366
ACX60_12255	ACX60_12255	-2.86112	7.26581	5.90444e-06
ACX60_02305	ACX60_02305	-2.83997	7.16007	3.93483e-07
ACX60_08815	ACX60_08815	-2.81765	7.05015	0.041951
ACX60_14420	ACX60_14420	-2.81405	7.03257	0.0487441
ACX60_05720	xdhA	-2.80821	7.00413	0.000409518
ACX60_11280	ivd	-2.79517	6.94114	0.000724643
ACX60_09470	osmB	-2.7941	6.93597	0.0157511
ACX60_08535	ACX60_08535	-2.75388	6.74528	0.00544273
ACX60_14115	ACX60_14115	-2.73653	6.66465	0.041951
ACX60_13625	sauU	-2.72703	6.62091	0.0407661
ACX60_02460	ACX60_02460	-2.69993	6.49771	0.00156959
ACX60_06395	gabP	-2.68918	6.44946	0.00190765
ACX60_06085	ACX60_06085	-2.64432	6.25199	0.0190847
ACX60_03400	yegP	-2.63384	6.20677	7.80521e-05
ACX60_06655	ACX60_06655	-2.63265	6.20164	0.000806459
ACX60_05140	ACX60_05140	-2.61535	6.1277	0.000517248
ACX60_10605	yyaM	-2.59069	6.02386	0.000244077
ACX60_11365	pobA	-2.57737	5.96851	0.00151351
ACX60_05945	ACX60_05945	-2.56272	5.90822	2.63245e-05
ACX60_09575	ybhS	-2.53623	5.80073	0.00562488
ACX60_02700	ACX60_02700	-2.52352	5.74983	0.00255069
ACX60_17535	ACX60_17535	-2.51729	5.72505	0.00209196
ACX60_14795	ACX60_14795	-2.50898	5.69216	0.00526991
ACX60_14785	gcdH	-2.50831	5.68953	7.27391e-07
ACX60_05130	ACX60_05130	-2.50603	5.68054	2.24928e-05
ACX60_13740	betI	-2.47601	5.56358	0.000381102
ACX60_09415	lipA	-2.46579	5.52428	0.000519717
ACX60_02400	ACX60_02400	-2.46473	5.52022	0.00019778
ACX60_09530	ACX60_09530	-2.44287	5.43724	0.000309801
ACX60_06000	ACX60_06000	-2.43266	5.39889	0.00901123
ACX60_05145	ACX60_05145	-2.42811	5.38188	0.000385217
ACX60_17885	ACX60_17885	-2.42371	5.3655	0.0128804
ACX60_03385	ACX60_03385	-2.42029	5.35278	0.000429067
ACX60_00695	hpf	-2.41994	5.35148	0.000476577
ACX60_09580	ybhF	-2.39673	5.26609	0.000117989
ACX60_07870	ACX60_07870	-2.38839	5.23572	0.000101649
ACX60_06585	ACX60_06585	-2.37506	5.18757	0.0186954
ACX60_03280	ACX60_03280	-2.37409	5.18407	0.000881612
ACX60_02250	ACX60_02250	-2.37216	5.17717	0.00321333
ACX60_16645	ACX60_16645	-2.35671	5.12202	0.000937712
ACX60_05135	ACX60_05135	-2.35559	5.11804	2.61444e-05
ACX60_13790	ACX60_13790	-2.3507	5.10071	0.000724643
ACX60_14735	yxeP_1	-2.34839	5.09257	0.00380419
ACX60_01855	ACX60_01855	-2.33019	5.02873	0.0450179
ACX60_06390	mmsA	-2.32145	4.99836	0.041951
ACX60_03585	pfpI	-2.3144	4.97398	1.08973e-05
ACX60_00945	yjcH	-2.30552	4.94346	0.000229715
ACX60_09245	atoE	-2.28931	4.88823	0.000336364
ACX60_10610	ACX60_10610	-2.27821	4.85075	0.00147252
ACX60_08395	pcaK	-2.27754	4.84852	0.0218341
ACX60_12830	hcaG	-2.27067	4.82546	0.00713761
ACX60_07785	moaA	-2.25019	4.75745	0.000377103
ACX60_15655	ACX60_15655	-2.23477	4.70688	0.000625586
ACX60_11310	ACX60_11310	-2.22743	4.68299	0.000806459
ACX60_01390	ACX60_01390	-2.2237	4.67091	0.0130897
ACX60_07205	ACX60_07205	-2.21094	4.62975	0.00594011
ACX60_12030	ACX60_12030	-2.20322	4.60507	0.000591558
ACX60_17550	mmgC	-2.20288	4.60397	1.85677e-05
ACX60_16605	ACX60_16605	-2.19246	4.57084	8.9688e-05
ACX60_12805	fcs	-2.18776	4.55598	0.0018712
ACX60_12155	benA	-2.17969	4.53056	0.0171102
ACX60_14900	yrdA	-2.17951	4.53	0.045592
ACX60_12150	benM	-2.17784	4.52476	0.0140916
ACX60_14020	ate	-2.15357	4.44928	1.85677e-05
ACX60_16640	ACX60_16640	-2.1404	4.40884	0.0121251
ACX60_02750	pacS	-2.13335	4.38736	7.65612e-06
ACX60_13500	ACX60_13500	-2.13271	4.3854	0.0474546
ACX60_11285	mccB	-2.11882	4.34337	0.00610011
ACX60_08420	quiC	-2.10298	4.29597	0.0154849
ACX60_05575	yhhW	-2.1026	4.29484	0.00500145
ACX60_00280	yfdC	-2.10178	4.29239	0.0267151
ACX60_06825	mmgC	-2.10006	4.28728	0.00152763
ACX60_02475	atuA	-2.08758	4.25036	0.00747698
ACX60_06570	ygeA	-2.07557	4.21511	0.00247845
ACX60_11260	ropAch1	-2.07146	4.2031	0.0182157
ACX60_06260	ACX60_06260	-2.063	4.17855	0.0258754
ACX60_16060	katG	-2.05812	4.16442	0.000162903
ACX60_11290	liuC	-2.05724	4.16188	0.00968854
ACX60_04175	glpD	-2.05188	4.14646	0.000102714
ACX60_15690	ackA	-2.05121	4.14452	0.000232574
ACX60_16285	cbpA	-2.04219	4.11869	2.93857e-05
ACX60_12140	ACX60_12140	-2.04141	4.11648	0.000108701
ACX60_05475	ybdD	-2.03832	4.10766	0.0219554
ACX60_00270	yliI	-2.03516	4.09868	0.00111174
ACX60_07105	ACX60_07105	-2.02969	4.08316	0.0118527
ACX60_05325	ipdC	-2.02578	4.07212	0.0083464
ACX60_07055	aldA	-2.02513	4.07028	0.00152763
ACX60_10795	btuE	-2.02276	4.06361	9.49205e-05
ACX60_04875	ACX60_04875	-2.00654	4.01818	0.00296108
ACX60_05790	ACX60_05790	-1.99802	3.99451	0.014211
ACX60_11820	ACX60_11820	-1.99015	3.97278	2.20788e-05
ACX60_10800	msrB	-1.98432	3.95677	0.000160042
ACX60_00955	ACX60_00955	-1.98411	3.95617	0.000384382
ACX60_09660	mtlD	-1.98208	3.95063	0.000177831
ACX60_04455	ACX60_04455	-1.97761	3.9384	0.0186112
ACX60_06385	bioA2	-1.97052	3.9191	0.00562488
ACX60_00865	ACX60_00865	-1.96059	3.89221	0.000625586
ACX60_09870	ACX60_09870	-1.9569	3.88226	0.011045
ACX60_00525	ACX60_00525	-1.95664	3.88157	0.000296696
ACX60_00285	ACX60_00285	-1.95546	3.87839	0.00277493
ACX60_13585	cjaB	-1.94371	3.84694	0.000881612
ACX60_05315	ACX60_05315	-1.94021	3.83761	0.00618797
ACX60_10685	gltI	-1.9371	3.82934	0.000296733
ACX60_06175	pepD	-1.93606	3.82659	0.00164141
ACX60_04265	ACX60_04265	-1.93081	3.8127	0.00702262
ACX60_08055	ACX60_08055	-1.92316	3.79253	7.80521e-05
ACX60_17545	paaF	-1.91996	3.78411	0.000246767
ACX60_00725	ACX60_00725	-1.91731	3.77717	3.40731e-05
ACX60_09250	atoB	-1.91447	3.76976	0.0014704
ACX60_13555	mro	-1.91032	3.75892	0.00186787
ACX60_13345	aceA	-1.90031	3.73292	0.000969502
ACX60_04185	ACX60_04185	-1.88311	3.6887	0.00286373
ACX60_00935	ACX60_00935	-1.87357	3.66439	0.000645282
ACX60_13835	ggt	-1.8659	3.64494	0.000940351
ACX60_11295	mccA	-1.86476	3.64208	0.0180629
ACX60_05070	ACX60_05070	-1.84983	3.60457	0.00140951
ACX60_04055	ACX60_04055	-1.84759	3.59898	0.00138229
ACX60_08285	clpA	-1.8433	3.58829	0.000108701
ACX60_12285	cinA	-1.84203	3.58515	0.00180549
ACX60_00050	adeT	-1.84195	3.58494	0.0154548
ACX60_17285	ACX60_17285	-1.84032	3.5809	0.00156959
ACX60_17540	echA9	-1.83809	3.57535	0.0186054
ACX60_12325	ACX60_12325	-1.81637	3.52193	0.00275447
ACX60_11850	ACX60_11850	-1.78988	3.45786	0.000450415
ACX60_07780	ACX60_07780	-1.78776	3.45279	0.00890065
ACX60_07115	ACX60_07115	-1.7834	3.44236	0.00198165
ACX60_07220	ACX60_07220	-1.7829	3.44116	0.00186176
ACX60_08355	ycaP	-1.77397	3.41993	0.0184606
ACX60_06820	ACX60_06820	-1.77112	3.41319	0.0392434
ACX60_02980	glnE	-1.7633	3.39474	0.000148413
ACX60_05295	ACX60_05295	-1.76132	3.39007	0.0490358
ACX60_10495	yceI	-1.74837	3.35978	0.000478107
ACX60_04545	ACX60_04545	-1.74697	3.35653	0.00101672
ACX60_13940	olsB	-1.74245	3.34604	0.0128931
ACX60_01800	ACX60_01800	-1.7411	3.3429	0.000162903
ACX60_10645	ACX60_10645	-1.72933	3.31574	0.00256796
ACX60_05725	xdhB	-1.72879	3.31449	0.0393199
ACX60_04390	cycA	-1.71819	3.29024	3.9438e-05
ACX60_07065	ACX60_07065	-1.70396	3.25794	0.000603395
ACX60_14385	ACX60_14385	-1.70393	3.25786	0.0186054
ACX60_16310	ACX60_16310	-1.70063	3.25043	0.045592
ACX60_13450	ybbA	-1.69996	3.24891	0.00889608
ACX60_03180	ACX60_03180	-1.69776	3.24397	0.0215495
ACX60_14730	ACX60_14730	-1.69683	3.24187	0.00027608
ACX60_14905	nudL	-1.69564	3.23921	0.000121343
ACX60_08645	cpo	-1.69381	3.2351	0.00132428
ACX60_06580	sndH	-1.69108	3.22898	0.00027608
ACX60_06995	miaA	-1.68678	3.21937	0.0106454
ACX60_16335	pap	-1.68539	3.21627	3.13453e-05
ACX60_05330	aroP	-1.68186	3.20842	0.0330168
ACX60_02260	ACX60_02260	-1.67903	3.20213	0.000645282
ACX60_03680	ACX60_03680	-1.67633	3.19615	0.0220716
ACX60_02500	atuF	-1.67299	3.18874	0.0490905
ACX60_01925	pspC	-1.67277	3.18826	0.000806459
ACX60_11935	uspA	-1.66366	3.16818	0.000330119
ACX60_14270	ygaU	-1.6633	3.16739	0.00588171
ACX60_14935	ACX60_14935	-1.65694	3.15347	0.0349106
ACX60_08265	ACX60_08265	-1.65279	3.14442	0.00032985
ACX60_08545	ACX60_08545	-1.65156	3.14173	0.00901123
ACX60_01590	ACX60_01590	-1.65076	3.13998	0.00406875
ACX60_04415	xerC	-1.64245	3.12196	0.00348775
ACX60_07810	ACX60_07810	-1.64084	3.11847	0.0199621
ACX60_00110	metP	-1.63533	3.10659	0.00736125
ACX60_11275	ACX60_11275	-1.63408	3.10389	0.0174075
ACX60_14435	ACX60_14435	-1.63281	3.10117	7.70277e-05
ACX60_14030	ACX60_14030	-1.63235	3.10018	0.0285414
ACX60_05055	blc	-1.63095	3.09717	0.00392451
ACX60_14790	gcdR	-1.62889	3.09275	0.0156556
ACX60_01850	ACX60_01850	-1.62698	3.08866	0.00209196
ACX60_10885	nfdA	-1.62308	3.08033	0.0018712
ACX60_16785	algR	-1.61653	3.06637	0.000250671
ACX60_05360	ACX60_05360	-1.59942	3.03021	0.00137363
ACX60_03235	fadB	-1.59925	3.02985	0.0038171
ACX60_07060	ACX60_07060	-1.59767	3.02654	0.00162517
ACX60_11300	yngG	-1.59145	3.01353	0.0114418
ACX60_05770	dtpT	-1.58868	3.00774	0.000140586
ACX60_17710	csiR_1	-1.58787	3.00606	0.0131655
ACX60_06960	ACX60_06960	-1.58697	3.00419	0.0188816
ACX60_14940	ACX60_14940	-1.56956	2.96813	0.00269186
ACX60_07800	moaC	-1.56615	2.96113	0.00438279
ACX60_15695	pta	-1.56012	2.94878	0.00253459
ACX60_00950	actP	-1.5582	2.94485	0.0220409
ACX60_08470	ACX60_08470	-1.55598	2.94033	0.00140951
ACX60_09385	bdhA	-1.55581	2.93999	0.001069
ACX60_05045	ycdB	-1.54834	2.9248	0.000348592
ACX60_10670	gltL	-1.5479	2.92391	0.0318034
ACX60_01780	parA	-1.53535	2.89859	0.00197199
ACX60_11470	paaC	-1.53465	2.89717	0.0489683
ACX60_17995	ACX60_17995	-1.52609	2.88004	0.00203648
ACX60_09850	yraR	-1.52344	2.87475	0.0253486
ACX60_17880	desA3	-1.52324	2.87435	0.0184606
ACX60_16905	uvrY	-1.50991	2.84792	0.0178904
ACX60_03690	hchA	-1.50982	2.84775	0.0185726
ACX60_11270	acsf	-1.50948	2.84708	0.0409956
ACX60_08855	ACX60_08855	1.50198	2.83232	0.00255069
ACX60_01005	ACX60_01005	1.50613	2.84047	0.0179965
ACX60_17850	murJ	1.50954	2.8472	0.00705158
ACX60_18965	ACX60_18965	1.50955	2.84721	0.00219132
ACX60_02145	rplN	1.51855	2.86503	0.012286
ACX60_17305	atpC	1.52076	2.86942	0.0259327
ACX60_03545	yaaJ	1.52383	2.87554	0.00462903
ACX60_08970	ACX60_08970	1.53017	2.8882	0.00755148
ACX60_14230	ctc	1.53021	2.88828	0.00716278
ACX60_02155	rplE	1.53035	2.88856	0.0204284
ACX60_04475	serC	1.53757	2.90305	0.0142539
ACX60_02905	yajC	1.54033	2.90862	0.00471929
ACX60_01710	ACX60_01710	1.54158	2.91114	0.0013811
ACX60_12670	cybB	1.54331	2.91463	0.00460031
ACX60_04880	cbl	1.54356	2.91512	0.00247845
ACX60_15140	rplT	1.54774	2.92359	0.0473646
ACX60_03975	sdhA	1.55023	2.92864	0.00197199
ACX60_00070	tyrS	1.55455	2.93742	0.00200105
ACX60_16630	yuiF	1.55499	2.93832	0.041951
ACX60_10375	fba	1.56158	2.95176	0.0189937
ACX60_16000	infA	1.56232	2.95329	0.011045
ACX60_00380	hutU	1.58135	2.99249	0.000806459
ACX60_03265	cysI	1.58475	2.99956	0.000632159
ACX60_03315	rsmC	1.58564	3.00141	0.028675
ACX60_09495	ybaB	1.58825	3.00684	0.000450415
ACX60_18265	ACX60_18265	1.59048	3.01149	0.0146785
ACX60_12260	pyrC	1.5977	3.0266	0.00885497
ACX60_12650	lysC	1.59927	3.02991	0.00569174
ACX60_04195	groS	1.60054	3.03257	0.026148
ACX60_04510	htrB	1.60334	3.03845	0.00228133
ACX60_05465	efp	1.60425	3.04037	0.0114351
ACX60_13255	rnfB	1.61149	3.05568	0.00928271
ACX60_18270	ACX60_18270	1.61305	3.05898	0.0130897
ACX60_16690	secE	1.62489	3.08419	0.0013811
ACX60_03905	yeeF	1.63727	3.11077	0.00139249
ACX60_03325	typA	1.64893	3.13601	0.0088922
ACX60_00845	guaB	1.65092	3.14034	0.00460031
ACX60_02150	rplX	1.65204	3.14277	0.0119573
ACX60_10555	queG	1.65926	3.15854	0.0142539
ACX60_01410	czcB	1.66353	3.1679	0.0476746
ACX60_17250	def	1.66426	3.1695	0.000700118
ACX60_07915	pyrH	1.67177	3.18606	0.0103079
ACX60_17625	rluA	1.67726	3.1982	0.042081
ACX60_14040	tuf	1.67849	3.20094	0.0186054
ACX60_18960	ACX60_18960	1.68315	3.21129	0.0007093
ACX60_02005	corA	1.68554	3.21662	0.0490402
ACX60_16685	nusG	1.69019	3.22699	0.0237649
ACX60_02165	rpsH	1.69279	3.23282	0.0459366
ACX60_07920	frr	1.69555	3.239	0.0265168
ACX60_16615	htpG	1.70326	3.25636	0.0116752
ACX60_05405	ACX60_05405	1.70511	3.26054	0.0339064
ACX60_17860	nadC	1.70935	3.27014	0.0277919
ACX60_16550	ACX60_16550	1.70995	3.27149	0.0337983
ACX60_14225	prs	1.71246	3.2772	0.0219554
ACX60_05035	ACX60_05035	1.71449	3.28181	0.0189164
ACX60_10750	ACX60_10750	1.71961	3.29348	0.00337671
ACX60_02895	secF	1.72553	3.307	0.0377133
ACX60_02740	ACX60_02740	1.74541	3.35291	0.0289925
ACX60_05620	fatB	1.7492	3.36173	0.0211541
ACX60_15800	lgt	1.74968	3.36285	0.0313576
ACX60_02240	sdhE	1.7558	3.37714	0.0114791
ACX60_16555	lpxO	1.75857	3.38363	0.0030256
ACX60_17795	ACX60_17795	1.76771	3.40514	0.00213383
ACX60_05410	surE	1.77881	3.43144	0.00311339
ACX60_10930	tauA	1.78986	3.45782	0.000676995
ACX60_18325	ACX60_18325	1.79159	3.46195	0.000102714
ACX60_10730	ychF	1.80378	3.49133	0.0183547
ACX60_06700	rplI	1.80716	3.49952	0.0343047
ACX60_17310	atpD	1.82076	3.53267	0.00189032
ACX60_03025	ACX60_03025	1.82575	3.54492	0.000517248
ACX60_15195	panC	1.8311	3.55807	0.00471929
ACX60_00365	ACX60_00365	1.83358	3.56419	0.000461609
ACX60_04100	yhbY	1.83935	3.57848	0.00618797
ACX60_17325	atpH	1.84072	3.58189	0.000453307
ACX60_07335	ptpA	1.84206	3.58522	0.00619233
ACX60_17425	guaA	1.84256	3.58645	0.000250671
ACX60_12945	aroP	1.84348	3.58875	0.00164141
ACX60_03730	rssA	1.85709	3.62276	0.00123885
ACX60_04395	ACX60_04395	1.86958	3.65425	0.0255476
ACX60_05735	yfcN	1.87379	3.66495	0.0018712
ACX60_16470	ACX60_16470	1.87418	3.66592	0.010934
ACX60_17740	manB	1.87619	3.67104	0.000456786
ACX60_09265	ACX60_09265	1.87905	3.67832	0.0135759
ACX60_14050	rpsG	1.88342	3.68949	0.00879479
ACX60_05855	metF	1.88404	3.69107	0.000841085
ACX60_04955	lepB	1.89122	3.7095	0.00109985
ACX60_08435	ACX60_08435	1.89606	3.72196	0.0135759
ACX60_18870	ACX60_18870	1.90392	3.7423	0.0014158
ACX60_10815	ansB	1.90718	3.75076	0.000162903
ACX60_03125	btuB	1.91275	3.76527	0.000983477
ACX60_10410	bigR	1.93029	3.81131	0.0179492
ACX60_06490	csuB	1.93091	3.81294	0.00133482
ACX60_01675	rpsP	1.93254	3.81726	0.00298236
ACX60_07245	mgtC	1.93627	3.82715	0.00548932
ACX60_17340	atpB	1.94182	3.84191	0.0018712
ACX60_02925	queA	1.94489	3.85009	0.000244077
ACX60_16850	gluQ	1.94724	3.85636	0.00253459
ACX60_17315	atpG	1.94745	3.85693	0.00188616
ACX60_00245	mutY	1.94858	3.85995	0.0039753
ACX60_17115	yicG	1.96113	3.89367	0.00177067
ACX60_01255	hisF	1.9696	3.91659	0.000337533
ACX60_18115	ybjG	1.9726	3.92476	0.00616847
ACX60_10590	ACX60_10590	1.98224	3.95107	0.000356589
ACX60_13700	yaeQ	1.9946	3.98506	0.0156556
ACX60_13050	argG	1.99563	3.9879	0.00115159
ACX60_18100	ACX60_18100	2.00477	4.01324	0.00127251
ACX60_05225	ACX60_05225	2.02215	4.0619	0.00189473
ACX60_08210	ACX60_08210	2.03148	4.08825	0.0260838
ACX60_05100	dusB	2.03299	4.09252	0.0125355
ACX60_14505	acdS	2.03307	4.09276	0.042081
ACX60_04570	trmH	2.04427	4.12463	0.00454397
ACX60_00030	dedA	2.0502	4.14164	0.0107094
ACX60_18125	ACX60_18125	2.05215	4.14725	0.0253214
ACX60_06005	glyA	2.05221	4.14739	0.000625593
ACX60_12265	ACX60_17860	2.05363	4.15148	0.00101672
ACX60_14055	ACX60_14055	2.05422	4.1532	0.0107891
ACX60_02160	rpsN	2.08326	4.23764	0.0163672
ACX60_10655	yebC	2.08589	4.24538	0.00182051
ACX60_02205	rpsM	2.09143	4.26171	0.000162903
ACX60_02170	rplF	2.09288	4.266	0.0123309
ACX60_18430	ACX60_18430	2.1027	4.29513	0.0038171
ACX60_18495	ACX60_18495	2.10321	4.29664	0.0211541
ACX60_07860	ACX60_07860	2.10929	4.31478	0.00027608
ACX60_03950	yceA	2.11123	4.32059	0.000429918
ACX60_02190	rplO	2.13002	4.37723	0.00393114
ACX60_18445	ACX60_18445	2.13859	4.40333	0.00162633
ACX60_18215	ACX60_18215	2.13937	4.4057	0.000236931
ACX60_16665	rplL	2.14069	4.40973	0.00325626
ACX60_13930	ACX60_13930	2.14171	4.41283	0.00221796
ACX60_02350	xpt	2.14776	4.43139	0.00347704
ACX60_11930	mdmC	2.1486	4.43398	0.00312566
ACX60_01505	mraY	2.15198	4.44438	0.0396607
ACX60_02195	secY	2.1577	4.46203	0.00140951
ACX60_17330	atpF	2.15909	4.46634	0.000326764
ACX60_04150	folD	2.16886	4.49667	0.002399
ACX60_06330	rpsU	2.17234	4.50754	0.00171825
ACX60_02130	rplP	2.17557	4.51763	0.000219417
ACX60_18990	ACX60_18990	2.17618	4.51954	0.00032985
ACX60_07730	accB	2.17773	4.52441	0.0327338
ACX60_04530	purM	2.17789	4.52492	0.000940351
ACX60_18255	ACX60_18255	2.17792	4.525	0.000117989
ACX60_02870	ispZ	2.19246	4.57086	0.00164141
ACX60_18095	purE	2.19621	4.58273	0.000349248
ACX60_01450	mmuP	2.19915	4.59207	7.34682e-05
ACX60_02090	rpsJ	2.20579	4.61328	0.000536355
ACX60_16670	rplJ	2.21022	4.62746	0.00104352
ACX60_15105	ACX60_15105	2.21446	4.64108	0.0173649
ACX60_06915	ACX60_06915	2.22101	4.6622	0.00736125
ACX60_04525	purN	2.22382	4.6713	0.0223047
ACX60_13155	lysE	2.22809	4.68513	0.00143057
ACX60_17320	atpA	2.23468	4.7066	0.000186735
ACX60_14710	ACX60_14710	2.24066	4.72614	0.000326021
ACX60_18205	ACX60_18205	2.24115	4.72774	2.61444e-05
ACX60_17335	atpE	2.2425	4.73218	0.00393114
ACX60_10420	ACX60_10420	2.24816	4.75076	0.00283357
ACX60_06505	csuE	2.27161	4.8286	0.00696464
ACX60_05860	ahcY	2.27473	4.83908	0.00113131
ACX60_14025	rimI	2.2833	4.86791	0.00163605
ACX60_10385	pgk	2.28456	4.87215	0.000356589
ACX60_17300	ACX60_17300	2.28469	4.87259	0.000125959
ACX60_03540	ACX60_03540	2.30573	4.94418	0.000638653
ACX60_01730	serA	2.32089	4.99642	0.0007204
ACX60_12665	ACX60_12665	2.32677	5.01681	0.0018712
ACX60_02175	rplR	2.33409	5.04233	0.0130897
ACX60_18520	ACX60_18520	2.34782	5.09055	1.94431e-05
ACX60_18915	ACX60_18915	2.34972	5.09726	0.000189804
ACX60_16675	rplA	2.35639	5.12087	0.00258414
ACX60_01475	sbp	2.35745	5.12463	0.0143251
ACX60_03935	ACX60_03935	2.35924	5.131	0.00197199
ACX60_09380	yneE	2.36925	5.16671	0.0172145
ACX60_05445	rpmE	2.37277	5.17933	0.0139984
ACX60_08795	ACX60_08795	2.37568	5.18979	0.0312045
ACX60_02220	rpoA	2.37614	5.19146	0.000162903
ACX60_02180	rpsE	2.38462	5.22206	0.0109129
ACX60_14415	dusC	2.38574	5.22613	0.0196632
ACX60_08225	ACX60_08225	2.38675	5.2298	3.59388e-05
ACX60_16680	rplK	2.39005	5.24177	0.00292754
ACX60_06480	csuA/B	2.39463	5.25842	0.000239253
ACX60_10650	plsC2	2.43397	5.40379	0.00982203
ACX60_05915	rpsB	2.43622	5.41222	0.000642084
ACX60_01815	gdhA	2.43907	5.42293	0.000114334
ACX60_15865	rpmB	2.43972	5.42536	1.86549e-05
ACX60_15145	rpmI	2.44569	5.44787	0.00789193
ACX60_14485	ACX60_14485	2.44794	5.45635	0.032816
ACX60_03860	rplU	2.44803	5.45672	0.000273742
ACX60_06500	csuD	2.45138	5.46938	0.000480678
ACX60_02125	rpsC	2.45263	5.47413	0.000293056
ACX60_05920	tsf	2.46335	5.51494	0.00269186
ACX60_18210	ACX60_18210	2.49462	5.63578	0.00867694
ACX60_00390	proY	2.49538	5.63878	0.000136836
ACX60_02120	rplV	2.51968	5.73455	0.00200418
ACX60_03305	rtcB	2.52283	5.74709	4.12834e-05
ACX60_01690	rplS	2.5441	5.83245	0.00164141
ACX60_09130	acrF	2.5474	5.84581	0.000476577
ACX60_09325	yidP	2.553	5.86853	0.037791
ACX60_18350	ftsA	2.5687	5.93274	0.000117989
ACX60_02215	rpsD	2.56891	5.93361	0.000843935
ACX60_10415	sstT	2.57593	5.96255	2.93857e-05
ACX60_02210	rpsK	2.57844	5.97292	0.00156248
ACX60_00385	hutH	2.58069	5.98225	6.29419e-06
ACX60_03320	xanP	2.58557	6.00253	0.000625586
ACX60_02135	rpmC	2.59276	6.03253	0.0197469
ACX60_17085	ppa	2.59486	6.04132	0.00179808
ACX60_02225	rplQ	2.60226	6.07238	0.000336364
ACX60_06975	ACX60_06975	2.6023	6.07256	0.00393235
ACX60_02140	rpsQ	2.61259	6.11601	0.00395837
ACX60_07250	ydcO	2.64013	6.23389	0.000572066
ACX60_09620	ACX60_09620	2.64601	6.25934	0.000326764
ACX60_18195	rpmH	2.64898	6.27226	0.0192405
ACX60_14240	panD	2.65069	6.27966	0.00103473
ACX60_16700	tuf	2.65205	6.28559	0.000456598
ACX60_12015	ACX60_12015	2.66012	6.32087	0.000329431
ACX60_18340	ACX60_18340	2.66427	6.33907	8.9688e-05
ACX60_00965	ACX60_00965	2.67244	6.37506	0.000292108
ACX60_02095	rplC	2.68629	6.43655	0.00789193
ACX60_03510	sanA	2.68725	6.44086	0.000140586
ACX60_06495	csuC	2.6916	6.46027	0.000121799
ACX60_08110	brnQ	2.69594	6.47977	0.00499972
ACX60_18355	ACX60_18355	2.72697	6.62066	0.000580057
ACX60_10585	mrkC	2.73634	6.6638	0.00162517
ACX60_14200	ispE	2.73889	6.67557	4.97373e-05
ACX60_04895	cysT	2.74268	6.69312	0.00461785
ACX60_18460	ftsK	2.75039	6.729	6.76202e-05
ACX60_06710	rpsF	2.77248	6.83284	3.13453e-05
ACX60_02115	rpsS	2.78479	6.89136	0.00232533
ACX60_18985	ACX60_18985	2.79356	6.9334	4.97373e-05
ACX60_14045	fusA	2.80924	7.00917	0.00164141
ACX60_15960	gltT	2.81859	7.05473	7.27391e-07
ACX60_15780	tatC	2.8188	7.05575	0.0156556
ACX60_06485	csuA	2.8356	7.1384	0.000162886
ACX60_06475	ACX60_06475	2.87406	7.33127	0.0012764
ACX60_18345	ACX60_18345	2.89939	7.46111	0.000190119
ACX60_18330	ACX60_18330	2.91274	7.53045	1.19198e-06
ACX60_18440	ACX60_18440	2.9242	7.59052	0.015642
ACX60_02110	rplB	2.92527	7.59615	0.000724643
ACX60_00395	hutI	2.93755	7.66108	5.33665e-05
ACX60_18545	ACX60_18545	2.93886	7.66806	5.26201e-06
ACX60_18410	ACX60_18410	2.95274	7.7422	6.47266e-06
ACX60_00265	ACX60_00265	2.98039	7.89197	0.00734354
ACX60_02105	rplW	3.01553	8.0866	0.000488038
ACX60_02885	radC	3.01879	8.10486	0.0289925
ACX60_11245	ACX60_11245	3.04691	8.26441	0.00148417
ACX60_02185	rpmD	3.08396	8.47939	0.0169066
ACX60_02200	rpmJ	3.12634	8.73216	0.0135759
ACX60_02100	rplD	3.15916	8.93308	0.00131311
ACX60_12010	ACX60_12010	3.17228	9.01469	0.00951643
ACX60_11145	papP	3.27573	9.68482	0.0490402
ACX60_00400	hutG	3.28835	9.76994	9.38283e-05
ACX60_18075	ACX60_18075	3.34721	10.1768	0.00027608
ACX60_10580	yehC	3.35515	10.233	0.00774288
ACX60_18425	ACX60_18425	3.40283	10.5768	7.80521e-05
ACX60_09520	ACX60_09520	3.43234	10.7954	0.0243847
ACX60_18450	ACX60_18450	3.4395	10.849	1.19198e-06
ACX60_04120	ACX60_04120	3.46598	11.0501	0.0135759
ACX60_18360	ACX60_18360	3.47035	11.0836	1.09246e-05
ACX60_18335	ACX60_18335	3.47389	11.1108	2.51464e-05
ACX60_18885	ACX60_18885	3.49906	11.3064	0.00406436
ACX60_09125	acrE	3.51719	11.4493	0.00736125
ACX60_17935	ssuA	3.53194	11.567	0.000299474
ACX60_03300	ACX60_03300	3.54102	11.64	0.0186282
ACX60_18455	ACX60_18455	3.58309	11.9845	0.000122634
ACX60_00670	ACX60_00670	3.64438	12.5045	1.06859e-05
ACX60_18420	icmE	3.74843	13.4397	4.93885e-06
ACX60_18540	ACX60_18540	3.80277	13.9556	6.47266e-06
ACX60_14460	mtnN	3.81886	14.1121	1.82047e-05
ACX60_18415	ACX60_18415	3.85598	14.4799	1.77922e-05
ACX60_04905	cysP	3.936	15.3057	2.20788e-05
ACX60_01085	ACX60_01085	3.95669	15.5268	2.18073e-05
ACX60_18530	ACX60_18530	4.30788	19.8062	0.0313489
ACX60_18370	ACX60_18370	4.34053	20.2596	1.85677e-05
ACX60_18365	dotC	4.51454	22.8567	5.90444e-06
ACX60_10575	ACX60_10575	4.77322	27.3454	4.37496e-06
ACX60_07240	mgtA	4.83316	28.5053	1.86549e-05
ACX60_18405	ACX60_18405	4.91354	30.1386	0.000360039
ACX60_04890	cysW	4.99185	31.8198	0.0209348
ACX60_01875	ydfC	5.41208	42.5793	4.16826e-06
ACX60_04900	ACX60_04900	5.41624	42.7021	0.000478107
